# Community-based Reconstruction and Simulation of a Full-scale Model of Region CA1 of Rat Hippocampus

Armando Romani<sup>1,+</sup>, Alberto Antonietti<sup>1</sup>, Davide Bella<sup>1</sup>, Julian Budd<sup>1,3</sup>, Elisabetta Giacalone<sup>2</sup>, Kerem Kurban<sup>1</sup>, Sára Sáray<sup>3,4</sup>, Marwan Abdellah<sup>1</sup>, Alexis Arnaudon<sup>1</sup>, Elvis Boci<sup>1</sup>, Cristina Colangelo<sup>1</sup>, Jean-Denis Courcol<sup>1</sup>, Thomas Delemontex<sup>1</sup>, András Ecker<sup>1</sup>, Joanne Falck<sup>5</sup>, Cyrille Favreau<sup>1</sup>, Michael Gevaert<sup>1</sup>, Juan B. Hernando<sup>1</sup>, Joni Herttuainen<sup>1</sup>, Genrich Ivaska<sup>1</sup>, Lida Kanari<sup>1</sup>, Anna-Kristin Kaufmann<sup>1</sup>, James Gonzalo King<sup>1</sup>, Pramod Kumbhar<sup>1</sup>, Sigrun Lange<sup>5,6</sup>, Huanxiang Lu<sup>1</sup>, Carmen Alina Lupascu<sup>2</sup>, Rosanna Migliore<sup>2</sup>, Fabien Petitjean<sup>1</sup>, Judit Planas<sup>1</sup>, Pranav Rai<sup>1</sup>, Srikanth Ramaswamy<sup>1</sup>, Michael W. Reimann<sup>1</sup>, Juan Luis Riquelme<sup>1</sup>, Nadir Román Guerrero<sup>1</sup>, Ying Shi<sup>1</sup>, Vishal Sood<sup>1</sup>, Mohameth François Sy<sup>1</sup>, Werner Van Geit<sup>1</sup>, Liesbeth Vanherpe<sup>1</sup>, Tamás F. Freund<sup>3,4,\*</sup>, Audrey Mercer<sup>5,\*</sup>, Eilif Müller<sup>1,\*</sup>, Felix Schürmann<sup>1,\*</sup>, Alex M. Thomson<sup>5,\*</sup>, Michele Migliore<sup>2,\*,+</sup>, Szabolcs Káli<sup>3,4,\*,+</sup>, and Henry Markram<sup>1,\*,+</sup>

<sup>1</sup>Blue Brain Project, École polytechnique fédérale de Lausanne (EPFL), Campus Biotech, Geneva, Switzerland

<sup>2</sup>Institute of Biophysics, National Research Council (CNR), Palermo, Italy

<sup>3</sup>Institute of Experimental Medicine (KOKI), Eötvös Loránd Research Network, Budapest, Hungary

<sup>4</sup>Faculty of Information Technology and Bionics, Pázmány Péter Catholic University, Budapest, Hungary

<sup>5</sup>UCL School of Pharmacy, University College London (UCL), London, UK

<sup>6</sup>School of Life Sciences, University of Westminster, London, UK

\*Co-senior authors

+Corresponding authors

May 17, 2023

## 21 **Abstract**

22 The CA1 region of the hippocampus is one of the most studied regions of the rodent brain, thought  
23 to play an important role in cognitive functions such as memory and spatial navigation. Despite a  
24 wealth of experimental data on its structure and function, it can be challenging to reconcile information  
25 obtained from diverse experimental approaches. To address this challenge, we present a community-  
26 driven, full-scale *in silico* model of the rat CA1 that integrates a broad range of experimental data, from  
27 synapse to network, including the reconstruction of its principal afferents, the Schaffer collaterals, and  
28 a model of the effects that acetylcholine has on the system. We have tested and validated each model  
29 component and the final network model, and made input data, assumptions, and strategies explicit and  
30 transparent. The flexibility of the model allows scientists to address a range of scientific questions. In  
31 this article, we describe the methods used to set up simulations that reproduce and extend *in vitro* and  
32 *in vivo* experiments. Among several applications in the article, we focus on theta rhythm, a prominent  
33 hippocampal oscillation associated with various behavioral correlates and use our computer model to  
34 reproduce and reconcile experimental findings. Finally, we make data, code and model available through  
35 the hippocampushub.eu portal, which also provides an extensive set of analyses of the model and a user-  
36 friendly interface to facilitate adoption and usage. This neuroscience community-driven model represents  
37 a valuable tool for integrating diverse experimental data and provides a foundation for further research  
38 into the complex workings of the hippocampal CA1 region.

## 39 **Keywords**

40 hippocampus, CA1, neuroscience community, large-scale compartmental modeling, data-driven.

## 41 **1 Introduction**

42 The hippocampus is thought to play a fundamental role in cognitive functions such as learning, memory,  
43 and spatial navigation (Morris et al., 1982; O'Keefe & Dostrovsky, 1971). It consists of three subfields  
44 of *cornu ammonis* (CA), CA1, CA2, and CA3 (see Amaral and Witter, 1989). CA1, for instance, one  
45 of the most studied, provides the major hippocampal output to the neocortex and many other brain  
46 regions (e.g. Soltesz and Losonczy, 2018). Therefore, understanding the function of CA1 represents a  
47 significant step towards explaining the role of hippocampus in cognition.

48 Each year the large neuroscientific community studying hippocampus contributes thousands of papers  
49 to an existing mass of empirical data collected over many decades of research (see Figure S1). Recent  
50 reviews have, however, highlighted gaps and inconsistencies in the existing literature (Bezaire & Soltesz,  
51 2013; Pelkey et al., 2017; Sanchez-Aguilera et al., 2021; Wheeler et al., 2015). Currently, the community  
52 lacks a unifying, multiscale model of hippocampal structure and function with which to integrate new  
53 and existing data.

54 Computational models and simulations have emerged as crucial tools in neuroscience for consolidating  
55 diverse multiscale data into unified, consistent and quantitative frameworks that can be used to validate  
56 and predict dynamic behavior (Fan & Markram, 2019). However, constructing such models requires  
57 assigning values to model parameters, which often involves resolving conflicts in the data, identifying  
58 gaps in knowledge, and making explicit assumptions to compensate for any incomplete data. In order to  
59 validate the model, it must be tested under specific experimental conditions using independent sources  
60 of empirical evidence before the model can be used to generate experimentally testable predictions.  
61 Therefore, the curation of a vast range of experimental data is a fundamental step in constructing and  
62 parametrizing any data-driven model of hippocampus.

63 The challenge of incorporating these data into a comprehensive reference model of hippocampus, how-  
64 ever, is considerable and calls for a community effort. While community-wide projects are common in  
65 other disciplines (e.g. Human Genome Project in bioinformatics, CERN in particle physics, NASA's  
66 Great Observatories program in astronomy - Aad and Abbott, 2015; Hood and Rowen, 2013; Rock-  
67 ström et al., 2009), they are a relatively recent development in neuroscience. OpenWorm, for example,  
68 is a successful, decade-long community project to create and simulate a realistic, data-driven reference  
69 model of the roundworm *Caenorhabditis elegans* (*C. elegans*) including its neural circuitry of ~302  
70 neurons to study the behavior of this relatively simple organism *in silico* (Gerkin et al., 2018; Szigeti  
71 et al., 2014). By contrast, for the hippocampus, with a circuit many orders of magnitude larger than  
72 *C. elegans*, models have typically been constructed with a minimal circuit structure on a relatively small  
73 scale and often their model parameters have been tuned with the goal of reproducing a single empirical  
74 phenomenon (see Sutton and Ascoli, 2021). Comparing the results from a variety of circuit models  
75 is problematic because they vary in their degree of realism and frequently rely on one or a few single  
76 neuron models making generalization of their findings difficult (see Sutton and Ascoli, 2021). While  
77 these focused models have led to valuable insights (see M. E. Hasselmo et al., 2020), this piecemeal  
78 approach fails to demonstrate whether these separate phenomena can be reproduced in a full circuit  
79 model without the need to adjust parameters.

80 Large-scale circuit models of hippocampus using realistic multi-compartment spiking neuronal models  
81 pioneered by Traub and colleagues (Traub et al., 1988, 1992, 2000; Traub & Miles, 1991) have been  
82 used to explain key characteristics of oscillatory activity observed in hippocampal slices and to examine  
83 the origins of epilepsy in region CA3. More recently, with significant increases in high-performance  
84 computing resources, Cutsuridis et al. (2010) in a microcircuit model of CA1 and notably Bezaire et al.  
85 (2016) in a full-scale CA1 model, have examined the contribution of diverse types of interneurons to  
86 the generation of prominent theta (4-12 Hz) oscillations. While these large-scale circuit models provide  
87 a more holistic approach, they still need to incorporate other features to improve their realism. For  
88 instance, to better reflect the highly curved shape of the hippocampus, an atlas-based structure that  
89 more closely mimics anatomy is required. Additionally, models need to employ pathway-specific short-  
90 term synaptic plasticity known to regulate circuit dynamics and neural coding (Tsodyks & Markram,  
91 1997). While Yu et al. (2020) have constructed a down-scaled, atlas-based model of the rat dentate  
92 gyrus (DG) to CA3 pathway, there has to date been no atlas-based, full-scale model of rat CA1 (For a  
93 more detailed comparison of these models, see Table S2).

94 To initiate a community effort of this magnitude requires an approach that standardizes data curation  
95 and integration of diverse datasets from different labs and uses these curated data to construct and  
96 simulate a scalable and reproducible circuit automatically. A reconstruction and simulation methodology  
97 was introduced and applied at the microcircuit scale, for the neocortex (Markram et al., 2015) and the  
98 thalamus (Iavarone et al., 2023) and at full-scale for a whole neocortical area (Reimann et al., 2022).  
99 However, these models relied primarily on datasets collected specifically for the purpose rather than data  
100 sought from and curated with the help of the scientific community.

101 In this paper, we describe a community-driven reconstruction and simulation of a full-scale, atlas-based  
102 multiscale structural and functional model of the area CA1 of the hippocampus that extends and improves  
103 upon the approach described in Markram et al. (2015). To stimulate the model beyond its intrinsic  
104 circuitry, we have also modeled the synaptic input from the largest afferent pathway to CA1, the Schaffer  
105 collaterals (SC) axons from CA3, the input most commonly stimulated electrically in the experiments,  
106 and the neuromodulatory influence of cholinergic inputs, perhaps the most studied neuromodulator in the  
107 hippocampus (Teles-Grilo Ruivo & Mellor, 2013). We constrained all model parameters and data using  
108 available experimental data from different labs or explicit assumptions made when data were lacking. We  
109 extensively tested and validated each model component and the final network to assess its quality. To  
110 maximize realism of the simulations, we set up simulation experiments to represent as closely as possible  
111 the experimental conditions of each empirical validation. We demonstrated the broad applicability of  
112 the model by studying the generation of neuronal oscillations, with a specific focus on theta rhythm, in  
113 response to a variety of different stimulus conditions. Over time and with the help of the community,  
114 limitations of the model revealed by these processes can be addressed to improve upon it. To facilitate  
115 a widespread adoption by the community, we have developed a web-based resource to share the model  
116 and its components, open sourcing extensive analyses, validations, and predictions that can be accessed  
117 as a complement to direct interaction with the model ([hippocampuspushub.eu](https://hippocampuspushub.eu)). Finally, we have developed  
118 a massive online open course (MOOC) to introduce users to the building, analysis, and simulation of a  
119 rat CA1 microcircuit (<https://www.edx.org/course/simulating-a-hippocampus-microcircuit>) providing  
120 a smaller version of the full-scale model for education purposes.



## 121 **2 Results**

122 We divide the results section into model reconstruction, and model simulation and applications. These  
123 subsections represent two distinct processes: the reconstruction of the general model and its use to  
124 investigate specific scientific questions (see Table S1, for a list of abbreviations and acronyms used in  
125 the paper).

### 126 **2.1 Model reconstruction**

127 In this section, we describe how we reconstructed the main components of the model: the cornus  
128 ammonis 1 (CA1), its main afferents, the Schaffer collaterals (SC), and the effect of acetylcholine  
129 (ACh). We describe each model component as a compound model of several building blocks (Figure 1).  
130 For each building block, we show how we evolved from the sparse data available in the literature to the  
131 dense data necessary for the reconstruction process. We provide the source of the data, our assumptions  
132 and our rationale. Finally, we show validations of the building blocks to assess their robustness and  
133 validity. We describe the technical details briefly in Methods, and fully in Supplementary Methods.

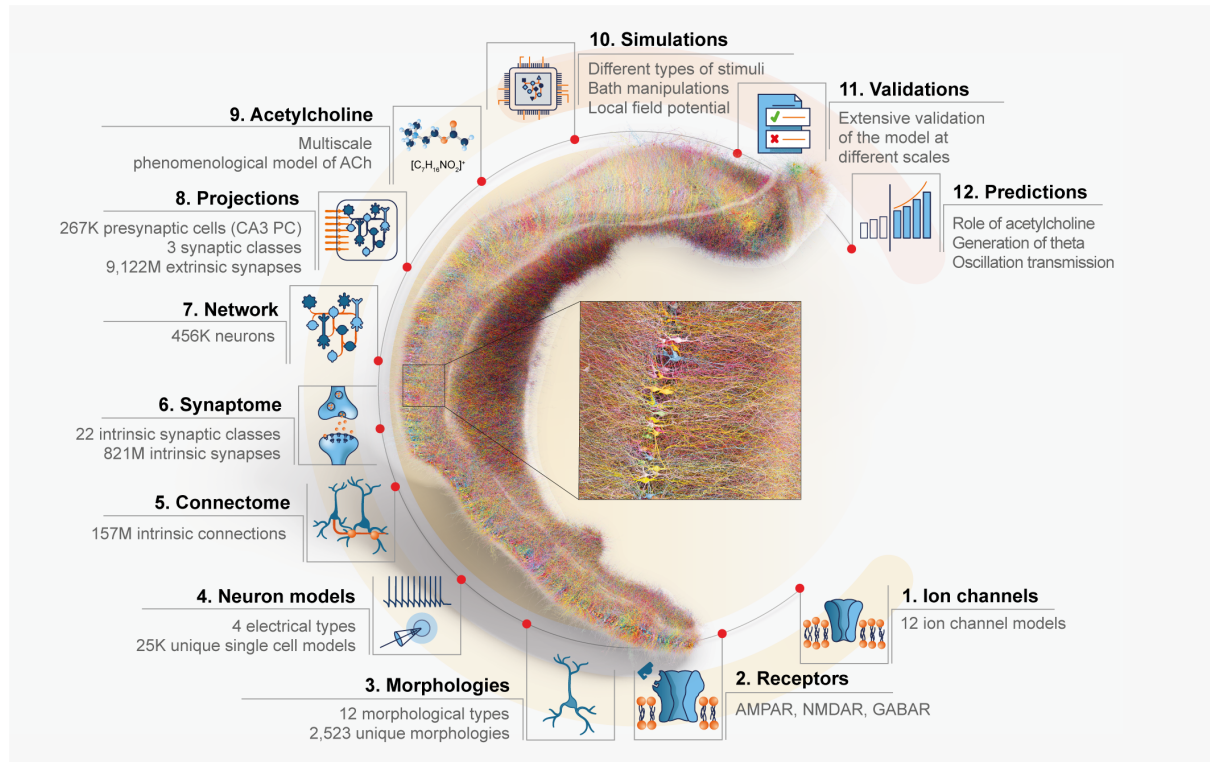

Figure 1: **Overview of the model and the reconstruction process.** A visualization of a full-scale, right-hemisphere reconstruction of rat CA1 region and its components. The number of cells is reduced to 1% for clarity, where neurons are randomly colored. The CA1 network model integrates entities of different spatial and temporal scales. The different scales also reflect our bottom-up approach to reconstruct the model. Ion channels (step 1) were inserted into the different morphological types (step 3) to reproduce electrophysiological characteristics and obtain neuron models (step 4). Neurons were then connected by synapses to generate an intrinsic CA1 connectome (step 5). For each intrinsic pathway, synaptic receptors (step 2) and transmission dynamics were assigned based on single neuron paired recording data (step 6) to create a functional intrinsic CA1 network model (step 7). The intrinsic CA1 circuit received synaptic input from CA3 via Schaffer collateral (SC) axons (step 8). The neuromodulatory influence of cholinergic release on the response of CA1 neurons and synapses was modeled phenomenologically (step 9). The dynamic response of the CA1 network was simulated with a variety of manipulations to model *in vitro* and *in vivo*, intrinsic and extrinsic stimulus protocols while recording intracellularly and extracellularly (step 10) to validate the circuit at different spatial scales against specific experimental studies (step 11) and to make experimentally testable predictions (step 12).

### 134 2.1.1 Cornu ammonis 1 (CA1)

135 We reconstructed a full-scale model of the CA1 field of the rat hippocampus (Figure 1) by follow-  
136 ing and adapting the method described in Markram et al. (2015). For the neuron models, we de-  
137 fined morphological type (m-type) and electrical properties type (e-type) of rat CA1 based on exper-  
138 imental datasets. For m-types, we used two datasets (from young adult Sprague Dawley and Wistar  
139 rats) which include 43 morphological reconstructions of neurons belonging to 12 m-types (Table S3,  
140 <https://www.hippocampushub.eu/model/experimental-data/neuronal-morphology/>). In particular, we  
141 considered one type of excitatory neuron, the pyramidal cell (PC), and 11 types of inhibitory neurons:

142 axo-axonic cell (AA), two types of bistratified cell (BS), back-projecting cell (BP), cholecystokinin (CCK)  
143 positive basket cell (CCKBC), ivy cell (Ivy), oriens lacunosum-moleculare cell (OLM), perforant pathway  
144 associated cell (PPA), parvalbumin positive basket cell (PVBC), Schaffer collateral associated cell (SCA),  
145 and trilaminar cell (Tri). We subsequently repaired, scaled and cloned the neurons to produce a morphol-  
146 ogy library of 2,592 cells (<https://www.hippocampusub.eu/model/digital-reconstructions/neurons/>).

147 To validate the resulting morphology library, we considered the distributions of 21 different morphological  
148 features and computed a similarity score between original and cloned morphologies. We report the  
149 average scores grouped per feature and per m-type in Figure S2 and show that the similarity scores of  
150 the clone morphologies are in agreement with the original samples (see supplementary methods). We  
151 also conducted correlation tests for different neurites between original and cloned morphologies (apical  
152 dendrites:  $R = 0.99$ ,  $p = 1.57 \times 10^{-42}$ , basal dendrites:  $R = 0.99$ ,  $p = 1.56 \times 10^{-27}$ , axons:  $R = 0.99$ ,  
153  $p = 1.03 \times 10^{-26}$ ). In addition, we compare the topological features of the original, repaired, and cloned  
154 morphologies using Topological Morphology Descriptor (TMD), as described in Kanari et al. (2018).  
155 In Figure S3, we present the persistence diagrams of the three stages, which indicate an increase in  
156 morphological diversity introduced by the cloning process. The details of the topological differences per  
157 m-type are presented in Figures S4 and S5.

158 For e-types, we used one dataset (from Sprague Dawley rats), which includes 1,456 experimentally  
159 obtained somatic voltage traces from 154 single cell recordings. We classified the recordings into  
160 four different e-types: classical accommodating for pyramidal cells and interneurons (cACpyr, cAC),  
161 bursting accommodating (bAC), and classical non-accommodating (cNAC), according to the well-  
162 established classification of Petilla Nomenclature (Petilla Interneuron Nomenclature Group et al., 2008)  
163 (<https://www.hippocampusub.eu/model/experimental-data/neuronal-electrophysiology/>). By analyz-  
164 ing our datasets, and where necessary, including data from the literature, each m-type can have one  
165 or multiple e-types with different probability. We used this information to derive the morpho-electrical  
166 type (me-type) composition (Table S4, [https://www.hippocampusub.eu/model/reconstruction-data/](https://www.hippocampusub.eu/model/reconstruction-data/cell-composition/)  
167 [cell-composition/](https://www.hippocampusub.eu/model/reconstruction-data/cell-composition/)).

168 We combined electrophysiological features (e-features) extracted from the single cell recordings with 34  
169 morphologies to produce 39 single cell models (or electrical models, e-models) (Ecker et al., 2020; R.  
170 Migliore et al., 2018) (<https://www.hippocampusub.eu/model/reconstruction-data/neuron-models/>).  
171 From this initial pool, we excluded three models because they did not correspond to any me-types  
172 described experimentally. We combined the remaining 36 e-models with 2,973 morphologies to obtain  
173 a library of 26,112 models that matched the initial set of e-features ([https://www.hippocampusub.](https://www.hippocampusub.eu/model/reconstruction-data/neuron-models/)  
174 [eu/model/reconstruction-data/neuron-models/](https://www.hippocampusub.eu/model/reconstruction-data/neuron-models/)). In the case of pyramidal cells, we further validated  
175 the e-models in terms of back-propagating action potential (BPAP) showing a close correlation to  
176 experimental findings (Golding et al., 2001) ( $R = 0.878$ ,  $p = 0.121$ ) and post-synaptic potential (PSP)  
177 attenuation (Magee & Cook, 2000) ( $R = 0.846$ ,  $p = 0.001$ ) (Figure S6).

178 To move from single cell to network level, we started to define the volume of the region (Figure  
179 S7). We took a publicly available atlas reconstruction of the hippocampus ([http://cng.gmu.edu/](http://cng.gmu.edu/hippocampus3d/)  
180 [hippocampus3d/](http://cng.gmu.edu/hippocampus3d/)) (Ropireddy et al., 2012) and considered only the CA1 region. Despite the fact  
181 that CA1 layers (stratum oriens (SO), stratum pyramidale (SP), SO. stratum radiatum (SR), and

182 stratum lacunosum moleculare (SLM)) were annotated in the original atlas, the presence of artifacts  
183 (see S1.13.1) made using the volume challenging with our existing algorithms. To alleviate the prob-  
184 lem, we followed additional curation steps. First, we algorithmically divided the volume into layers  
185 with a fixed ratio of their thicknesses (SO: 0.258 SP: 0.090 SR: 0.428 SLM: 0.224), according to  
186 the values extracted from the Sprague Dawley and Wistar dataset ([https://www.hippocampushub.  
187 eu/model/experimental-data/layer-anatomy/](https://www.hippocampushub.eu/model/experimental-data/layer-anatomy/)). Then we defined vector fields and a coordinate sys-  
188 tem that follow the three axes of the hippocampus (longitudinal, transverse, and radial) (Figure 2,  
189 <https://www.hippocampushub.eu/model/experimental-data/layer-anatomy/>). These extra features in-  
190 formed the subsequent processes of cell placement and circuit analysis.

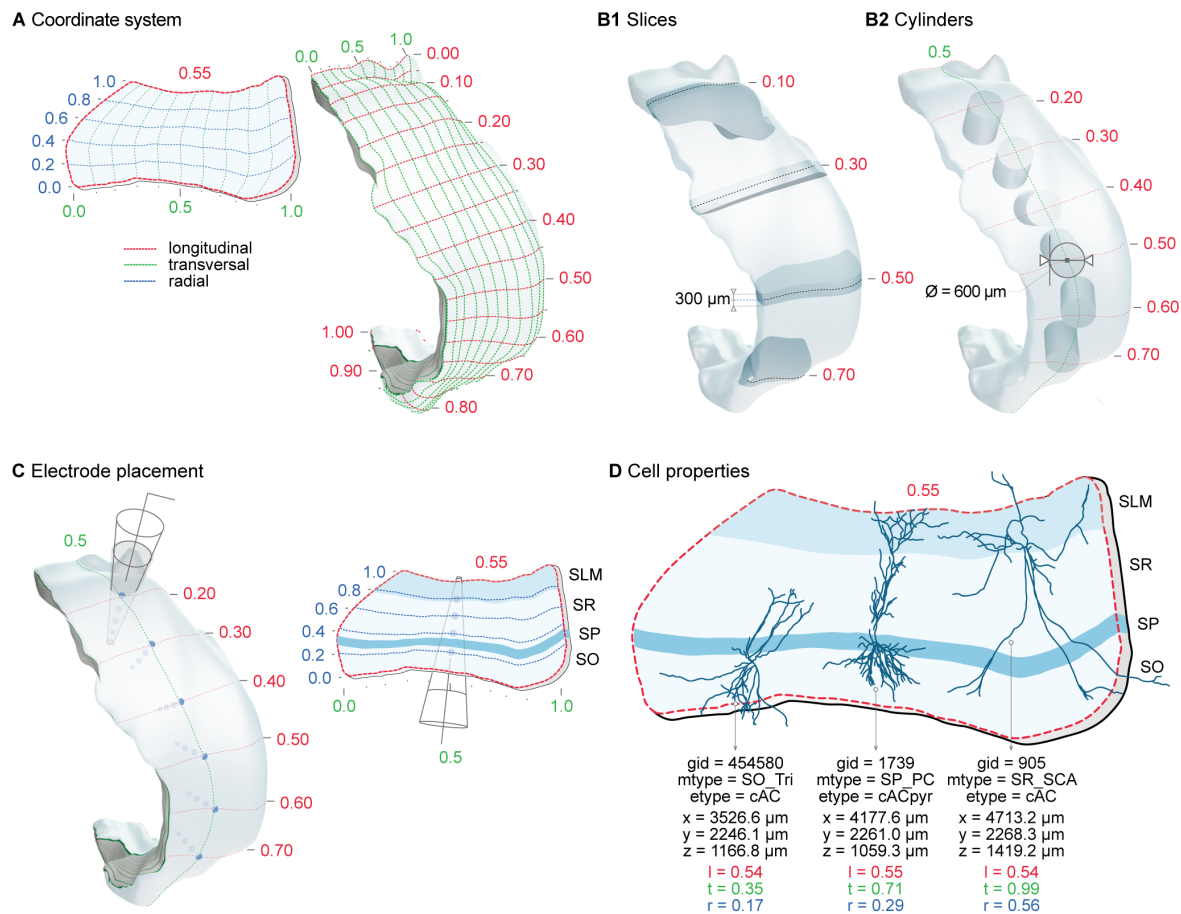

**Figure 2: Custom CA1 parametric coordinates system used as spatial reference for circuit building, circuit segmentation, and for simulation experiments.** A. Longitudinal (l, red), transverse (t, blue) and radial (r, green) axes of the CA1 volume are defined parametrically in range [0,1]. Left: Slice from volume shows radial depth from SO/alveus (r=0) to SLM/pial (r=1) and transverse extent from CA3/proximal CA1 (t=1) to distal CA1/subiculum (t=0) boundaries. Right: Full volume shows surface grid of transverse vs longitudinal axes. B. Circuit segmentation for analysis and simulation. (B1) Coordinates system used to select CA1 slices of a given thickness at specific locations along longitudinal axis. (B2) Coordinate system used to select cylinder of a given surface diameter throughout entire depth of CA1 at specific positions along longitudinal axis. C. Extracellular electrode placed at a given surface position (right) and channels at selected laminar depth (left) in CA1 volume. D. Each neuron in the circuit defined by a unique general identifier (gid), its morphological type (m-type), electrical type (e-type), spatial xyz-coordinates and parameterized ltr-coordinates.

191 Once we had defined the volume, we populated it with the single cell models according to our constraints  
 192 on cell composition (Figure S8A-B, Table S3). Despite the multiple constraints of the cell placement,  
 193 we could include 2,523 neuron morphologies out of the 2,592 in the morphology 25,355 neuron models  
 194 out of the 26,112 in the neuron model library into the volume. Subsequently, we validated the cell  
 195 composition ( $R = 0.999$ ,  $p = 1.31 \times 10^{-28}$ ) and pyramidal cell density to guarantee a consistency  
 196 with input data (Figure S9B-C, Table S3). We also validated cell densities using an additional dataset

197 (Figure S9C, Table S5). The discrepancies can be explained by the absence of some cell types and by  
198 our strategy to compensate for this lack by increasing the number of cells in other layers. In fact, since  
199 most of our reconstructions were experimentally sampled from the SP, the density in SP is higher than  
200 the value reported in literature while it is lower in other layers. Despite these discrepancies, we have a  
201 good match with experimental data ( $R = 0.999$ ,  $p < 0.0001$ ) (Figure S9C).

202 We positioned the cells following a series of rules that describe how different neurite types target the  
203 different layers (Figure S8C-D, Table S6), and we validated the resulting cell placements visually (Figure  
204 S9A). In general, cells in our model follow the curvature of the hippocampus and the different parts of  
205 the cells target the expected layers. However, a closer look may reveal several artifacts. First, some  
206 branches can be present outside the volume. In some cases, there is clear experimental evidence that  
207 neurites extend beyond CA1. For example, the PC axons and OLM dendrites invade the alveus, back-  
208 projecting neurons project to CA2, CA3 and DG. In other cases, there is no clear evidence that the  
209 biological morphologies comply with the layer boundaries. Another artifact is that neurites may not  
210 follow the exact curvature of the layers. Experimentally, cells were sampled from some specific areas  
211 but in the model, they may be positioned in locations with different curvatures. We could overcome  
212 these two limitations with morphology synthesis (Kanari et al., 2022), but this approach is beyond the  
213 scope of this paper.

214 To connect the placed neurons, we used the connectome algorithm previously described in Reimann  
215 et al. (2015) and initially applied in the cortical model of Markram et al. (2015). This algorithm  
216 has been demonstrated to recreate higher-order topological features (Gal et al., 2017). In brief, the  
217 algorithm searches for co-localization of axon and postsynaptic neurons. To identify a potential synapse  
218 (touch or apposition), segments have to be within a certain distance (maximum touch distance). After  
219 identifying all potential synapses, a subsequent step (pruning) discards those that exceed the known  
220 bouton densities (Table S7) and number of synapses per single axon connection (Table S9). While this  
221 algorithm was originally developed for cortical connections, we found that it generalized effectively to  
222 the hippocampus with an important modification.

223 Based on the maximum touch distances used in the cortex model of  $2.5\ \mu\text{m}$  and  $0.5\ \mu\text{m}$  for pyramidal cells  
224 (PCs) and interneurons (INTs), respectively, interpreted as the presence or absence of dendritic spines,  
225 our CA1 model showed that PCs predominantly made their synapses with other PCs (97.4%) rather than  
226 with INTs (2.6%). This finding is significantly different from experimental evidence in the CA1 (PC:  
227 39.2%, INT: 53.8%, unknown: 6.9%, scaled up after distributing the unknown cells proportionally to  
228 reach a ratio of PC: 42.2%, INT: 57.8%) (Takács et al., 2012). We reasoned that this large discrepancy  
229 with experimental data could not be explained solely by the absence of certain cell types in our model.  
230 Instead, we hypothesized that there might be another biological mechanism that makes the connections  
231 among PCs less probable and the connections between PCs and INTs more probable than chance. Since  
232 we did not have a complete understanding of the underlying mechanism, we decided to optimize the  
233 maximum touch distance and found that a value of  $1.0\ \mu\text{m}$  and  $6.0\ \mu\text{m}$  for the distances to PCs and  
234 INTs, respectively, represented the minimum values that allowed us to match experimental data and  
235 give some flexibility in the subsequent synapse pruning (see Supplementary methods for details).

236 Once the connectome had been constrained, it consisted of about 821 million synapses. We validated



237 and analyzed it extensively to make predictions about uncharacterized pathways (Figures S11, S12, S13,  
238 and S14). First, we validated the bouton density and number of synapses per connection to confirm  
239 that we could still match the data we used to constrain the connectome (bouton density:  $R = 0.909$ ,  
240  $p = 0.0120$ ; number of synapses per connection:  $R = 0.992$ ,  $p = 2.41 \times 10^{-9}$ , Figure S11 and Tables S7  
241 and S9). We observed that distributions of connection probability (Figure S12A), convergence (Figure  
242 S13A) and divergence (Figure S14A) had the same skewed shape obtained experimentally (Giacopelli  
243 et al., 2021). In the case of connection probability, experimental data did not allow comparison (Figure  
244 S12C, Table S8). Typically, only the slice thickness and the maximum distances between neuron pairs  
245 tested was given. For convergence, we compared our results with Megias et al. (2001) to validate the  
246 synapses on different compartments of pyramidal cells and our model appears to be in a good agreement  
247 with reported values ( $R = 0.988$ ,  $p = 0.012$ , Figure S13C). For divergence, we had more datasets. First,  
248 for several m-types, we had the total number of synapses they form (Table S10). However, the model did  
249 not match the experimental data well ( $R = 0.524$ ,  $p = 0.2864$ , Figure S14C). Many factors may have  
250 contributed to this difference: e.g., the small sample size in many experiments (but also in the model  
251 since we started from the few example reconstructions), or high variability in axon lengths preserved in  
252 the experimental slices. We compared divergence also in terms of the percentage of synapses formed  
253 with PCs or INTs (Figure S14D, Table S11) and validated distribution of diverging synapses in the  
254 different layers (SO:  $R = 0.798$ ,  $p = 0.057$ ; SP:  $R = 0.905$ ,  $p = 0.013$ ; SR:  $R = 0.813$ ,  $p = 0.049$ ;  
255 SLM:  $R = 0.999$ ,  $p = 4.11 \times 10^{-8}$ , Figure S14E, Table S12).

256 Starting from anatomical connections, we defined synaptic parameters following the methodology de-  
257 scribed in Ecker et al. (2020), which involved integrating the available datasets into a model of synaptic  
258 transmission encompassing stochastic neurotransmitter release and short-term plasticity (STP) (Figure  
259 S15). Since we did not make changes to the synapse model architecture, we used most of the parameters  
260 identified by Ecker and colleagues. In Tables S13 and S14, we report the values of the pathway-specific  
261 model parameters for the 22 classes of pathways we have identified. In addition, we performed two  
262 validations to determine how close to experimental data the model is in terms of post-synaptic poten-  
263 tial (PSP) amplitudes (Figure S15D,  $R = 0.999$ ,  $p = 1.65 \times 10^{-19}$ ) and post-synaptic current (PSC)  
264 coefficient of variation (CV) of the first peak (Figure S15E,  $R = 0.840$ ,  $p = 0.018$ ) for the pathways  
265 with available electrophysiological recordings.

266 After having constrained and validated the synapses, the CA1 network was essentially fully constructed.  
267 However, an isolated CA1 does not have substantial background activity, and normally the network is  
268 driven by external inputs. In the following section, we describe the reconstruction of Schaffer collaterals,  
269 a major input to CA1. This input provides the largest proportion of excitatory synapses to CA1 and  
270 accounts for 92% of synapses in the model.

### 271 **2.1.2 Reconstruction of Schaffer collaterals (SC)**

272 CA1 is not known to contain pacemaker cells and the only spontaneous activity is due to the spontaneous  
273 synaptic release (Le Bon-Jego & Yuste, 2007). While we can still use the model to reproduce experiments  
274 where currents are artificially injected, the capability of the model was augmented with the reconstruction  
275 of Schaffer collaterals, the most studied pathway in the hippocampus (Dumas et al., 2018; Szirmai et al.,  
276 2012).

277 First, to reconstruct the anatomy of Schaffer collaterals, we constrained the number of CA3 PCs ap-  
278 plying the ratios between CA3 PCs and CA1 PCs, as reported by Bezaire and Soltesz (2013), resulting  
279 in 267,238 presynaptic neurons. We modeled each CA3 pyramidal cell to have the same probability  
280 of contacting CA1 cells regardless of their longitudinal positions (Table S15) since we had scarce to-  
281 pographical data. We distributed synapses uniformly along the transverse and longitudinal axes, while  
282 along the radial axis, we followed a layer-wise distribution as reported by Bezaire and Soltesz (2013)  
283 (Figure 3A-C). In addition, we constrained the convergence of SC synapses on PCs and interneurons  
284 to mean values of 20,878 and 12,714, respectively (Bezaire & Soltesz, 2013). The resulting Schaffer  
285 collateral input added 9,122 billion synapses to CA1, 11.1 times more numerous than intrinsic synapses.  
286 As expected, mean synapse convergence on PCs and interneurons matches experimental values used as  
287 constraints (one-sample t-test,  $p = 0.957$  for PCs and  $p = 0.990$  for INTs). Interestingly, the variability  
288 in the model is comparable with the upper and lower limits identified experimentally by Bezaire and  
289 Soltesz (2013) (model PC:  $20,878 \pm 5,867$  synapses and experimental PC: 13,059 - 28,697, model  
290 INT:  $12,714 \pm 5,541$  and experimental INT 7,952 - 17,476, Figure 3D-E). Most of the connections  
291 between each CA3 PC and each CA1 neuron have a single synapse ( $1.0 \pm 0.2$  synapses/connection,  
292 Figure S16A), coherent with what has been previously reported (Bezaire & Soltesz, 2013). Finally, the  
293 resulting divergence from a single CA3 PC is  $34,135 \pm 185$  synapses (Figure S16A), close to the higher  
294 end of the ranges measured by Li et al. (1994), Sik et al. (1993), and Wittner et al. (2007) (15,295 -  
295 27,440, Figure S16B).

296 We found limited data on synaptic parameters for the CA3-CA1 pathway in the literature, particularly in  
297 relation to CA1 interneuron recordings, making parameterizing the synaptic input especially challenging  
298 (Tables S16 and S17). This can be partly explained because the CA3 afferent pathway is sparsely  
299 connected to CA1, so the chance of obtaining paired CA3-CA1 neuronal recordings is small between  
300 PC-PC and much smaller from PC to interneurons (Debanne et al., 1995; Milstein et al., 2015; Sayer  
301 et al., 1990; Wierenga & Wadman, 2003). Accordingly, rather than applying the usual procedure for  
302 synaptic parametrization (Ecker et al., 2020), instead we considered SC→PC and SC→INT projections  
303 separately. In both cases, we set the short-term plasticity (STP) parameters according to Wierenga and  
304 Wadman (2003). Then, we ran a two-step procedure where we used the available data to optimize the  
305 missing parameters (Figure S16C). Finally, we validated SC projections using Sasaki et al. (2006), where  
306 the authors examined the basic input-output (I-O) characteristics of SC projections *in vitro*.

307 For SC→PC synapses, the first step optimized the peak synaptic conductance ( $0.85 \pm 0.05$  nS) and the  
308 size of the readily releasable pool  $N_{RRP}$  (12 vesicles) by matching the distribution of EPSP amplitudes  
309 as measured by Sayer et al. (1990) (Figure 3F, experiment:  $0.14 \pm 0.11$  mV, CV = 0.76, model:  
310  $0.15 \pm 0.12$  mV, CV = 0.80). We also performed a z-test to compare experimental and model EPSP  
311 amplitudes ( $p = value: 0.709$ ). The second step optimized the values of rise and decay time constants  
312 of AMPA receptors (respectively 0.4 ms and  $12.0 \pm 0.5$  ms) by matching the EPSP dynamics as  
313 reported experimentally by Sayer et al. (1990) (Figure S16C, 10-90% rise time model:  $5.4 \pm 0.9$  ms and  
314 experiment:  $3.9 \pm 1.8$  ms, half-width model:  $20.3 \pm 2.9$  ms and experiment:  $19.5 \pm 8.0$  ms, decay time  
315 constant model:  $19.5 \pm 2.5$  ms and experiment:  $22.6 \pm 11.0$  ms).

316 In the case of SC→INT synapses, we followed the distinction identified by Glickfeld and Scanziani (2006)



317 and divided the interneurons into cannabinoid receptor type 1 negative (CB1R-) and positive (CB1R+).  
318 First, we optimized the peak conductance (CB1R-:  $15.0 \pm 1.0$  nS, CB1R+:  $1.5 \pm 0.1$ ) and the  $N_{RRP}$   
319 (CB1R-: 2, CB1R+: 8) to obtain the  $EPSC_{INT}/EPSC_{PC}$  ratios similar to experimental measurements  
320 (Glickfeld & Scanziani, 2006) ( $EPSC_{CB1R-}/EPSC_{PC}$  model  $6.950 \pm 9.200$  and experiment  $8.15 \pm$   
321  $6.00$ ,  $EPSC_{CB1R+}/EPSC_{PC}$  model  $1.27 \pm 1.78$  and experiment  $1.09 \pm 1.44$ , Figure 3G-H). We also  
322 made the comparison between model and experimental data using z-test (CB1R+:  $p$ -value = 0.18,  
323 CB1R-:  $p$ -value = 0.06). Then, we optimized the rise and decay constants of AMPA receptors  
324 (respectively 0.1 ms and  $1.0 \pm 0.1$  ms for all interneurons) to match the correct timing in the EPSP-  
325 IPSP sequence (Pouille & Scanziani, 2001) (model:  $2.69 \pm 1.18$  ms, experiment:  $1.9 \pm 0.6$ , Figure  
326 S16D). This short latency between the EPSP (triggered by the SC→PC stimulation) and the IPSP  
327 (triggered by the di-synaptic loop SC→INT→PC) makes effective feedforward inhibition possible, a key  
328 aspect for the transmission of oscillations from CA3 to CA1.

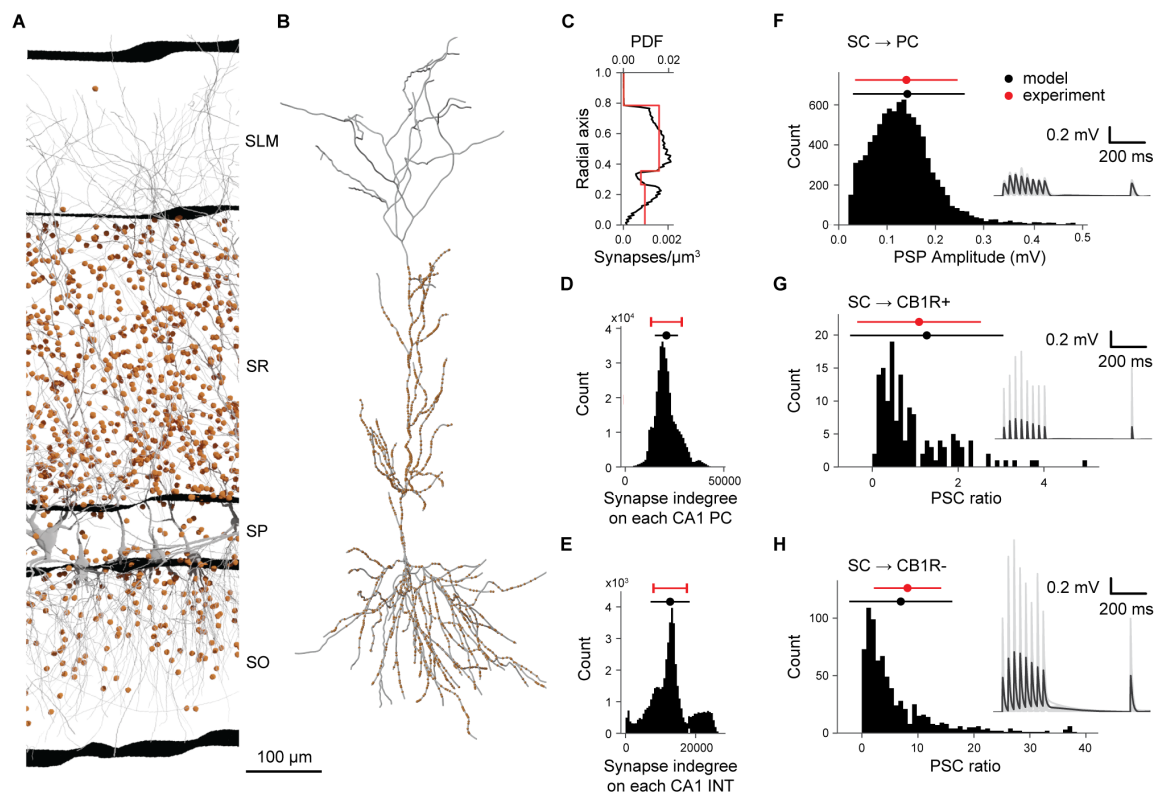

**Figure 3: Schaffer collaterals anatomy and physiology.** A. Section of a slice of the dorsal CA1 showing 5 neurons in gray and SC synapses in orange (10% of the existing ones). B. Example of SC synapse placement (orange dots) on one reconstructed PC (in grey). C. Density of SC synapses (lower x axis, reported in synapses/ $\mu\text{m}^3$ ) and probability density function (upper x axis) at different depths (radial axis percentage, from 0 to 1). The black line reports the measured densities in the reconstructed circuit, while the red line indicates the values measured experimentally (one value per layer). D-E. Distributions of afferent synapses from SC to pyramidal cells (D) and interneurons (E) ( $20,878 \pm 5,867$  and  $12,714 \pm 5,541$  synapses, respectively). F. Fitting results of SC  $\rightarrow$  PC synapses. The plot reports the distribution of PSP amplitudes computed over the 10,000 pairs of pre and postsynaptic neurons. On top, experimental (in red) and model (in black) mean and standard deviation values are reported with a dot and a bar, respectively. G-H. Fitting results of SC  $\rightarrow$  CB1R+ (G) and SC  $\rightarrow$  CB1R- interneurons synapses. CB1R+ interneurons are PPA, CCKBC, and SCA, while other interneurons are CB1R-. The plots report the distribution of the PSC ratio computed over the 1000 pairs of SC  $\rightarrow$  INT, grouped by interneuron class (i.e., CB1R+ or CB1R-). Insets in panels F-H report voltage membrane traces of 10 randomly selected pairs of SC  $\rightarrow$  PC, SC  $\rightarrow$  CB1R+, and SC  $\rightarrow$  CB1R- interneurons, respectively. The presynaptic SC is stimulated to fire 8 times at 30 Hz, plus a recovery pulse after 500 ms from the last spike of the train. Solid black lines represent mean values, and shaded gray areas the standard deviation. Scale bars: 0.2 mV and 200 ms.

329 To validate the SC projections, we compared the model results with the I-O characteristics reported  
 330 in Sasaki et al. (2006). I-O of SC-CA1 is thought to be dominated by feedforward inhibition, which  
 331 increases the dynamic range of the network and linearizes the I-O curve (Pouille et al., 2009; Sasaki et  
 332 al., 2006). Application of a gamma-aminobutyric acid receptor ( $\text{GABA}_A$ R) antagonist such as gabazine

333 blocks the feedforward inhibition and drastically reduces the dynamic range of the network resulting in  
334 an I-O curve that saturates very quickly. We set up the simulations to be as close as possible to the  
335 experimental conditions (slice of 300  $\mu\text{m}$ ,  $\text{Ca}^{2+}$  2.4 mM,  $\text{Mg}^{2+}$  2.4 mM, 32°C) (Figure 4A). To match  
336 the methodology of Sasaki et al. (2006), we randomly sampled 101 neurons in the slice to find how  
337 many SC axons were required to make all 101 fire. As in the experiment, this represented respectively  
338 100% of the output and 100% of input. From this point, we tested a decreasing number of SC fibers  
339 and recorded how many neurons fire. To assess the role of feedforward inhibition, we repeated the  
340 simulation by cutting the connections from interneurons, mimicking the effect of gabazine. The model  
341 I-O curves in both control and "no GABA" conditions approximated the experimental measurements  
342 well (Figure 4B). The model captured the quasi-linearization of the I-O response in control conditions  
343 (Pearson R = 0.992, p-value =  $2.56 \times 10^{-9}$ ). Looking at the behavior following the stimulation at 50%  
344 of this intensity (Figure 4C) in control conditions, the spiking activity of CA1 SP neurons is rather weak  
345 and rapidly suppressed by the feedforward inhibition. However, without GABAergic inhibition, CA1 SP  
346 neurons fire at high frequency (up to 200 Hz) and for more than 50 ms.

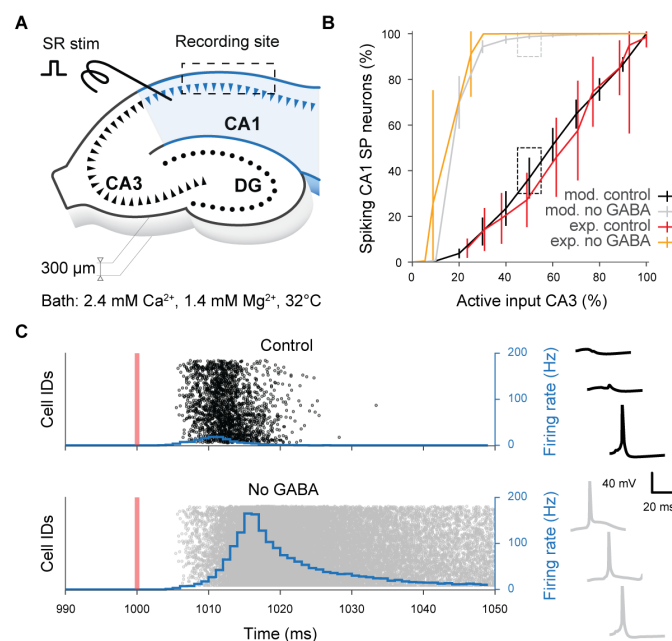

Figure 4: **Schaffer collaterals validation.** Effect of the feedforward inhibition on the input-output relationship of the network illustrated in a slice experiment. A. The illustration (redrawn from Figure 1A, (Sasaki et al., 2006)) shows the *in silico* experimental setup tailored to the experiment presented in Sasaki et al. (2006). B. Without GABA (orange line for experimental data, gray for model results), most of the SP neurons are recruited as soon as the number of SCs increases. With GABA (red line for experiments, black for model), the feedforward inhibition linearizes the response allowing a more modular activation of the cells in response to an increasing input. The dashed boxes identify the condition (50% of active SC) that is used to show the model's results in panel C. C. Raster plots of SP neurons in response to the SC stimulation (orange vertical line) with the overlaying firing rate (blue). On the right, membrane voltage traces of three randomly selected SP neurons in control (black) and no GABA (gray) conditions. Scale bars: 40 mV and 20 ms.

347 While the Schaffer collaterals do not represent the only input to CA1, they can account for the majority  
348 of the excitatory synapses and represent a prototype for modeling other inputs. Finally, as demonstrated  
349 in the Simulation and Applications section, the SC allows us to deliver realistic synaptic inputs to the  
350 network and significantly increases the capabilities of the model. Indeed, network dynamics are not only  
351 shaped by the trafficking of spikes among regions, but there is an important phenomenon that has a  
352 profound impact on the network behavior: neuromodulation.

### 353 2.1.3 Cholinergic modulation

354 The behavior of the hippocampus is shaped by several neuromodulators, with acetylcholine (ACh)  
355 among the most studied. Cholinergic fibers originate mainly from the medial septum and have been  
356 correlated with phenomena such as theta rhythm, plasticity, memory retrieval and encoding, as well as  
357 pathological conditions such as Alzheimer's disease (Dannenberg et al., 2017). This section describes  
358 the reconstruction of a phenomenological model of ACh, quantifying the effects of ACh on cells and  
359 synapses, and developing a novel method to integrate available experimental data (Tables S18 and  
360 S19, Figure 5A-B). The data used to build the model was obtained from *in vitro* application of various  
361 cholinergic agonists such as ACh and carbachol (CCh); here we assume that their effects are comparable  
362 (Colangelo et al., 2019).

363 Our method allows the integration of disparate datasets, including the effects of ACh on resting mem-  
364 brane potential and firing frequency. This is achievable because we can estimate the net current that is  
365 required to evoke the corresponding changes in membrane potential or firing rate, for a given concen-  
366 tration of ACh.

$$I_{depol} = \frac{0.567ACh^{0.436}}{100^{0.436} + ACh^{0.436}} \quad (1)$$

367 where  $I_{depol}$  is the depolarizing current (in nA) and ACh is the neuromodulator concentration in  $\mu\text{M}$  (fit  
368  $R^2 = 0.691$ ,  $N = 28$ , Figure 5AC).

369 We also include the effect of ACh on synaptic transmission, where ACh seems to act principally at the  
370 level of release probability (M. E. Hasselmo, 2006; Tsodyks & Markram, 1997; D. Yang et al., 2021).

$$U_{SE} = \frac{1.0ACh^{-0.576}}{4.541^{-0.576} + ACh^{-0.576}} \quad (2)$$

371 where  $U_{SE}$  is the release probability. (fit  $R^2 = 0.667$ ,  $N = 27$ , Figure 5BD).

372 Once we had constrained the effect of ACh on neuron excitability and synaptic transmission, we validated  
373 the effect of ACh at the network level. Available data (Table ??) allowed a qualitative, although not  
374 a precise validation of the model. In particular, we performed *in silico* bath application of ACh and  
375 simulated a wide range of concentrations (from 0  $\mu\text{M}$  (i.e., control condition) to 1000  $\mu\text{M}$ ) (Figure 5E-  
376 F). We observed a sub-threshold increase in the membrane potential of all neurons for values of ACh  
377 lower than 50  $\mu\text{M}$ , without any significant change in spiking activity. At intermediate doses (i.e., 100  $\mu\text{M}$

378 and 200  $\mu\text{M}$ ), the network shifted to a more sustained activity regime. Here, we observed a generalized  
379 increase in firing rate as ACh concentration increased and a progressive build-up of coherent oscillations  
380 whose frequencies ranged from 8 to 16 Hz (from high theta to low beta frequency bands). The correlation  
381 peak between CA1 neurons occurred at 200  $\mu\text{M}$  ACh (Figure 5G-H). At very high concentrations (i.e.,  
382 500  $\mu\text{M}$  and 1000  $\mu\text{M}$ ) we observed a decrease in the power of network oscillations, which was further  
383 confirmed by analysis of local field potential (LFP) (Figure 5I). Power spectral density (PSD) analysis  
384 showed a maximum absolute amplitude for 200  $\mu\text{M}$  ACh with a peak frequency of  $\sim 15$  Hz (Figure  
385 5J-K). Higher concentrations decreased the maximum amplitude of the PSD while the peak frequency  
386 converged toward 17 Hz (Figure 5K).

387 Thus, we predict the emergence of three different regimes at low, intermediate, and high cholinergic  
388 stimulation. The heterogeneity of the methodologies used to establish ACh influences on network  
389 activity confounds the interpretation of the reports of the effects of ACh, and it is yet unclear whether  
390 the network behavior we observe is validated by experimental findings. For instance, some research  
391 shows that cholinergic agonism induces oscillations in isolated CA1 slices (Pietersen et al., 2014), but  
392 several other studies show that while CCh evokes oscillations in CA3, and these can be transmitted to  
393 CA1 via SC, it fails to induce oscillations in the CA1 region (Bianchi & Wong, 1994; Fellous & Sejnowski,  
394 2000; Fisahn et al., 1998; J. H. Williams & Kauer, 1997). Arguably, there are no evident reasons to  
395 justify the observed discrepancy, even though the possibility that CA1 mini slices were contaminated by  
396 adjacent regions cannot be excluded. Moreover, even though *in vivo* ACh release and the emergence  
397 of theta waves in the CA1 region are tightly correlated (Zhang et al., 2010), some authors report  
398 that ACh's role is to increase the power and the coherence of the oscillations rather than generating  
399 them (Vandecasteele et al., 2014). For a more exhaustive recapitulation of the different findings and  
400 the methodologies applied, we redirect the reader to Table S20. In our CA1 model, progressive ACh  
401 application induced a build-up of oscillatory activity, differently than in a previous model of neocortical  
402 ACh release (Ramaswamy et al., 2018), where cholinergic stimulation caused desynchronization of  
403 network activity at comparable concentrations. It's interesting to notice that even though the effects of  
404 ACh release are roughly the same (generalized depolarization and decreased synaptic release probability)  
405 the impact on network activity is drastically different in the two reconstructed microcircuits.

406 Capturing the relationship between cholinergic agonist application and subsequent local effects allows  
407 a more rigorous description of the phenomenon and the prediction of the effect of virtually any ACh  
408 concentration at synapse, neuron, and network level. The introduction of ACh allows the model to  
409 reproduce a larger set of experiments in which ACh or its receptor agonists are necessary (see, for  
410 example, Sections 2.2.1 and 2.2.2). Finally, the model of ACh can be used as a prototype to introduce  
411 the effects of other neuromodulators.

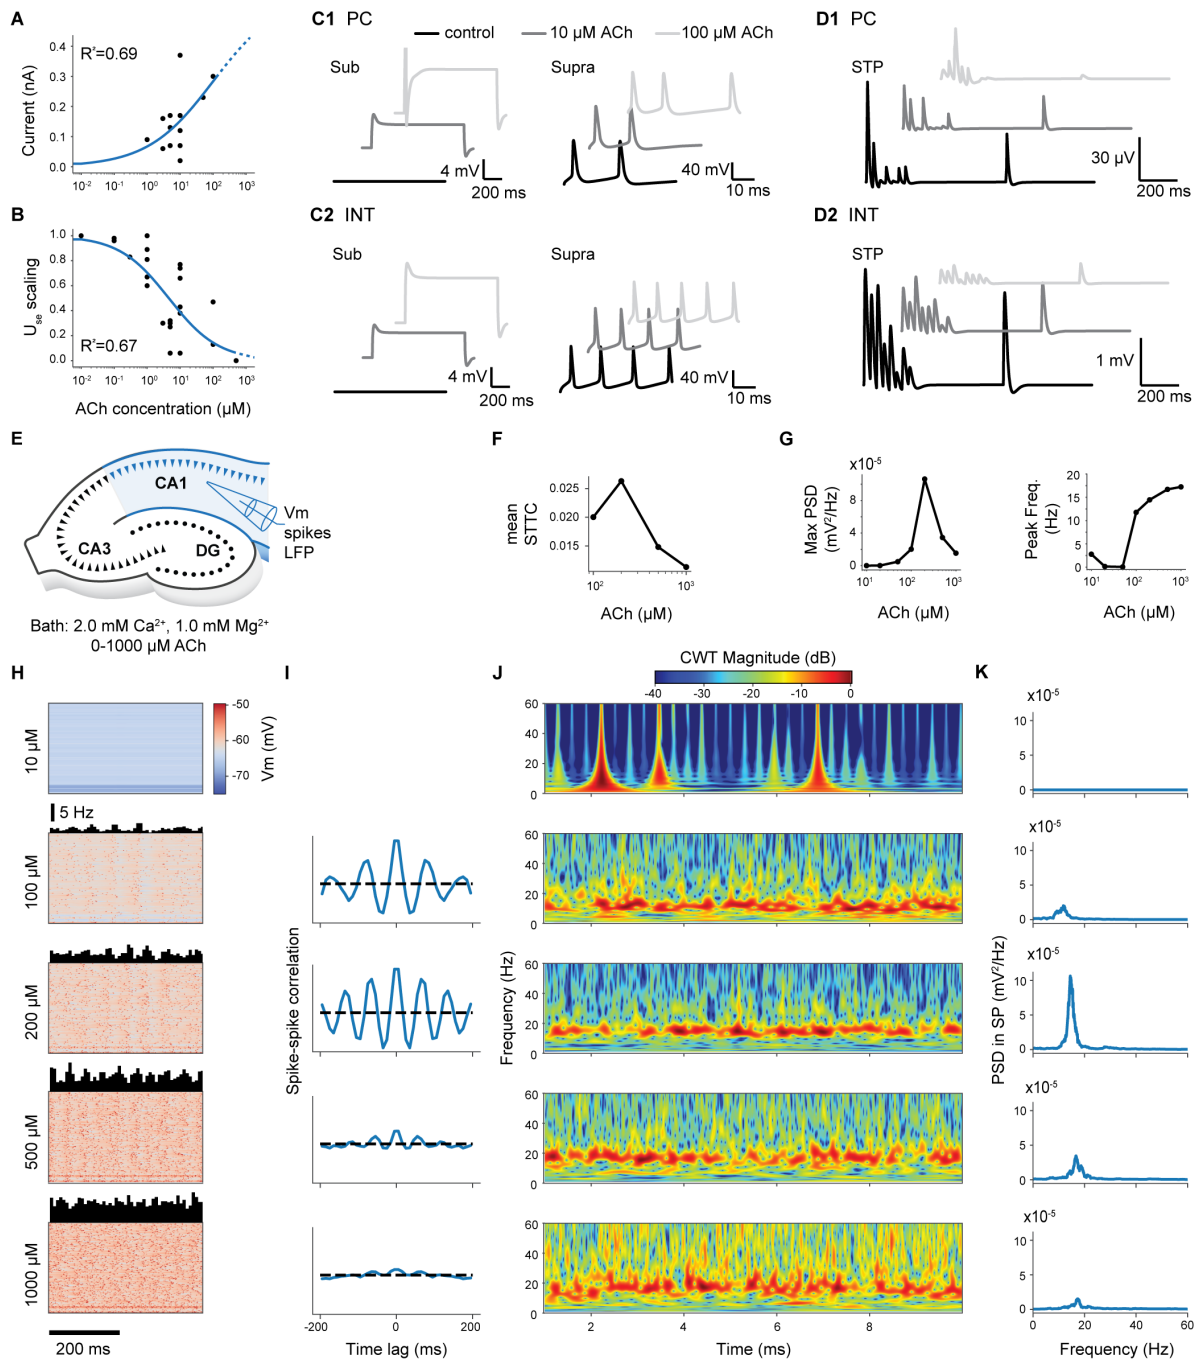

Figure 5: **Acetylcholine modeling.** (for legend, see next page)



Figure 5 (*previous page*): **Acetylcholine modeling**. A. Dose-response modulation of neuronal excitability caused by ACh. Experimental data points (black dots) are extracted from the literature and the blue curve represents the fitted equation describing the relationship between ACh concentration (in  $\mu\text{M}$ ) and the depolarizing current (in nA). The dashed part of the curve indicates regions outside available experimental data. B. Dose-response modulation of synaptic release. Same as in A, but describing the relationship between the ACh concentration and the scaling of the  $U_{SE}$  parameter (adimensional). C. Example traces for PC (C1) and interneurons (C2) in sub-threshold and supra-threshold conditions, with different concentrations of ACh (control: black, 10  $\mu\text{M}$ : dark gray, and 100  $\mu\text{M}$ : light gray). D. Example traces showing the STP dynamics for PC (D1) and interneurons (D2) at different concentrations of ACh. E. The illustration shows the *in silico* experimental setup to analyze network effects of CCh. Different concentrations of CCh are applied to the circuit, and multiple types of recordings made in the CA1 (membrane voltage, spike times, LFPs). F. The voltage of 100 randomly selected neurons during 500 ms of simulation at different levels of ACh. The upper histograms show the instantaneous firing rate (in bins of 10 ms). G. Mean spike time tiling coefficient (STTC) values computed for 10,000 pairs of CA1 neurons with spike trains lasting 9 s as a function of CCh concentration. H. Spike-spike correlation histograms (bin = 10 ms) computed for 10,000 pairs of CA1 neurons. I. LFP measured in SP computed in simulations at four different ACh levels. Colors correspond to different levels of continuous wavelet transform (CWT). J. PSD of the LFPs reported in panel I. K. Maximum of the LFP power spectrum density (PSD, in  $\text{mV}^2 \text{Hz}^{-1}$ ) and location of the peak frequency (in Hz) as a function of ACh concentration.

## 412 2.2 Model simulation and applications

413 In this section, we explain how to use the model to set up simulation experiments, accurately replicate  
414 experimental setups, and address scientific questions. A simulation experiment is essentially a model  
415 of the experimental setup that is reproduced with as much accuracy as possible. As presented in the  
416 reconstruction section, the model contains features that allow us, for example, to make slices of a certain  
417 thickness, change extracellular concentration of ions, change temperature, and enable spontaneous  
418 synaptic events. Here, we show several simulations with particular emphasis on theta oscillations, a  
419 prominent network phenomenon observed in the hippocampus *in vivo* and related to many behavioral  
420 correlates (Buzsáki, 2005). Despite extensive research on hippocampal theta oscillations, the scientific  
421 community has yet to converge on a single model, and conflicting evidence remains. However, this  
422 represents an opportunity to use the model to integrate existing knowledge into a coherent framework.  
423 Additionally, the model also allows us to explore many different ramifications of the initial scientific  
424 question. Following one of these ramifications, in the second part of the simulation section, we go  
425 beyond the theta oscillations and test whether a wider range of frequencies can pass more reliably  
426 through SC than other pathways.

### 427 2.2.1 Theta oscillations

428 During locomotion and REM sleep, CA1 generates a characteristic rhythmic theta-band (4-12 Hz)  
429 extracellular field potential (Goyal et al., 2020; Grastyan et al., 1959; Green & Arduini, 1954; Jung

430 & Kornmüller, 1938; Vanderwolf, 1969). Neurons in many other brain regions such as neocortex are  
431 phase-locked to these theta oscillations (Siapas et al., 2005; Sirota et al., 2008) suggesting hippocampal  
432 theta plays a crucial coordinating role in the encoding and retrieval of episodic memory during spatial  
433 navigation (Buzsáki, 2002, 2005). The activity in each of the different classes of CA1 neurons correlates  
434 with specific phases of the theta cycle suggesting a complex interaction between pathways (see Table  
435 S22): pyramidal cells, OLM, and BS spike during the rising phase, CCKBC and AA discharge before or  
436 at the peak, and PVBC fire in the falling phase of the theta cycle (Fuentelba et al., 2008; Klausberger,  
437 2005; Klausberger et al., 2003, 2004).

438 Yet despite more than eighty years of research, the trigger that generates theta oscillations in CA1  
439 remains unclear. *In vivo* evidence points to a fundamental role of the medial septum (MS) (Colgin, 2013).  
440 MS contains hyperpolarization-activated cyclic nucleotide-gated channel (HCN)-expressing interneurons  
441 that fire rhythmically at theta frequencies and are phase-locked to theta rhythms in the hippocampus  
442 (Hangya et al., 2009). These cells are believed to target CA1 interneurons preferentially (Sun et al.,  
443 2014). GABAergic MS interneurons predominantly target parvalbumin-positive (PV+) interneurons  
444 in CA1 offering a disinhibitory mechanism for theta generation (Müller & Remy, 2018; Sun et al.,  
445 2014). Depth recordings in CA1 have identified two main extracellular current sink-source current for  
446 theta rhythms (Brankack et al., 1993; Kamondi et al., 1998; Kocsis et al., 1999). The strongest active  
447 current sink is located in SLM, where perforant path (PP) input terminates (Kamondi et al., 1998; Ylinen  
448 et al., 1995). The weaker active source-sink is located between SR, where associational and commissural  
449 CA3 axons terminate, and SP, where perisomatic inhibition of pyramidal cells occurs. The cholinergic  
450 antagonist, atropine, can block theta when the PP pathway is bilaterally removed but theta is largely  
451 unaffected when it is intact (Ylinen et al., 1995), suggesting the existence of independent atropine-  
452 resistant and atropine-sensitive theta oscillation generators. More recently, an intrinsic generator has  
453 been considered. Goutagny et al. (2009) recorded spontaneous atropine-resistant theta oscillations in  
454 an *in vitro*, intact, isolated, mouse hippocampal preparation but not in horizontal or transverse slices  
455 prepared from the same tissue. While the amplitude was 10-20% of that *in vivo* (Goutagny et al.,  
456 2009), these theta oscillations were abolished when GABA<sub>A</sub> receptors were blocked suggesting that an  
457 interaction between local pyramidal cells and interneurons might contribute to theta generation.

## 458 **Intrinsic generation**

459 To investigate possible intrinsic mechanisms of theta rhythm generation in CA1 (Goutagny et al., 2009),  
460 we examined three candidate sources of excitation that might induce oscillations: (i) spontaneous  
461 synaptic release or miniature postsynaptic potentials (minis or mPSPs), (ii) homogeneous random spiking  
462 of SC afferent inputs, and (iii) varying bath concentrations of extracellular calcium and potassium to  
463 induce tonic circuit depolarisation. While in their CA1 circuit model Bezaire et al. (2016) reported  
464 random synaptic activity was sufficient to induce robust theta rhythms, in our model we found none  
465 of these candidates generated robust theta rhythms. For minis, we found setting release probabilities  
466 to match empirically reported mPSP rates (Table S21) led to irregular, wide-band activity in CA1 (see  
467 Figure S17). For random synaptic barrage, varying presynaptic rate to match the mean postsynaptic  
468 firing rate of pyramidal cells in Bezaire et al. (2016) resulted in irregular beta-band not regular theta-  
469 band oscillations (see Figures S18 and S19). Meanwhile, for tonic depolarisation, within a restricted



470 parameter range it was possible to generate theta oscillations around 10-12 Hz, but their intensity was  
471 variable and episodic (see Figures S20 and S21).

## 472 **Extrinsic pacemakers**

473 After investigating possible intrinsic mechanisms, we examined whether theta oscillations could be  
474 generated by extrinsic oscillatory sources such as CA3 or by disinhibition via medial septum (MS)  
475 GABAergic projections.

## 476 **CA3 input**

477 To mimic the influence of CA3 theta oscillations in CA1, we generated spike trains in a random subset of  
478 SC axons that were modulated by a sinusoidal rate function with signal frequency (range 4-10 Hz) and  
479 inhomogeneous random Poisson spike times for a range of mean individual SC axon spiking rates (0.1-0.4  
480 Hz). As Goutagny et al. (2009) found that the volume of isolated hippocampus *in vitro* was crucial to  
481 whether theta oscillations were generated or not, we compared simulations performed at different scales  
482 using whole circuit, thick slice circuit, and cylinder microcircuit models (Figure 2).

483 Across all scales of circuit tested, for *in vitro* calcium levels (2 mM) the LFP signal faithfully reproduced  
484 the modulation frequency of the sinusoidal input signal in theta-band. For example, 8 Hz modulated  
485 spike trains delivered via SC axons generated a highly regular 8 Hz LFP signal in CA1 full, thick slice  
486 and cylinder circuit models (Figure 6ABC). In rat CA1, theta oscillation waveforms are typically more  
487 sawtooth-like than sinusoidal (Buzsáki et al., 1985). Waveform asymmetry can be described using the  
488 asymmetry index, which is the log ratio of the duration of the rising and decaying phases of the LFP  
489 oscillation, e.g. in rats the mean index is -0.27 during locomotion and -0.13 during REM sleep periods  
490 (Belluscio et al., 2012). Here we found the generated LFP waveforms were highly asymmetrical with a  
491 fast rise and slower decay (mean asymmetry index =  $-1.34 \pm 0.23$ ; see Figure S22). A strong narrow-  
492 band peak of power at 8 Hz was maintained throughout the entire period of stimulation (Figure 6ABC,  
493 middle columns). Consistent with experimental evidence (e.g. Figure 1b in Goutagny et al., 2009),  
494 first (16 Hz) and second order (24 Hz) harmonics of the theta modulation frequency were also present.  
495 The magnitude of the modulation and harmonic powers were directly proportional to circuit size (Figure  
496 6ABC, middle right column). Current source density (CSD) showed a highly regular alternating current  
497 dipole between layers with a phase reversal between stratum pyramidale and stratum radiatum, similar  
498 to *in vivo* LFP recordings in the absence of perforant pathway input (Figure 6ABC, far right column).  
499 However, at *in vivo* calcium levels (1 mM), while the full circuit showed similar frequency response, it  
500 was around three orders of magnitude less powerful due to the far lower CA1 spiking rate (e.g. in full  
501 circuit, pyramidal cell mean firing rate of  $0.00018 \pm 0.0067$  (1 mM) vs  $0.25 \pm 0.50$  Hz (2 mM); Figure  
502 6D).

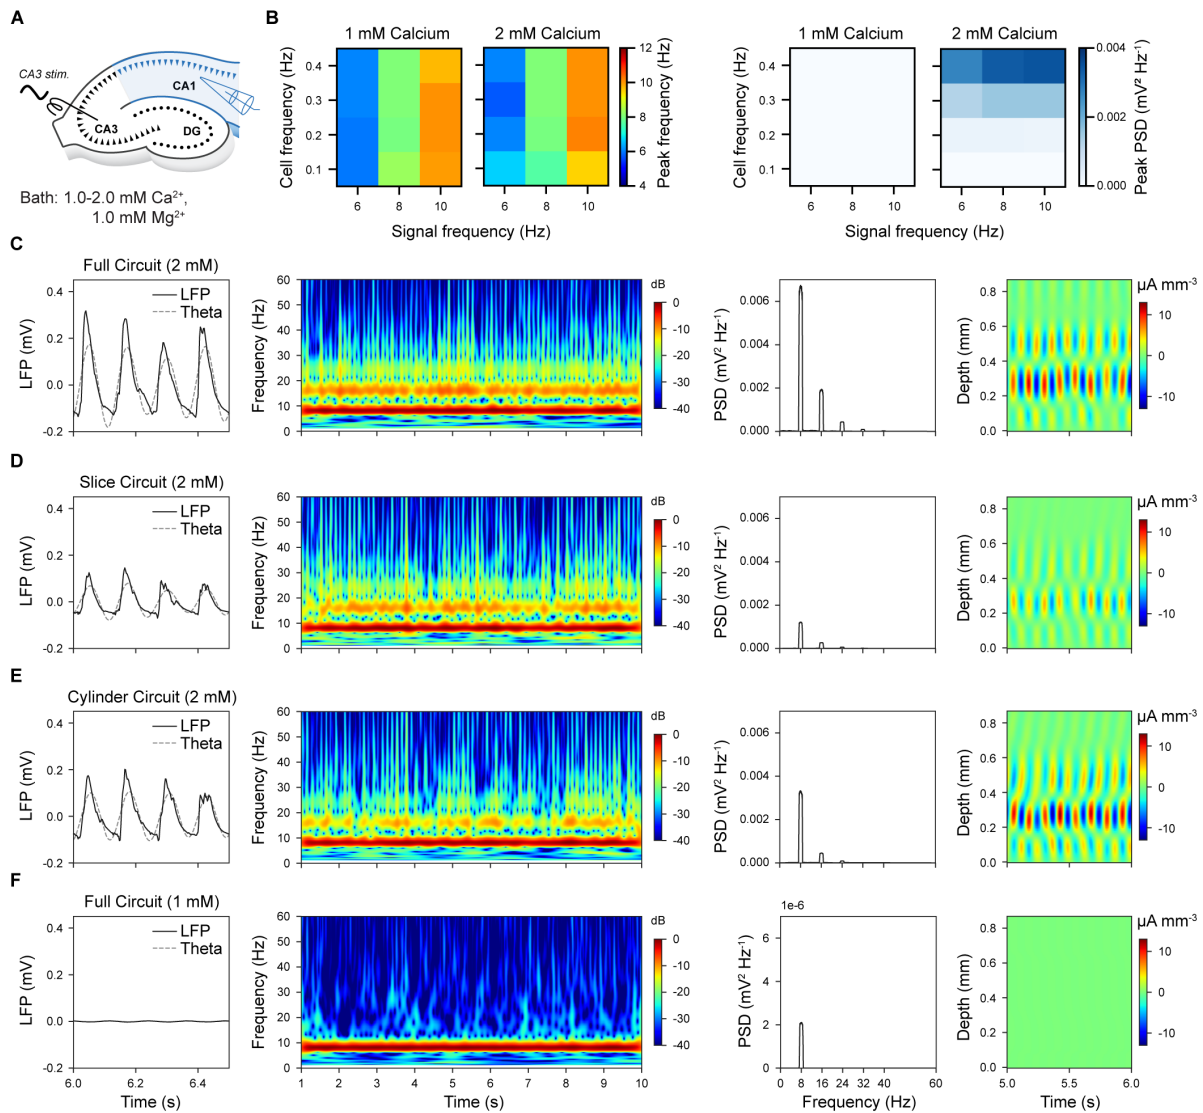

**Figure 6: CA3 theta (8 Hz) oscillatory input entrains CA1 to matched theta oscillation across different scales of circuit. (for legend, see next page)**

Figure 6 (previous page): A. Full circuit model (2 mM calcium). B. Slice circuit model (thickness of 300  $\mu\text{m}$ , 2 mM calcium). C. Cylinder circuit model (radius of 300  $\mu\text{m}$ , 2 mM calcium). D. Full circuit model (1 mM calcium). Far left column, extracellular LFP recordings from stratum pyramidale (SP) show highly regular but asymmetric shape waves at 8 Hz. Left middle column, the Morlet complex wavelet spectrogram shows constant 8 Hz energy with first and second order harmonics present. Right middle column, power spectral density (PSD) shows identical qualitative power distribution independent of circuit scale while magnitude is in direct proportion to circuit size (N.B. panel D has 1000 times smaller y-axis scaling than panels ABC). Far right column, current source density (CSD) analysis of translaminar currents showing stratum pyramidale and stratum radiatum current dipoles alternating at 8 Hz.

504 compared with the phases of theta-band LFP rhythm (theta trough =  $0^\circ$ ), all neuron types were found  
 505 to respond at roughly the same phase of the theta cycle (Figure 7). In a cylinder circuit, for example,  
 506 as the mean rate of SC afferent spiking increased more neurons became phase-locked yielding a denser  
 507 mono-phase distribution for higher signal modulation frequencies (Figure 7A). For example, under stimuli  
 508 with a 0.4 Hz SC mean spiking frequency and 8 Hz signal modulation, CA1 pyramidal cells fired first  
 509 during the mid-rising phase and were followed by all types of interneurons, whose spiking mostly ended  
 510 before peak theta, with bistratified neurons emitting few or no spikes (Figure 7B left). Significantly  
 511 phase-locked neurons had tighter tuning with pyramidal-interneuron phase-ordering (Figure 7B middle).  
 512 When compared with *in vivo* recordings of phase-locked neurons (see Table S22) (Fuentelba et al.,  
 513 2008; Klausberger, 2005; Klausberger et al., 2003, 2004), the mean phase angle of model spiking was  
 514 closely matched for CCK+ basket cells but substantially out of phase for axoaxonic cells (Figure 7B  
 515 right). Although the angular deviation of phase-locking was generally tighter than observed *in vivo*  
 516 (e.g., model vs *in vivo* for SP\_AA  $8.9^\circ$ (n=4) vs  $55.0^\circ$ (n=2), SP\_PVBC  $12.0^\circ$ (n=2) vs  $68.0^\circ$ (n=5), and  
 517 SP\_lvy  $10.9^\circ$ (n=19) vs  $63.1^\circ$ (n=4)).

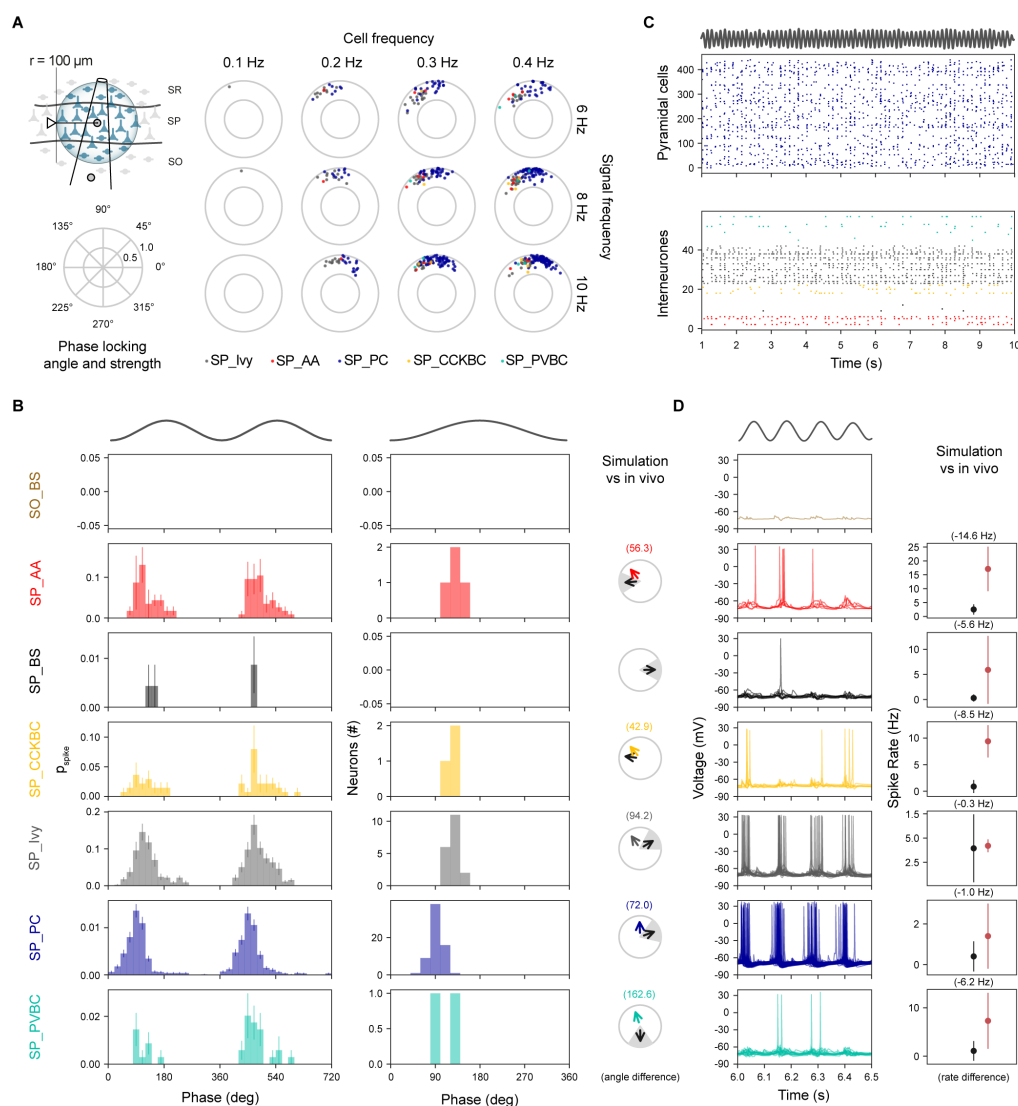

Figure 7: **CA1 morphological types are homogeneously tuned to CA3 theta oscillatory input.** (for legend, see next page)

Figure 7 (*previous page*): A. Phase locking angle and strength for a range of individual SC cell frequencies (columns) and modulation frequencies (rows) shows a single grouping. Neurons for analysis were selected within 100  $\mu\text{m}$  radius of the stratum pyramidale electrode location. B. Phase Modulation. Left: Spike discharge probability of all neurons grouped by morphological type shows they tuned between mid-rising phase and peak of theta LFP rhythm with SP\_PC slightly in advance of interneurons. Middle: phase locked neurons tuning over theta cycle for each morphological class over a single theta cycle is tighter but with the grouping preserved. Right: Experimental validation of phase-locking generally shows poor match to *in vivo* recordings. C. Spiking raster plots over many seconds show strong phase modulated SP\_PC cell spiking (top panel) compared with LFP theta rhythm (trace above plot) with interneuron spiking (bottom panel) of SP\_Ivy cells showing a similar spiking pattern but other interneurons spiking fired more irregularly. D. Intracellular traces from morphological cell types. Left: SP\_PC and SP\_Ivy cells spiking responses were similar, although firing in SP\_Ivy cells was relatively delayed. The firing of other interneuron types overlaps with that of SP\_Ivy cells. Right: All neuronal types except SP\_Ivy cells are less active than *in vivo* during theta rhythms with SP\_Ivy and especially SP\_AA types outside the range recorded in *in vivo*.

518 For *in vitro* calcium levels (2 mM), pyramidal cell spiking was closely aligned to theta LFP rhythm  
519 although individual neurons did not spike at every cycle (Figure 7C top). Ivy cells showed a similar  
520 pattern to pyramidal cells while other types of interneuron participated more sporadically (Figure 7C  
521 bottom). Intracellular voltage traces for pyramidal and ivy cells were also similar albeit with ivy cell  
522 firing slightly later and overlapping with other types of interneurons (Figure 7D left). Mean firing rates  
523 during theta were generally lower than observed *in vivo* except for ivy cells, which was a close match;  
524 axoaxonic, bistratified, and basket cells (CCK+ and PV+) were well below empirical expectations (Figure  
525 7D right). During 8 Hz theta, the pyramidal cell membrane potential was modulated by 1.57-7.34 mV  
526 (for 0.1-0.4 Hz SC axon frequency), consistent with the *in vivo* range (2-6 mV, Ylinen et al., 1995).  
527 When we compared model population synchrony during theta oscillations with *in vivo* data (Csicsvari  
528 et al., 1998), we found that, regardless of circuit size, the percentage of pyramidal cell spiking was a  
529 poor match around the theta trough ( $0^\circ$ ) but was a better match around theta peak ( $180^\circ$ ), while fast-  
530 spiking PV+ basket cells and to a lesser degree axoaxonic cells were under-recruited (see Figure S23).  
531 Overall, for this stimulus the pyramidal-interneuron theta phase order suggests that intrinsic inhibition  
532 was activated more powerfully by recurrent than by afferent excitation.

### 533 **Medial septum input**

534 Medial septum (MS) has for many decades been considered a main generator of CA1 theta rhythms  
535 (Colgin, 2013). In the absence of a detailed model of MS cholinergic and GABAergic projections to CA1,  
536 we attempted to reproduce its *in vivo* effects by (i) setting an *in vivo* extracellular calcium concentration  
537 (1 mM), (ii) applying a tonic depolarizing current (% of rheobase current) to all neurons to represent  
538 *in vivo* background activity, (iii) introducing an additional current to mimic the depolarizing effect of  
539 an arrhythmic release of ACh from the cholinergic projection (see ACh section), and (iv) applying a  
540 theta frequency sinusoidal hyperpolarizing current stimulus only to PV+ CA1 neurons to represent the  
541 rhythmic disinhibitory action of the GABAergic projection (see Figure 8A).

542 Prior to the onset of the disinhibitory stimulus ("MS OFF"), the global tonic depolarization resulted in  
 543 weak, irregular beta-band LFP activity in CA1 but after its onset ("MS ON"), it induced a strong and  
 544 sustained, regular theta oscillation matching the frequency of the hyperpolarizing stimulus (see Figure  
 545 8B). The LFP waveforms generated were close to symmetrical (mean asymmetry index =  $0.25 \pm 0.11$ ; see  
 546 Figure S24). Over a range of ACh concentrations and tonic depolarization levels, this theta rhythm was  
 547 robust, narrow-band (Figure 8BC), and was generated by a highly regular current source restricted to  
 548 stratum pyramidale (Figure 8E). Higher ACh concentrations, while slightly reducing theta-band power,  
 549 reduced the level of beta-band activity (Figure 8C). Increased levels of tonic depolarization enhanced  
 550 theta harmonics and higher frequency components (Figure 8CD). Theta-band power was more dependent  
 551 on the amplitude of the disinhibitory oscillation than either ACh concentration or tonic depolarization  
 552 level (Figure 8F).

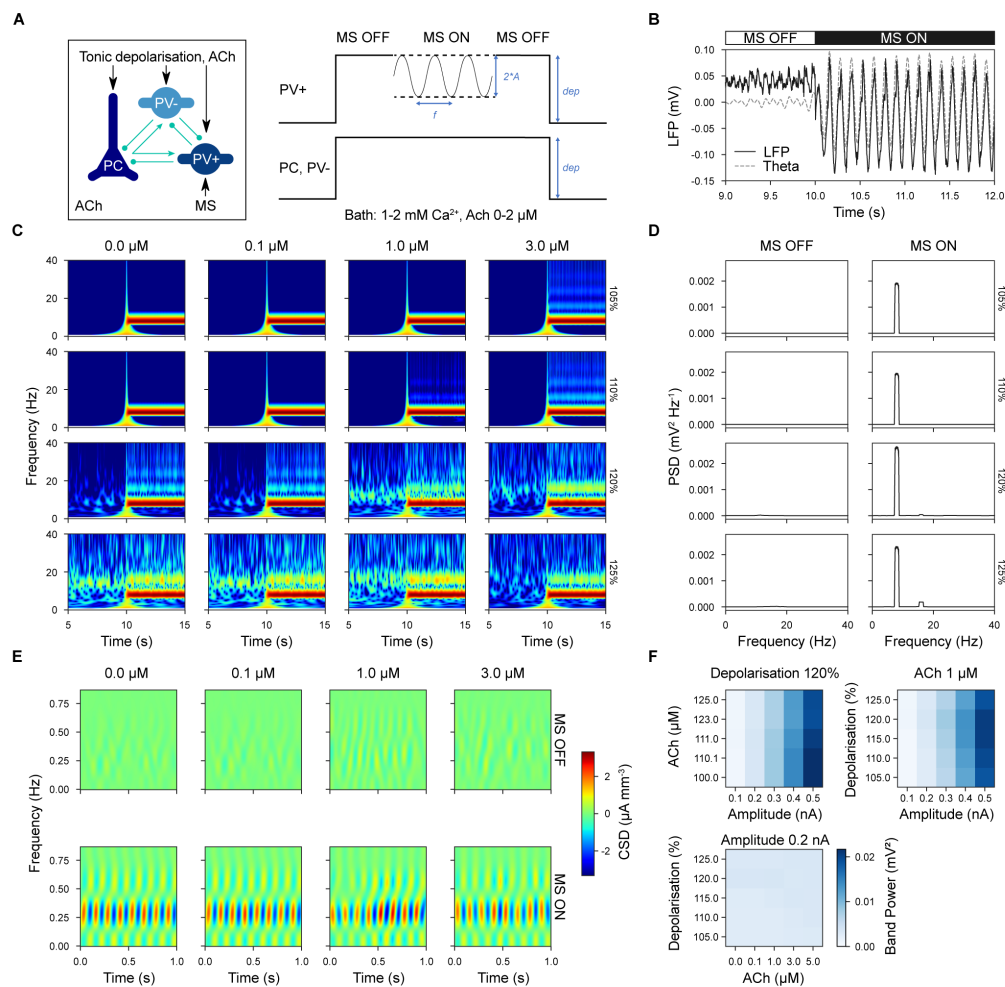

Figure 8: Medial septum (MS) disinhibition of parvalbumin-positive (PV+) interneurons induced theta oscillations in CA1. (for legend, see next page)

---

Figure 8 (*previous page*): A. In this setup, all neurons received a tonic depolarizing current as a percentage of each neuron's rheobase current only ("MS OFF" condition) and later, for a given period an oscillatory hyperpolarizing current was injected into PV+ interneurons only ("MS ON" condition) in the presence of ACh. B. Before onset of disinhibition ("MS OFF"), CA1 showed weak, irregular beta-band activity but changed to strong, regular theta-band activity after onset of disinhibition ("MS ON"). C. Morlet complex wavelet spectrogram shows how efficiently disinhibition induces theta oscillations throughout the oscillatory period and for range of ACh concentrations and tonic depolarisation levels following onset of disinhibition. D. Power spectral density (PSD), across different levels of tonic depolarization, exhibits an absence of any strong theta response without disinhibition, but narrow-band 8 Hz with disinhibition. E. Current source density (CSD) analysis shows lack of a strong oscillation across layers before the oscillatory disinhibitory stimulus (top) but a strong source-sink alternation in stratum pyramidale (~0.3 mm depth) during the stimulus (bottom). F. Theta band power was more dependent on the amplitude of oscillatory hyperpolarizing current than ACh concentration or level of tonic depolarization.

553 During theta rhythm, morphological cell type responses separated into one of two main groups that were  
554 in anti-phase with each other (see Figure 9). As the level of tonic depolarization increased, more phase  
555 locked cells were detected (Figure 9A) and only above 110% depolarization (where 100% represents  
556 the depolarization necessary to reach spike threshold) were there enough interneurons, that were active  
557 enough to discern this dual grouping. Increasing ACh concentration tended to weaken pyramidal phase  
558 locking (Figure 9A). For example, at 120% depolarisation and 1  $\mu$ M ACh, the firing of pyramidal, ivy,  
559 and CCK+ basket cells was broadly tuned around the theta trough and rising phase, while the firing of  
560 axoaxonic, bistratified and PV+ basket neuron was more narrowly tuned around the peak of the theta  
561 rhythm (Figure 9B left). Neurons with significant phase locking matched this pattern but were even  
562 more narrowly tuned (Figure 9B middle). The phase locking of axoaxonic, ivy and pyramidal cells closely  
563 matched *in vivo* recordings (see Table S22) (Fuentealba et al., 2008; Klausberger, 2005; Klausberger  
564 et al., 2003, 2004) but bistratified and basket cells (CCK+ and PV+) were by comparison more than  
565 90 degrees out of phase (Figure 9B right).



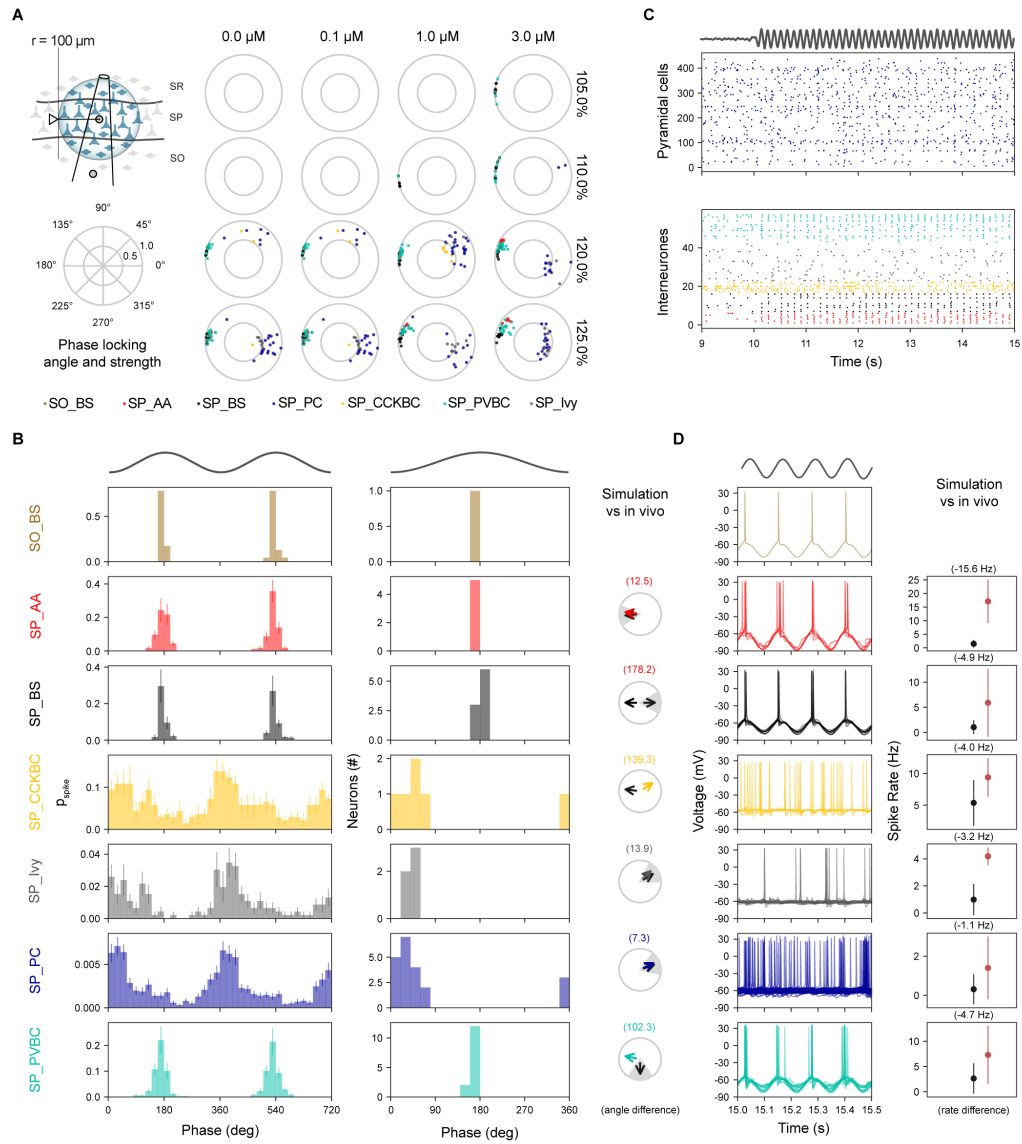

Figure 9: Medial septum (MS) disinhibition induced anti-phase modulation of CA1 neurons during theta cycles. (for legend, see next page)

Figure 9 (*previous page*): A. Phase locking angle and strength for range of ACh concentration (columns) and levels of tonic depolarization (where 100% represents the spike threshold, rows) for modulation amplitude ( $A=0.2$  nA) divides cell types into two groups (SP\_PC grouped with SP\_Ivy and SP\_CCKBC, while SP\_PVBC grouped with SO\_BS, SP\_AA, and SP\_BS) once enough phase-locked interneurons of each type are included. Neurons for analysis were selected within 100  $\mu$ m radius of the stratum pyramidale electrode location. B. Phase Modulation. Left: Spike discharge probability of all neurons grouped by morphological type shows PV+ neurons (SO\_BS, SP\_AA, SP\_PVBC, and SP\_BS) are closely tuned to peak of LFP theta-band (top trace) while pyramidal cells and PV- interneurons (SP\_CCKBC and SP\_Ivy) are more broadly tuned around theta trough ( $0^\circ$ ). Middle: Phase locking for each morphological class over a single theta cycle is tighter than reported experimentally especially PV+ interneurons. Right: Experimental validation of phase locking shows some cell types closely match *in vivo* recordings (SP\_AA, SP\_Ivy and SP\_PC) while others are more than a quarter-cycle out of phase (SP\_BS, SP\_CCKBC and SP\_PVBC). C. Spiking raster plots over longer period show weaker phase modulation in pyramidal cell spiking (top panel) than in LFP theta rhythm (trace above plot). PV+ interneurons are tightly modulated, however, while PV- interneurons are more weakly modulated (bottom panel). D. Intracellular traces of morphological cell types. Left: PV+ interneurons tightly spike on release from disinhibition whereas PV- interneurons do not. Right: comparing firing rates, all neuronal types in the model are less active than *in vivo* during theta rhythms with SP\_Ivy and especially SP\_AA types outside empirical range.

566 At first sight, the pattern of pyramidal firing appears to be more weakly modulated by theta but  
567 pyramidal cells failed to spike on every theta cycle (Figure 9C top). In contrast, whereas axoaxonic,  
568 bistratified, and PV+ basket cells spiked tightly for most cycles, ivy cells spiked more rarely and CCK+  
569 basket cells more tonically (Figure 9C bottom). Intracellular voltage traces for axoaxonic, bistratified,  
570 and PV+ basket cells showed they spiked tightly on the rebound from the release of the hyperpolarizing  
571 stimulus, whereas pyramidal and other interneurons lacking this were less reactive to theta (Figure  
572 9D left). However, all neurons spiked at a lower average rate than *in vivo* recordings (Fuentelba  
573 et al., 2008; Klausberger, 2005; Klausberger et al., 2003, 2004) with pyramidal cells around 1 Hz  
574 lower and, at the extreme, axoaxonic cells almost 16 Hz lower (Figure 9D right, stimulus: modulation  
575 amplitude 0.2 nA, 120% depolarization and 1  $\mu$ M ACh). The population synchrony of pyramidal cells  
576 with theta trough ("theta-") was consistent with *in vivo* data (Csicsvari et al., 1998) for a range of  
577 disinhibitory stimulus amplitudes whereas for fast-spiking interneurons like axoaxonic and PV+ basket  
578 cells, synchronization with theta peak ("theta+") only occurred with lower stimulus amplitudes (Figure  
579 S25). Overall, the network response to an extrinsic, inhibitory, oscillatory stimulus matched many though  
580 not all experimental validations of *in vivo* theta oscillations in CA1.

581 Taken together, the simulations showed the interplay between extracellular calcium concentration, tonic  
582 depolarization, ACh, and MS disinhibition. ACh and depolarization cooperate to increase excitability.  
583 Similarly, both ACh and low extracellular calcium concentration tend to decouple the neuron activity. The  
584 latter prevents the higher-frequency oscillation that otherwise results from the depolarization. Instead,  
585 it generates sparse activity necessary to entrain the network to the rhythm imposed by MS disinhibition.



586 In summary, we investigated five possible mechanisms for theta oscillations compatible with a variety  
587 of experimental setups: (i) spontaneous synaptic release, (ii) random afferent synaptic barrage, (iii)  
588 bath manipulation of calcium and potassium, (iv) excitatory oscillatory input via Schaffer collaterals,  
589 and (v) oscillatory disinhibition via medial septum GABAergic projections. Spontaneous synaptic release  
590 and random afferent synaptic barrage did not induce detectable theta oscillations in the model. Tonic  
591 depolarization at certain strengths induced a variable and unstable theta oscillation at 10-12 Hz. More  
592 stable and stronger theta oscillations followed extrinsic drivers. Importantly, while the model showed  
593 that both inputs trigger theta, the underlying mechanisms were different, and effect of MS disinhibition  
594 was more compatible with *in vivo* data. The presence of multiple mechanisms could explain, at least in  
595 part, the heterogeneity of the experimental data.

### 596 **2.2.2 Propagation of oscillatory inputs**

597 As illustrated above, an oscillatory input through SC can reliably produce an oscillation of the same  
598 frequency in CA1 (see section on Theta oscillations). To test whether other input frequencies (i.e., 0.5-  
599 200 Hz) applied via SC afferents also reliably entrained oscillations of the same frequency in CA1, we  
600 simulated an oscillatory input from CA3, with four different signal strengths (i.e., changing the average  
601 firing rate of CA3 PC: 0.1 Hz, 0.2 Hz, 0.4 Hz, and 0.8 Hz) and measured the activity of CA1 (Figure  
602 10A).

603 The I-O gain, minimally defined as the ratio between the overall number of output spikes divided by the  
604 number of input spikes, is not constant, but it depends both on the mean firing rate of CA3 PCs and  
605 on the oscillatory frequency of the input (Figure 10B). For each CA3 mean firing rate, the number of  
606 output neurons is maximized at different frequencies. Notably, the I-O responses of PC and interneurons  
607 are radically different (Figure 10B). Overall, the highest CA1 output was obtained with a 0.4 Hz mean  
608 CA3 frequency. For this reason, we considered this condition for further analysis.

609 I-O responses of CA1 displayed band-pass filtering characteristics. Focusing on spike train correlations  
610 (examples of spike trains in Figure 10C), CA1 activity is generally well correlated with the input from  
611 CA3 for delta to low gamma input frequencies (i.e., between 1 and 30 Hz), while for lower and higher  
612 frequencies the correlation decreases. A similar pass-band filtering behavior can be seen in the internal  
613 CA1-CA1 spike time tiling coefficient (STTC). In this case the pass-band bandwidth is larger, extending  
614 to the gamma band (Figure 10D). The spike-spike correlation histograms confirm the propagation  
615 of oscillations from CA3 to CA1 for delta to gamma waves (Figure 10E). All spike train correlation  
616 measurements have been repeated using standard covariance and cross-correlation functions, and they  
617 confirmed the results obtained with the STTC analysis (not shown).

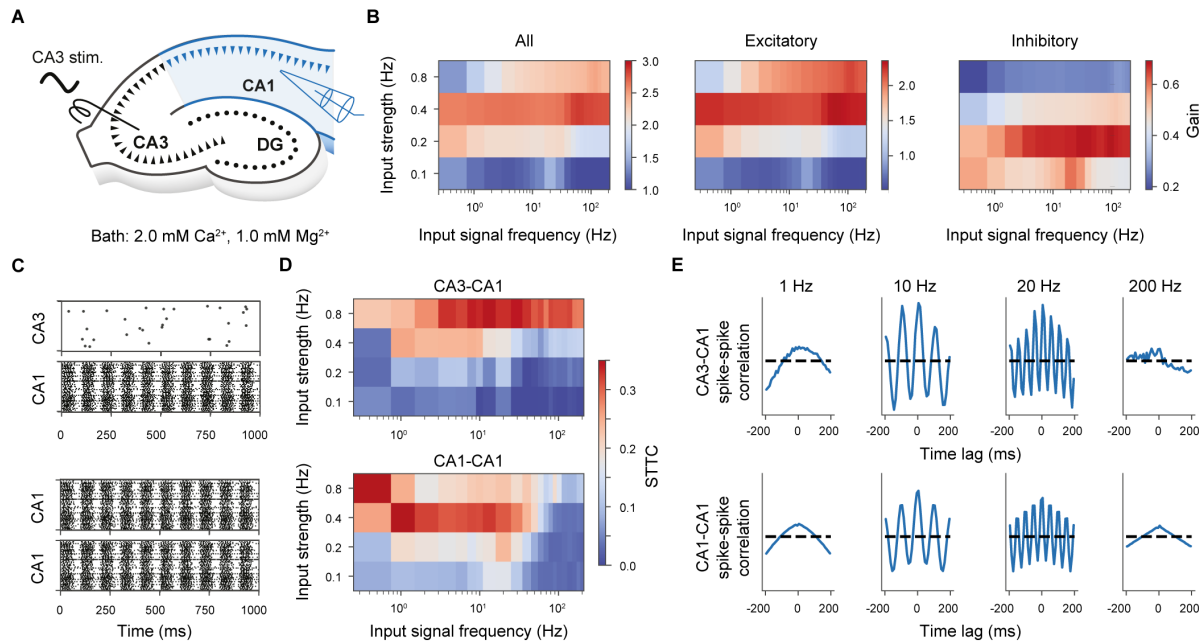

**Figure 10: I-O transformation.** A. The illustration shows the *in silico* experimental setup used to study the propagation of CA3 oscillations in CA1. B. Ratio between the number of CA1 (output) and CA3 (input) spikes as a function of the input oscillation frequency (abscissae) for four levels of input mean firing rate (ordinatey-axis). Considering all CA1 neurons (left) or uniquely CA1 PCs (center) and CA1 interneurons (right). C. Examples of CA3 and CA1 spike train (in this case for 0.4 Hz mean CA3 firing rate and oscillation frequency of 10 Hz). 100 random CA3 neurons and CA1 neurons are selected and shown. The same neurons are used to compute the 10,000 pairs of STTC and spike-spike correlations (panels D-E), in one case crossing CA3 and CA1, in the other case within CA1 neurons. D. Heatmaps representing the computed STTC values (bins = 10 ms) for each combination of input oscillation (abscissae) and mean CA3 frequency (ordinate), for CA3-CA1 and CA1-CA1 neurons, respectively. E. Spike-spike normalized correlation histograms (bins = 10 ms, 1 s of simulated activity) in four example cases: 1 Hz, 10 Hz, 20 Hz, and 200 Hz (with a mean CA3 firing rate of 0.4 Hz), for CA3-CA1 and CA1-CA1 neurons, respectively.

618 To determine whether particular experimental conditions might have an impact on the result, we specif-  
 619 ically selected a study examining gamma-band oscillations *in vitro* (Zemankovics et al., 2013). We  
 620 analyzed the local field potential in the CA1 network model while it was driven by SC input modulated  
 621 at gamma frequency. The properties of this external drive and simulation conditions were exactly tailored  
 622 to these *in vitro* experiments (e.g. 300  $\mu\text{m}$ -thick slices, 2 mM extracellular  $\text{Ca}^{2+}$ , 2 mM extracellular  
 623  $\text{Mg}^{2+}$ , 10  $\mu\text{M}$  ACh). As the present circuit does not model the topography of SC connections to CA1  
 624 neurons, it does not constrain how many active SCs project to the simulated slice. Therefore, we ran  
 625 multiple simulations varying the number of activated SCs, from none to all. We observed that gamma  
 626 oscillatory SC input could entrain the entire CA1 network of the model slice to oscillate at the driving  
 627 frequency (31 Hz) (Figure S26A). In the experiment of Zemankovics et al. (2013), the authors added  
 628 carbachol (CCh) to generate oscillations in CA3, which were transmitted to CA1 via SC, but it is not  
 629 clear whether CCh also has a significant effect on CA1 at the concentration used in the experiment. To  
 630 quantify the effect of CCh, we reran the simulation without CCh. SC inputs, ranging from 15,000 to

631 100,000, were able to induce strong gamma oscillation in the absence of CCh. However, CCh increased  
632 the number of inputs needed for stable gamma oscillation, probably due to its weakening effect on  
633 synapses (Figure S26B).

634 Oscillations at several frequencies can be induced in CA3 and reliably transmitted to CA1 *in vitro*  
635 (Bianchi & Wong, 1994; Fellous & Sejnowski, 2000; Fisahn et al., 1998; J. H. Williams & Kauer,  
636 1997). Sasaki et al. (2006) also showed that the CA1 network responded more reliably in the near-  
637 gamma frequency (20-40 Hz) range, acting like a band-pass filter. Other frequencies (e.g., ripples) are  
638 generated locally in CA1 and are not driven by CA3 activity (Buzsáki, 2015). Our model confirmed  
639 the CA1 network could be entrained into an oscillatory behavior at various frequencies, by CA3 inputs.  
640 However, input frequencies that are either too low ( $< 1$  Hz) or too high ( $> 100$  Hz) input frequencies  
641 fail to propagate. This implies that intermediate frequencies can be used efficiently to synchronize CA1  
642 with other brain regions or to carry information to CA1. The I-O relationship in different conditions  
643 changes non-linearly as a function of both the input oscillatory frequency and its strength. Finally, our  
644 results show that CCh does not significantly influence the propagation of gamma oscillation from CA3  
645 to CA1 and suggest that the main effect of CCh is the generation of gamma oscillation in CA3.

## 646 **3 Discussion**

### 647 **3.1 Main summary**

648 This study presents the reconstruction and simulation of a full-scale atlas-based model of the rat hip-  
649 pocampal CA1 region driven by community data and collaboration. We extended and improved the  
650 framework of Markram et al. (2015) to curate and integrate a wide variety of anatomical and phys-  
651 iological experimental data from synaptic to network levels. We then systematically applied multiple  
652 validations for each level of the model. We augmented the resulting highly detailed intrinsic CA1 circuit  
653 with a reconstruction of its main input from CA3 and a phenomenological model of neuromodulation by  
654 acetylcholine. Importantly, the circuit model is general and not created to reproduce a narrow spectrum  
655 of use cases but to be capable of addressing a wide range of research questions. To demonstrate its  
656 general utility, we were able to simulate different scales of circuits and investigate the generation and  
657 transmission of neuronal oscillations, with particular emphasis on theta rhythm, for a variety of stimulus  
658 conditions.

### 659 **3.2 Previous work and limitations**

660 For more than three decades, there has been a progression in both the size and level of detail of  
661 large-scale multiscale models of the rat hippocampus (for a comparison of their key features with the  
662 present model, see Table S2). These biologically realistic models aim to explain the complex dynamics  
663 of hippocampal activity, in particular the generation and control of rhythmic responses. However, none  
664 of these models, including the one reported here, provides a complete description of a hippocampal  
665 region or regions. Moreover, the results of these models are difficult to compare because of fundamental  
666 differences in their composition, organization, and underlying assumptions.

667 The current model stands out as the only model that realistically constrains the neurons and their  
668 connectivity by the highly curved shape of CA1 rather than by an artificial space and that reflects  
669 short-term plasticity and spontaneous synaptic release, both well-established characteristics of central  
670 nervous system synapses. In addition, the morphologies and electrical properties of model neurons here  
671 are not just copies of the same class exemplars but their properties have been systematically varied  
672 to better capture the diverse nature of neuronal circuits and their responses to stimulation. However,  
673 compared with Bezaire et al. (2016), some elements are still missing from the current model such as  
674 neurogliaform cells, which did not exist in our available dataset, and GABA<sub>B</sub>R which are not included  
675 in our simulations.

676 Nonetheless, the current model includes the perforant path-associated (PPA) and trilaminar interneu-  
677 rons, which were absent from all previous models. In addition, we modeled the NMDA synaptic currents  
678 observed in both hippocampal pyramidal cells and interneurons (with specific NMDAR conductance,  
679 rise and decay time constants for each pathway) that are absent in the model of Bezaire et al. (2016).  
680 Furthermore, the connectivity algorithm used for the current model generates an intrinsic connectome  
681 with more realistic high-order statistics than the more prescriptive approach used in the Bezaire et al.  
682 (2016) model (Giacopelli et al., 2021). Unlike Yu et al. (2020), we did not replicate the topography  
683 of the afferent projections, which may play a role in patterning the circuit response, but did model the  
684 projections and circuit at a full rather than reduced scale. Overall, further improvement to our model

685 requires additional experimental data.

686 While we incorporated key features distributed among previous models into a single, general model (see  
687 Table S2), it is important to recognise that our aims and approach were different, representing a step  
688 change in hippocampal modeling. The intention of the framework was first to curate and integrate  
689 community data into the model, preserving provenance for reproducibility, in a way that would allow  
690 the addition of new datasets from the large hippocampal community. Re-using these datasets and  
691 then making them publicly available through hippocampushub.eu supports the 3R principles (replace,  
692 reduce, refine) for the reduction of animal experiments. Each circuit component and the final model  
693 was then systematically validated in an open and transparent way to a degree not previously attempted.  
694 To increase the realism and utility of simulation experiments, we sought to approximate experimental  
695 conditions (e.g. slice thickness and location, bath calcium, magnesium and acetylcholine concentrations,  
696 and recording temperature) and to increase the capability to manipulate and record from the model  
697 (e.g. spontaneous synaptic release, alter connectivity, extracellular LFP recording, and apply a variety  
698 of stimuli). In short, the aim was to offer a more realistic yet scalable and sustainable approach to  
699 model brain regions at full scale.

### 700 **3.3 Future directions**

701 There are some clear directions that would improve a full-scale atlas-based model of rat CA1. First,  
702 large-scale models should include other feedforward synaptic pathways such as from CA2 (Tao et al.,  
703 2021) and entorhinal cortex (EC) (Amaral & Witter, 1989), and back-propagating pathways such as from  
704 subiculum (Jackson et al., 2014). Second, to date none of the large-scale models cover all the cell classes  
705 found in the hippocampus (e.g. see Pelkey et al., 2017). For instance, interneuron-specific interneurons  
706 (ISIs), estimated to represent about 20% of CA1 interneurons (see Bezaire and Soltesz, 2013), and their  
707 disinhibitory influence have to date been absent in all large-scale circuit models. Third, improvements are  
708 needed to represent *in vivo* conditions associated with different brain states more accurately to facilitate  
709 easier comparisons with corresponding empirical data such as theta-phase preference of morphological  
710 cell types (e.g. Klausberger et al., 2003). Fourth, while Yu et al. (2020) introduced topographic  
711 connectivity for EC-DG-CA3 projections based on a 2D flat map, topographic projections such as from  
712 CA3 to CA1 are best described in 3D space (e.g. Ishizuka et al., 1990) and they can be more accurately  
713 represented in atlas-based circuits. Fifth, a variety of structural and functional gradients in hippocampus  
714 have not been adequately modeled, e.g. differences in connectivity and responses along the dorsoventral  
715 axis of CA1 (Lyttle et al., 2013; Malik et al., 2016a; Papatheodoropoulos, 2015), which may be important  
716 in behavior. Again, atlas-based circuits are better suited for this task where dorsal and ventral regions  
717 are predefined. Beyond this, other afferent inputs (e.g. perforant pathway) and circuit properties such  
718 as gap junctions (e.g. Amsalem et al., 2016; Mercer, 2012; Mercer et al., 2006) and long-term synaptic  
719 plasticity (e.g. Chindemi et al., 2022) could be incorporated.

720 In general, anchoring a circuit model in the volumetric space of a brain region atlas makes mapping  
721 experimental data for data integration, validation and prediction easier than for more abstract spaces.  
722 The Allen Brain Atlas has, for instance, demonstrated the advantages of registering community ex-  
723 perimental data in a common reference atlas (Wang et al., 2020) and a common framework appears  
724 advantageous for modeling as well. The piecemeal approach of constructing circuits for a specific use

725 case has short-term advantages for practicality but in the long run, a community reference circuit model,  
726 that also has flexibility for customization and embodies reproducibility, makes comparing results easier  
727 and offers a longer-term gain for investing in the modeling of any brain region.

### 728 **3.4 Lessons learned**

729 In the context of a community effort, the process of curating and integrating available data to reconstruct  
730 a brain region and replicating the experimental conditions *in silico* proved instructive in a number of  
731 ways.

732 Assembling the components to reconstruct a brain region naturally reveals gaps in the available data and  
733 knowledge. Notably, for instance, while Schaffer collateral input to CA1 has received many decades of  
734 attention, especially in terms of long-term plasticity, we found the basic information needed to model this  
735 pathway quantitatively, was limited. To address this gap, we devised a multi-step algorithm constrained  
736 by the data that were available to parametrize these connections. The process of assembling the  
737 components can also reveal whether our inferences and assumptions are weak or can hold. For example,  
738 we initially assumed that connectivity algorithm parameters derived for cortex (Markram et al., 2015)  
739 could be re-used in hippocampus. However, this overestimated E→E and underestimated E→I synaptic  
740 connections. We revised our assumption for these parameter values.

741 While an open source rat hippocampal atlas (Ropireddy et al., 2012) was crucial to reconstruct CA1, the  
742 original volumetric reconstruction was too noisy for our purposes and required additional processing to  
743 give smooth layering. This smoothness was necessary to place and orient morphologies accurately in the  
744 atlas in relation to the layers. If the morphology was incorrectly placed or oriented, this had a knock-on  
745 effect for how the circuit was connected. Similarly, the completeness of morphological reconstructions  
746 also affected connectivity. For these reasons, some cell types in our available dataset could not be used  
747 in the circuit model, sacrificing a small amount of cell type diversity in favor of completeness.

748 Setting up simulations to reproduce the desired experimental conditions requires careful attention. We  
749 offer two examples from our research. First, when reproducing the I-O gain of SC afferent input  
750 reported in Sasaki et al. (2006), we initially sampled all neurons in the model slice to plot to the I-O  
751 curve. However, the result was poor. We later resolved this by following their experimental sampling of  
752 a subset of neurons with which we could closely match the empirical curve. Second, when reproducing  
753 MS-induced theta oscillations, we initially simulated under default conditions of extracellular calcium  
754 concentration at 2 mM, resulting in theta oscillations that occurred episodically and only for a restricted  
755 parameter regime. However, when we lowered the extracellular calcium to *in vivo* levels (1 mM), sparser  
756 activity led to more robust and stable theta oscillations.

757 Computational methods and simulations allow the integration of sparse experimental results and provide  
758 a framework to interpret them. For instance, the effects of ACh release on network activity have not been  
759 fully elucidated yet, and it is not clear whether cholinergic agonism evokes oscillations in the CA1 region  
760 (Bianchi & Wong, 1994; Fellous & Sejnowski, 2000; Fisahn et al., 1998; Pietersen et al., 2014; J. H.  
761 Williams & Kauer, 1997). Our model predicts that a progressive increase in ACh concentration induces  
762 a shift in network activity, which becomes initially highly correlated and then highly desynchronized at

763 high concentrations. Moreover, various mechanisms have been proposed for the generation of theta  
764 oscillations in CA1 (Colgin, 2013). Using our general model, while multiple mechanisms can potentially  
765 trigger theta oscillations in CA1, we observed that the neuronal dynamics induced by different extrinsic  
766 pacemakers were distinct. Only the medial septal disinhibition of PV+ interneurons was able to induce  
767 a theta rhythm compatible with observed *in vivo* firing phases of interneurons.

### 768 **3.5 A community-driven modeling approach**

769 The model was built and simulations run through the cooperation of several laboratories each with  
770 different expertise. Since we could not access a standardized core set of data made for the purpose of  
771 modeling as done previously (Iavarone et al., 2023; Markram et al., 2015; Reimann et al., 2022), instead,  
772 data had to be curated and integrated from different sources from labs following different protocols.  
773 The majority of single neuron morphologies and recordings, for instance, came from University College  
774 London (UCL) (Ali et al., 1998; Ali & Thomson, 2008; Ali et al., 1999; Fuentealba et al., 2008; Hughes  
775 et al., 2000; Mercer et al., 2006; Pawelzik et al., 1999, 2002; Thomson et al., 2000). From these data,  
776 single neuron models were created between the Blue Brain Project (BBP) and Italian National Research  
777 Council (CNR) (R. Migliore et al., 2018) and these were then validated by a computational lab at  
778 Institute of Experimental Medicine, Budapest (KOKI) (Sáray et al., 2021). Similarly, physiological data  
779 from paired recordings that characterized individual synaptic pathways were provided by an experimental  
780 lab in KOKI and then curated and integrated together with BBP (Ecker et al., 2020). Subsequently,  
781 BBP used these single neuron and synapse models to build and share the circuit model so computational  
782 labs at BBP, CNR, and KOKI could simulate various hippocampal use cases, only some of which have  
783 been presented here. Combining the framework of Markram et al. (2015) with community data and  
784 collaboration resulted in the generalization and improvement of data curation and integration methods  
785 for more varied data, improvements in tools like BluePyOpt for optimizing neurons, and the development  
786 of a new tools such as HippoUnit to systematically validate and compare different single neuron models.

787 This approach offers important features that make an attractive case for adoption by the wider hip-  
788 pocampus community. The model components, validations, and circuit are openly available through a  
789 dedicated portal [hippocampuspush.eu](http://hippocampuspush.eu) to maximize transparency and to allow the community to examine  
790 and judge how the circuit model was built, validated, simulated and analyzed. This includes providing  
791 metadata and provenance to improve reproducibility. Consequently, the framework and tools are well  
792 positioned to incorporate new data from the wider community to help improve the model in an open,  
793 transparent and reproducible way. Finally, this circuit model can be extended to incorporate glia and  
794 vascular systems within the same framework (Zisis et al., 2021). These systems are fundamental to  
795 regulating neuronal activity and communication in health and disease (Giaume et al., 2010) and could  
796 be adapted to make atlas-based circuit models much more realistic embodiment of brain regions. To  
797 conclude, this breakthrough, community-driven approach has potential to enhance understanding of  
798 hippocampal function and contribute significantly to advancing neuroscience research.



## 799 **4 Methods**

### 800 **4.1 Reconstruction**

801 We followed and adapted the method described in Markram et al. (2015) and Reimann et al. (2022)  
802 to reconstruct a full-scale model of the rat hippocampus CA1 (Figure 1). In brief, we collected 3D  
803 morphological reconstructions, belonging to different morphological types. Initial reconstructions were  
804 curated to produce a library of morphologies. The library was mixed and matched with the initial set  
805 of single-cell models (Ecker et al., 2020; R. Migliore et al., 2018) to produce a library of Hodgkin-  
806 Huxley multicompartimental neuron models. We placed neuron models into the CA1 region volume  
807 (Ropireddy et al., 2012) according to available data on cell densities and composition. We derived the  
808 intrinsic connectivity following the method of Reimann et al. (2015), and assigned synaptic parameters  
809 as described in Ecker et al. (2020).

### 810 **4.2 Schaffer collaterals**

811 Schaffer collaterals were generated according to anatomical information and then functionalized lever-  
812 aging previous work (Ecker et al., 2020; Markram et al., 2015). The number of fibers was constrained  
813 considering the ratio between CA3 PCs and CA1 PCs and then connected with target in-degree ratios on  
814 CA1 PCs and INTs. Finally, synaptic physiology parameters were drawn from distributions with means  
815 and standard deviations specifically optimized for SC→PC and SC→INT projections.

### 816 **4.3 Cholinergic modulation**

817 To model the effect of ACh release, we expand the initial work of Ramaswamy et al. (2018). We collected  
818 data on the effect of ACh on neurons and synapses. In the case of neurons, we sampled 100 instances for  
819 each m-type and computed how an amount of somatic current deflects the voltage (sub-threshold) or  
820 increases the firing rate (supra-threshold). We then modeled the effect of ACh concentration on somatic  
821 voltage and firing rate with a current that produced the same effect. For synapses, we sampled 1,000  
822 random connections, and computed how a change in the parameter  $U_{SE}$  led to a change in somatic  
823 PSP. Next we incorporated the data on the effect of ACh concentration on PSP with a change in  $U_{SE}$ .

### 824 **4.4 Model availability**

825 The circuit and simulation output are in SONATA format (Dai et al., 2020). The entire model, its  
826 components, and the source data can be explored and downloaded from hippocampushub.eu.

### 827 **4.5 Simulation**

828 Unless it is otherwise specified, we ran simulations with the following default parameters: extracel-  
829 lular calcium concentration of 2 mM, extracellular magnesium concentration of 1 mM, acetylcholine  
830 concentration of 0  $\mu$ M, spontaneous synaptic events (minis) absent, Schaffer collaterals disconnected,  
831 temperature of 34.0°C, action potential detected at axon initial segment (AIS), voltage initiated at -65  
832 mV, time step of 0.025 ms, CoreNEURON as simulator. Default simulations were run over cylindrical  
833 microcircuits and stored the spike times of each neuron and somatic voltages with a time step of 0.025  
834 ms. Analyses of the simulations normally excluded the first 1000 ms to remove an initial circuit transient.



## 835 **4.6 Local field potential**

836 The extracellular field potential in the simulations was estimated using EMSim (see Table 1) (Newton  
837 et al., 2021; Reimann et al., 2013). The transmembrane currents from all the neuronal compartments,  
838 necessary to estimate the extracellular signal, were acquired with a temporal resolution of 0.5 ms.  
839 The local field potential (LFP) signal was generated by the low-pass filtering of this extracellular field  
840 potential (< 400 Hz cutoff) and its spectral characteristics were then analyzed using the Elephant  
841 package (Denker et al., 2018). For more details, see supplementary section S1.22.1.

## 842 **4.7 Statistical analysis**

843 Unless otherwise stated, values are expressed as mean  $\pm$  standard deviation. We generally perform  
844 correlation tests to compare model and experiment data, and results are reported as (Pearson correlation  
845 coefficient, p-value). When correlation test is not applicable, depending on the data availability, we  
846 perform a z-test, t-test or even a qualitative comparison between model and experimental data (see  
847 S1.24).

## 848 **4.8 Visualization**

849 Hippocampus circuit and simulations were visualized with Brayns software, while morphologies were  
850 visualized with NeuroMorphoVis (Abdellah et al., 2018) (see Table 1).

## 851 **4.9 Available hardware**

852 Simulations were run initially using Blue Brain IV (BB4) system and later Blue Brain 5 (BB5) system,  
853 hosted at the Swiss National Computing Center (CSCS) in Lugano, Switzerland. BB4 was based on  
854 IBM BlueGene/Q (Haring 2012) with 4,096 nodes consisting of 65,536 PowerPC A2 cores. BB5 is an  
855 HPE SGI 8600 (Hewlett Packard Enterprise 2019) platform with 200 Intel Skylake with 7,200 cores and  
856 later 880 Intel Cascade Lake nodes with 35,200 cores.

857 In Table S24, we list HPC resources required to run and analyze exemplar simulations in this paper.  
858 We note the major bottlenecks in simulating the circuit with individual columns such as the circuit  
859 size, presence of SC, type of recording (intracellular or LFP) and report on the amount of memory  
860 required to load and simulate the circuit as well as how much time it takes to run them. We observed  
861 that the amount of required resources varied between 3.7 GB - 1.56 TB (422x) depending on these  
862 parameters and the computation time diverged around 4.08x between NEURON and CoreNEURON  
863 simulators (Kumbhar et al., 2019).

## 864 **4.10 Supplementary information**

865 Supplemental information includes Supplemental methods, figures, and tables.

## 866 **5 Funding**

867 This study was supported by funding to the Blue Brain Project, a research center of the École Poly-  
868 technique Fédérale de Lausanne (EPFL), from the Swiss government's ETH Board of the Swiss Federal

869 Institutes of Technology.

870 Funding was also provided by The Human Brain Project through the European Union Seventh Framework  
871 Program (FP7/2007-2013) under grant agreement no. 604102 (HBP) and from the European Union's  
872 Horizon 2020 Framework Programme for Research and Innovation under the Specific Grant Agreements  
873 No. 720270 (Human Brain Project SGA1) and No. 785907 (Human Brain Project SGA2). M.M. also  
874 acknowledges funding for this work from the EU Grant Agreement No. 945539 (Human Brain Project  
875 SGA3), the Flag ERA JTC 2019 (MILEDI Project), the Fenix computing and storage resources under  
876 the Specific Grant Agreement No. 800858 (Human Brain Project ICEI), and a grant from the Swiss  
877 National Supercomputing Centre (CSCS) under project ID ich002 and ich011. S.K. and S.S. were  
878 supported by the the European Union project RRF-2.3.1-21-2022-00004 within the framework of the  
879 Hungarian Artificial Intelligence National Laboratory. The Wellcome Trust, Medical Research Council  
880 (UK), Novartis Pharma and the Human Brain Project funded J.F., S.L., A.M., A.M.T.

## 881 **6 Acknowledgments**

### 882 **6.1 Author contributions**

883 H.M. conceived and led the study. S.K., M.M., A.T., F.S., E.M., and A.M. co-led the study. A.M.T. and  
884 A.M. planned, performed and supervised electrophysiological experiments and neuron reconstructions.  
885 J.F. and S.L. performed reconstructions. A.R., J.B., A.A., D.B., K.K. planned and supervised on data  
886 integration, strategies and algorithms, model building, simulation experiments, and analysis. A.A., J.B.,  
887 D.B., A.R. reconstructed Schaffer collaterals. A.A., C.C., J.B., A.R. modeled Acetylcholine. J.B. and  
888 A.R. worked on theta. A.A., J.B. and A.R. worked on oscillation propagation. F.S. and J-D.C. planned  
889 and supervised the development of algorithms, software and workflows, computing infrastructure, and  
890 technical integration. A.R., J.B., A.A., D.B., C.C., K.K. wrote the manuscript. A detailed listing of  
891 author contributions is available in the Supplemental materials.

### 892 **6.2 Acknowledgments**

893 The authors would like to thank all the people involved in the rat CA1 hippocampus project over the last  
894 years, in particular Attila Gulyás, Luc Guyot, and Arseny Povolotsky. We would also like to thank those  
895 who offered valuable advice or data: Giorgio Ascoli, Norbert Hájos, Jesse Jackson, Corette Wierenga,  
896 Sylvain Williams. Experimentalists who generated data for this project or who recorded, dye-filled and/or  
897 reconstructed neurons: A.B. Ali, A.P Bannister, R. Begum, N. Botcher, J. Deuchars, K. Eastlake, D.  
898 I. Hughes, M. Ilia, J. Kerkhoff, S. Kirchhecker, H. Pawelzik, and H. Trigg. D.C. West designed data  
899 collection and analysis software. We thank those who worked on the Explore feature of the Hippocampus  
900 hub: Anil Tuncel, Pavlo Getta, Caitlin Monney, Stefano Antonel, Alexander Dietz, and Liviu Soltuzu.  
901 Finally, we are indebted to Karin Holm for copy editing and publication advice and support.

## 902 **7 Software used**

903 Table 1 gives a list of software used in the paper.

| Software Name        | Source                            | Identifier                                                                                                        |
|----------------------|-----------------------------------|-------------------------------------------------------------------------------------------------------------------|
| bbp-workflow         | BBP/EPFL software package         | not yet open source                                                                                               |
| BluePy               | BBP/EPFL software package         | not yet open source                                                                                               |
| BluePyEfe            | BBP/EPFL software package         | <a href="https://github.com/BlueBrain/BluePyEfe">https://github.com/BlueBrain/BluePyEfe</a>                       |
| BluePyOpt            | BBP/EPFL software package         | <a href="https://github.com/BlueBrain/BluePyOpt">https://github.com/BlueBrain/BluePyOpt</a>                       |
| BluePyMM             | BBP/EPFL software package         | <a href="https://github.com/BlueBrain/BluePyMM">https://github.com/BlueBrain/BluePyMM</a>                         |
| Brainbuilder         | BBP/EPFL software package         | not yet open source                                                                                               |
| Brayns               | BBP/EPFL software package         | <a href="https://github.com/BlueBrain/Brayns">https://github.com/BlueBrain/Brayns</a>                             |
| circuit-build        | BBP/EPFL software package         | not yet open source                                                                                               |
| CoreNEURON           | BBP/EPFL software package         | <a href="https://github.com/BlueBrain/CoreNeuron">https://github.com/BlueBrain/CoreNeuron</a>                     |
| eFEL                 | BBP/EPFL software package         | <a href="https://github.com/BlueBrain/eFEL">https://github.com/BlueBrain/eFEL</a>                                 |
| Elephant             | Elephant authors and contributors | <a href="https://doi.org/10.5281/zenodo.1186602">https://doi.org/10.5281/zenodo.1186602</a>                       |
| EMSim                | BBP/EPFL software package         | <a href="https://github.com/BlueBrain/EMSim">https://github.com/BlueBrain/EMSim</a>                               |
| Hippounit            | KOKI software package             | <a href="https://github.com/KaliLab/hippounit">https://github.com/KaliLab/hippounit</a>                           |
| ITK-SNAP             | University of Pennsylvania        | <a href="http://www.itksnap.org/">http://www.itksnap.org/</a>                                                     |
| morphology-workflows | BBP/EPFL software package         | <a href="https://github.com/BlueBrain/morphology-workflows">https://github.com/BlueBrain/morphology-workflows</a> |
| mtspec               | pypi python package               | <a href="https://pypi.org/project/mtspec/">https://pypi.org/project/mtspec/</a>                                   |
| neo                  | The NeuralEnsemble Initiative     | <a href="https://github.com/NeuralEnsemble/python-neo">https://github.com/NeuralEnsemble/python-neo</a>           |
| NeuroMorphoVis       | BBP/EPFL software package         | <a href="https://github.com/BlueBrain/NeuroMorphoVis">https://github.com/BlueBrain/NeuroMorphoVis</a>             |
| NeuroM               | BBP/EPFL software package         | <a href="https://github.com/BlueBrain/NeuroM">https://github.com/BlueBrain/NeuroM</a>                             |
| NeuroR               | BBP/EPFL software package         | <a href="https://github.com/BlueBrain/NeuroR">https://github.com/BlueBrain/NeuroR</a>                             |
| projectionizer       | BBP/EPFL software package         | not yet open source                                                                                               |
| psp-validation       | BBP/EPFL software package         | not yet open source                                                                                               |
| regiodesics          | BBP/EPFL software package         | not yet open source                                                                                               |
| TMD                  | BBP/EPFL software package         | <a href="https://github.com/BlueBrain/TMD">https://github.com/BlueBrain/TMD</a>                                   |
| voxcell              | BBP/EPFL software package         | <a href="https://github.com/BlueBrain/voxcell">https://github.com/BlueBrain/voxcell</a>                           |

Table 1: List of software used

## 904 8 References

- 905 Aad, G., & Abbott, B. (2015). Combined measurement of the Higgs boson mass in *pp* collisions at  
906  $\sqrt{s} = 7$  and 8 TeV with the ATLAS and CMS experiments. *Physical Review Letters*, *114*(19).  
907 <https://doi.org/10.1103/physrevlett.114.191803>
- 908 Abdellah, M., Hernando, J., Eilemann, S., Lapere, S., Antille, N., Markram, H., & Schürmann, F.  
909 (2018). NeuroMorphoVis: A collaborative framework for analysis and visualization of neuronal  
910 morphology skeletons reconstructed from microscopy stacks. *Bioinformatics (Oxford, England)*,  
911 *34*(13), i574–i582. <https://doi.org/10.1093/bioinformatics/bty231>
- 912 Addison, P., Walker, J., & Guido, R. (2009). Time–frequency analysis of biosignals. *IEEE Eng. Med.*  
913 *Biol. Mag.*, *28*(5), 14–29. <https://doi.org/10.1109/MEMB.2009.934244>
- 914 Agoston, M. K. (2004). *Computer graphics and geometric modeling: Implementation and algorithms*.  
915 Springer.
- 916 Aika, Y., Ren, J., Kosaka, K., & Kosaka, T. (1994). Quantitative analysis of GABA-like-immunoreactive  
917 and parvalbumin-containing neurons in the CA1 region of the rat hippocampus using a stere-  
918 ological method, the disector. *Experimental Brain Research*, *99*(2). [https://doi.org/10.1007/](https://doi.org/10.1007/BF00239593)  
919 [BF00239593](https://doi.org/10.1007/BF00239593)
- 920 Ali, A. B., Deuchars, J., Pawelzik, H., & Thomson, A. M. (1998). CA1 pyramidal to basket and bis-  
921 tratified cell EPSPs: Dual intracellular recordings in rat hippocampal slices. *J. Physiol.*, *507* (  
922 *Pt 1*), 201–217.
- 923 Ali, A. B. (2011). CB1 modulation of temporally distinct synaptic facilitation among local circuit in-  
924 terneurons mediated by n-type calcium channels in CA1. *Journal of Neurophysiology*, *105*(3),  
925 1051–1062. <https://doi.org/10.1152/jn.00831.2010>
- 926 Ali, A. B., Bannister, A. P., & Thomson, A. M. (1999). IPSPs elicited in CA1 pyramidal cells by  
927 putative basket cells in slices of adult rat hippocampus: Basket cell IPSPs in CA1 pyramidal  
928 cells. *European Journal of Neuroscience*, *11*(5), 1741–1753. [https://doi.org/10.1046/j.1460-](https://doi.org/10.1046/j.1460-9568.1999.00592.x)  
929 [9568.1999.00592.x](https://doi.org/10.1046/j.1460-9568.1999.00592.x)
- 930 Ali, A. B., & Thomson, A. M. (2008). Synaptic alpha 5 subunit-containing GABAA receptors mediate  
931 IPSPs elicited by dendrite-preferring cells in rat neocortex. *Cereb. Cortex*, *18*(6), 1260–1271.
- 932 Amaral, D. G., & Witter, M. P. (1989). The three-dimensional organization of the hippocampal forma-  
933 tion: A review of anatomical data. *Neuroscience*, *31*(3), 571–591. [https://doi.org/10.1016/](https://doi.org/10.1016/0306-4522(89)90424-7)  
934 [0306-4522\(89\)90424-7](https://doi.org/10.1016/0306-4522(89)90424-7)
- 935 Amsalem, O., Van Geit, W., Muller, E., Markram, H., & Segev, I. (2016). From neuron biophysics  
936 to orientation selectivity in electrically coupled networks of neocortical I2/3 large basket cells.  
937 *Cereb. Cortex*, *26*(8), 3655–3668. <https://doi.org/10.1093/cercor/bhw166>
- 938 Andrásfalvy, B. K., & Magee, J. C. (2001). Distance-dependent increase in AMPA receptor number  
939 in the dendrites of adult hippocampal CA1 pyramidal neurons. *The Journal of Neuroscience*,  
940 *21*(23), 9151–9159. <https://doi.org/10.1523/JNEUROSCI.21-23-09151.2001>
- 941 Anwar, H., Riachi, I., Hill, S., Schürmann, F., & Markram, H. (2009). An approach to capturing neuron  
942 morphological diversity. In *Computational modeling methods for neuroscientists* (pp. 211–232).  
943 The MIT Press. <https://doi.org/10.7551/mitpress/9780262013277.003.0010>
- 944 Ascoli, G. A., Gasparini, S., Medinilla, V., & Migliore, M. (2010). Local control of postinhibitory rebound  
945 spiking in CA1 pyramidal neuron dendrites. *The Journal of Neuroscience: The Official Journal of*

- 946 *the Society for Neuroscience*, 30(18), 6434–6442. [https://doi.org/10.1523/JNEUROSCI.4066-](https://doi.org/10.1523/JNEUROSCI.4066-09.2010)  
947 09.2010
- 948 Awile, O., Kumbhar, P., Cornu, N., Dura-Bernal, S., King, J. G., Lupton, O., Magkanaris, I., McDougal,  
949 R. A., Newton, A. J. H., Pereira, F., Savulescu, A., Carnevale, N. T., Lytton, W. W., Hines, M. L.,  
950 & Schurmann, F. (2022). Modernizing the NEURON simulator for sustainability, portability, and  
951 performance. *Front. Neuroinform.*, 16, 884046. <https://doi.org/10.3389/fninf.2022.884046>
- 952 Baimbridge, K. G., & Miller, J. J. (1982). Immunohistochemical localization of calcium-binding protein  
953 in the cerebellum, hippocampal formation and olfactory bulb of the rat. *Brain Research*, 245(2),  
954 223–229. [https://doi.org/10.1016/0006-8993\(82\)90804-6](https://doi.org/10.1016/0006-8993(82)90804-6)
- 955 Bannister, N. J., & Larkman, A. U. (1995). Dendritic morphology of CA1 pyramidal neurones from  
956 the rat hippocampus: I. branching patterns. *The Journal of Comparative Neurology*, 360(1),  
957 150–160. <https://doi.org/10.1002/cne.903600111>
- 958 Barros-Zulaica, N., Rahmon, J., Chindemi, G., Perin, R., Markram, H., Muller, E., & Ramaswamy,  
959 S. (2019). Estimating the readily-releasable vesicle pool size at synaptic connections in the  
960 neocortex. *Frontiers in Synaptic Neuroscience*, 11, 29. [https://doi.org/10.3389/fnsyn.2019.](https://doi.org/10.3389/fnsyn.2019.00029)  
961 00029
- 962 Belluscio, M. A., Mizuseki, K., Schmidt, R., Kempter, R., & Buzsáki, G. (2012). Cross-frequency phase-  
963 phase coupling between theta and gamma oscillations in the hippocampus. *J. Neurosci.*, 32(2),  
964 423–435. <https://doi.org/10.1523/JNEUROSCI.4122-11.2012>
- 965 Bezaire, M. J., Raikov, I., Burk, K., Vyas, D., & Soltesz, I. (2016). Interneuronal mechanisms of hip-  
966 pocampal theta oscillations in a full-scale model of the rodent CA1 circuit. *eLife*, 5. <https://doi.org/10.7554/eLife.18566>
- 967
- 968 Bezaire, M. J., & Soltesz, I. (2013). Quantitative assessment of CA1 local circuits: Knowledge base  
969 for interneuron-pyramidal cell connectivity: Quantitative assessment of ca1 local circuits. *Hip-*  
970 *pocampus*, 23(9), 751–785. <https://doi.org/10.1002/hipo.22141>
- 971 Bianchi, R., & Wong, R. K. (1994). Carbachol-induced synchronized rhythmic bursts in CA3 neurons  
972 of guinea pig hippocampus in vitro. *Journal of Neurophysiology*, 72(1), 131–138. [https://doi.](https://doi.org/10.1152/jn.1994.72.1.131)  
973 [org/10.1152/jn.1994.72.1.131](https://doi.org/10.1152/jn.1994.72.1.131)
- 974 Biro, A. A. (2005). Quantal size is independent of the release probability at hippocampal excitatory  
975 synapses. *Journal of Neuroscience*, 25(1), 223–232. [https://doi.org/10.1523/JNEUROSCI.](https://doi.org/10.1523/JNEUROSCI.3688-04.2005)  
976 3688-04.2005
- 977 Bokil, H., Andrews, P., Kulkarni, J. E., Mehta, S., & Mitra, P. P. (2010). Chronux: A platform for  
978 analyzing neural signals. *J. Neurosci. Methods*, 192(1), 146–151. [https://doi.org/10.1016/j.](https://doi.org/10.1016/j.jneumeth.2010.06.020)  
979 [jneumeth.2010.06.020](https://doi.org/10.1016/j.jneumeth.2010.06.020)
- 980 Brankack, J., Stewart, M., & Fox, S. E. (1993). Current source density analysis of the hippocampal  
981 theta rhythm: Associated sustained potentials and candidate synaptic generators. *Brain Res.*,  
982 615(2), 310–327. [https://doi.org/10.1016/0006-8993\(93\)90043-m](https://doi.org/10.1016/0006-8993(93)90043-m)
- 983 Buchanan, K. A., Petrovic, M. M., Chamberlain, S. E., Marrion, N. V., & Mellor, J. R. (2010). Facil-  
984 itation of long-term potentiation by muscarinic m1 receptors is mediated by inhibition of SK  
985 channels. *Neuron*, 68(5), 948–963. <https://doi.org/10.1016/j.neuron.2010.11.018>

- 986 Buhl, E. H., Han, Z. S., Lorinczi, Z., Stezhka, V. V., Karnup, S. V., & Somogyi, P. (1994). Physio-  
987 logical properties of anatomically identified axo-axonic cells in the rat hippocampus. *Journal of*  
988 *Neurophysiology*, *71*(4), 1289–1307. <https://doi.org/10.1152/jn.1994.71.4.1289>
- 989 Buhl, E. H., Halasy, K., & Somogyi, P. (1994). Diverse sources of hippocampal unitary inhibitory  
990 postsynaptic potentials and the number of synaptic release sites. *Nature*, *368*(6474), 823–828.  
991 <https://doi.org/10.1038/368823a0>
- 992 Buzsáki, G., Rappelsberger, P., & Kellényi, L. (1985). Depth profiles of hippocampal rhythmic slow  
993 activity ('theta rhythm') depend on behaviour. *Electroencephalogr. Clin. Neurophysiol.*, *61*(1),  
994 77–88. [https://doi.org/10.1016/0013-4694\(85\)91075-2](https://doi.org/10.1016/0013-4694(85)91075-2)
- 995 Buzsáki, G. (2002). Theta oscillations in the hippocampus. *Neuron*, *33*(3), 325–340. [https://doi.org/10.1016/s0896-6273\(02\)00586-x](https://doi.org/10.1016/s0896-6273(02)00586-x)
- 997 Buzsáki, G. (2005). Theta rhythm of navigation: Link between path integration and landmark navigation,  
998 episodic and semantic memory. *Hippocampus*, *15*(7), 827–840. <https://doi.org/10.1002/hipo.20113>
- 1000 Buzsáki, G. (2015). Hippocampal sharp wave-ripple: A cognitive biomarker for episodic memory and  
1001 planning: HIPPOCAMPAL SHARP WAVE-RIPPLE. *Hippocampus*, *25*(10), 1073–1188. <https://doi.org/10.1002/hipo.22488>
- 1002
- 1003 Cea-del Rio, C. A., Lawrence, J. J., Erdelyi, F., Szabó, G., & McBain, C. J. (2011). Cholinergic modu-  
1004 lation amplifies the intrinsic oscillatory properties of CA1 hippocampal cholecystokinin-positive  
1005 interneurons: Cholinergic modulation and CA1 cholecystokinin-positive interneurons. *The Jour-*  
1006 *nal of Physiology*, *589*(3), 609–627. <https://doi.org/10.1113/jphysiol.2010.199422>
- 1007 Chindemi, G., Abdellah, M., Amsalem, O., Benavides-Piccione, R., Delattre, V., Doron, M., Ecker,  
1008 A., Jaquier, A. T., King, J., Kumbhar, P., Monney, C., Perin, R., Rössert, C., Tuncel, A. M.,  
1009 Van Geit, W., DeFelipe, J., Graupner, M., Segev, I., Markram, H., & Muller, E. B. (2022).  
1010 A calcium-based plasticity model for predicting long-term potentiation and depression in the  
1011 neocortex. *Nat. Commun.*, *13*(1), 3038. <https://doi.org/10.1038/s41467-022-30214-w>
- 1012 Colangelo, C., Shichkova, P., Keller, D., Markram, H., & Ramaswamy, S. (2019). Cellular, synaptic and  
1013 network effects of acetylcholine in the neocortex. *Frontiers in Neural Circuits*, *13*, 24. <https://doi.org/10.3389/fncir.2019.00024>
- 1014
- 1015 Colgin, L. L. (2013). Mechanisms and functions of theta rhythms. *Annual Review of Neuroscience*, *36*,  
1016 295–312. <https://doi.org/10.1146/annurev-neuro-062012-170330>
- 1017 Cornford, J. H., Mercier, M. S., Leite, M., Magloire, V., Häusser, M., & Kullmann, D. M. (2019).  
1018 Dendritic NMDA receptors in parvalbumin neurons enable strong and stable neuronal assemblies  
1019 (M. Bartos, G. L. Westbrook, C.-C. Lien, & J. C. Poncer, Eds.). *eLife*, *8*, e49872. <https://doi.org/10.7554/eLife.49872>
- 1020
- 1021 Cossart, R., Hirsch, J. C., Cannon, R. C., Dinoncourt, C., Wheal, H. V., Ben-Ari, Y., Esclapez, M., &  
1022 Bernard, C. (2000). Distribution of spontaneous currents along the somato-dendritic axis of rat  
1023 hippocampal CA1 pyramidal neurons. *Neuroscience*, *99*(4), 593–603. [https://doi.org/10.1016/s0306-4522\(00\)00231-1](https://doi.org/10.1016/s0306-4522(00)00231-1)
- 1024
- 1025 Csicsvari, J., Hirase, H., Czurko, A., & Buzsáki, G. (1998). Reliability and state dependence of pyrami-  
1026 dal cell-interneuron synapses in the hippocampus: An ensemble approach in the behaving rat.  
1027 *Neuron*, *21*(1), 179–189. [https://doi.org/10.1016/s0896-6273\(00\)80525-5](https://doi.org/10.1016/s0896-6273(00)80525-5)



- 1028 Csicsvari, J., Hirase, H., Czurkó, A., Mamiya, A., & Buzsáki, G. (1999). Oscillatory coupling of hip-  
1029 pocampal pyramidal cells and interneurons in the behaving rat. *J. Neurosci.*, *19*(1), 274–287.  
1030 <https://doi.org/10.1523/JNEUROSCI.19-01-00274.1999>
- 1031 Cutsuridis, V., Cobb, S., & Graham, B. P. (2010). Encoding and retrieval in a model of the hippocampal  
1032 CA1 microcircuit. *Hippocampus*, *20*(3), 423–446. <https://doi.org/10.1002/hipo.20661>
- 1033 Dai, K., Hernando, J., Billeh, Y. N., Gratiy, S. L., Planas, J., Davison, A. P., Dura-Bernal, S., Gleeson,  
1034 P., Devresse, A., Dichter, B. K., Gevaert, M., King, J. G., Van Geit, W. A. H., Povolotsky,  
1035 A. V., Muller, E., Courcol, J.-D., & Arkhipov, A. (2020). The SONATA data format for efficient  
1036 description of large-scale network models. *PLoS computational biology*, *16*(2), e1007696. <https://doi.org/10.1371/journal.pcbi.1007696>
- 1037
- 1038 Dannenberg, H., Young, K., & Hasselmo, M. (2017). Modulation of hippocampal circuits by muscarinic  
1039 and nicotinic receptors. *Front. Neural Circuits*, *11*, 102. [https://doi.org/10.3389/fncir.2017.](https://doi.org/10.3389/fncir.2017.00102)  
1040 00102
- 1041 Dasari, S., & Gullledge, A. T. (2011). M1 and m4 receptors modulate hippocampal pyramidal neurons.  
1042 *Journal of Neurophysiology*, *105*(2), 779–792. <https://doi.org/10.1152/jn.00686.2010>
- 1043 Debanne, D., Guérineau, N. C., Gähwiler, B. H., & Thompson, S. M. (1995). Physiology and phar-  
1044 macology of unitary synaptic connections between pairs of cells in areas CA3 and CA1 of rat  
1045 hippocampal slice cultures. *J. Neurophysiol.*, *73*(3), 1282–1294. [https://doi.org/10.1152/jn.](https://doi.org/10.1152/jn.1995.73.3.1282)  
1046 1995.73.3.1282
- 1047 Deguchi, Y., Donato, F., Galimberti, I., Cabuy, E., & Caroni, P. (2011). Temporally matched subpopu-  
1048 lations of selectively interconnected principal neurons in the hippocampus. *Nature Neuroscience*,  
1049 *14*(4), 495–504. <https://doi.org/10.1038/nn.2768>
- 1050 Denker, M., Yegenoglu, A., & Grün, S. (2018). Collaborative HPC-enabled workflows on the HBP  
1051 collaboratory using the elephant framework [Publisher: G-Node]. [https://doi.org/10.12751/](https://doi.org/10.12751/INCF.NI2018.0019)  
1052 INCF.NI2018.0019
- 1053 Deuchars, J., & Thomson, A. (1996). CA1 pyramid-pyramid connections in rat hippocampus in vitro:  
1054 Dual intracellular recordings with biocytin filling. *Neuroscience*, *74*(4), 1009–1018. [https://doi.](https://doi.org/10.1016/0306-4522(96)00251-5)  
1055 org/10.1016/0306-4522(96)00251-5
- 1056 Dumas, T. C., Uttaro, M. R., Barriga, C., Brinkley, T., Halavi, M., Wright, S. N., Ferrante, M., Evans,  
1057 R. C., Hawes, S. L., & Sanders, E. M. (2018). Removal of area CA3 from hippocampal slices  
1058 induces postsynaptic plasticity at schaffer collateral synapses that normalizes CA1 pyramidal cell  
1059 discharge. *Neuroscience Letters*, *678*, 55–61. <https://doi.org/10.1016/j.neulet.2018.05.011>
- 1060 Ecker, A., Romani, A., Sáray, S., Káli, S., Migliore, M., Falck, J., Lange, S., Mercer, A., Thomson, A. M.,  
1061 Muller, E., Reimann, M. W., & Ramaswamy, S. (2020). Data-driven integration of hippocampal  
1062 CA1 synaptic physiology in silico. *Hippocampus*, *30*(11), 1129–1145. [https://doi.org/10.1002/](https://doi.org/10.1002/hipo.23220)  
1063 hipo.23220
- 1064 Economides, G., Falk, S., & Mercer, A. (2018). Biocytin recovery and 3D reconstructions of filled  
1065 hippocampal CA2 interneurons. *J. Vis. Exp.*, (141). <https://doi.org/10.3791/58592>
- 1066 Elfant, D., Pál, B. Z., Emptage, N., & Capogna, M. (2008). Specific inhibitory synapses shift the balance  
1067 from feedforward to feedback inhibition of hippocampal CA1 pyramidal cells. *The European*  
1068 *Journal of Neuroscience*, *27*(1), 104–113. <https://doi.org/10.1111/j.1460-9568.2007.06001.x>

- 1069 Esclapez, M., Hirsch, J. C., Ben-Ari, Y., & Bernard, C. (1999a). Newly formed excitatory pathways  
1070 provide a substrate for hyperexcitability in experimental temporal lobe epilepsy. *J. Comp. Neurol.*,  
1071 *408*(4), 449–460. [https://doi.org/10.1002/\(sici\)1096-9861\(19990614\)408:4<449::aid-](https://doi.org/10.1002/(sici)1096-9861(19990614)408:4<449::aid-cne1>3.0.co;2-r)  
1072 [cne1>3.0.co;2-r](https://doi.org/10.1002/(sici)1096-9861(19990614)408:4<449::aid-cne1>3.0.co;2-r)
- 1073 Esclapez, M., Hirsch, J. C., Ben-Ari, Y., & Bernard, C. (1999b). Newly formed excitatory pathways  
1074 provide a substrate for hyperexcitability in experimental temporal lobe epilepsy. *The Jour-*  
1075 *nal of Comparative Neurology*, *408*(4), 449–460. [https://doi.org/10.1002/\(SICI\)1096-](https://doi.org/10.1002/(SICI)1096-9861(19990614)408:4<449::AID-CNE1>3.0.CO;2-R)  
1076 [9861\(19990614\)408:4<449::AID-CNE1>3.0.CO;2-R](https://doi.org/10.1002/(SICI)1096-9861(19990614)408:4<449::AID-CNE1>3.0.CO;2-R)
- 1077 Fan, X., & Markram, H. (2019). A brief history of simulation neuroscience. *Front. Neuroinform.*, *13*,  
1078 32. <https://doi.org/10.3389/fninf.2019.00032>
- 1079 Fellous, J. M., & Sejnowski, T. J. (2000). Cholinergic induction of oscillations in the hippocampal slice  
1080 in the slow (0.5-2 Hz), theta (5-12 Hz), and gamma (35-70 Hz) bands. *Hippocampus*, *10*(2),  
1081 187–197. [https://doi.org/10.1002/\(SICI\)1098-1063\(2000\)10:2<187::AID-HIPO8>3.0.CO;2-M](https://doi.org/10.1002/(SICI)1098-1063(2000)10:2<187::AID-HIPO8>3.0.CO;2-M)
- 1082 Fisahn, A., Pike, F. G., Buhl, E. H., & Paulsen, O. (1998). Cholinergic induction of network oscillations at  
1083 40 Hz in the hippocampus in vitro. *Nature*, *394*(6689), 186–189. <https://doi.org/10.1038/28179>
- 1084 Földy, C., Lee, S.-H., Morgan, R. J., & Soltesz, I. (2010). Regulation of fast-spiking basket cell synapses  
1085 by the chloride channel ClC-2. *Nature Neuroscience*, *13*(9), 1047–1049. [https://doi.org/10.](https://doi.org/10.1038/nn.2609)  
1086 [1038/nn.2609](https://doi.org/10.1038/nn.2609)
- 1087 Freund, T., & Buzsáki, G. (1996). Interneurons of the hippocampus. *Hippocampus*, *6*(4), 347–470.  
1088 [https://doi.org/10.1002/\(SICI\)1098-1063\(1996\)6:4<347::AID-HIPO1>3.0.CO;2-I](https://doi.org/10.1002/(SICI)1098-1063(1996)6:4<347::AID-HIPO1>3.0.CO;2-I)
- 1089 Fuentealba, P., Begum, R., Capogna, M., Jinno, S., Márton, L. F., Csicsvari, J., Thomson, A., Somogyi,  
1090 P., & Klausberger, T. (2008). Ivy cells: A population of nitric-oxide-producing, slow-spiking  
1091 GABAergic neurons and their involvement in hippocampal network activity. *Neuron*, *57*(6),  
1092 917–929. <https://doi.org/10.1016/j.neuron.2008.01.034>
- 1093 Fuhrmann, G., Segev, I., Markram, H., & Tsodyks, M. (2002). Coding of temporal information by  
1094 activity-dependent synapses. *Journal of Neurophysiology*, *87*(1), 140–148. [https://doi.org/10.](https://doi.org/10.1152/jn.00258.2001)  
1095 [1152/jn.00258.2001](https://doi.org/10.1152/jn.00258.2001)
- 1096 Gal, E., London, M., Globerson, A., Ramaswamy, S., Reimann, M. W., Muller, E., Markram, H., &  
1097 Segev, I. (2017). Rich cell-type-specific network topology in neocortical microcircuitry. *Nature*  
1098 *Neuroscience*, *20*(7), 1004–1013. <https://doi.org/10.1038/nn.4576>
- 1099 Gerkin, R. C., Jarvis, R. J., & Crook, S. M. (2018). Towards systematic, data-driven validation of a  
1100 collaborative, multi-scale model of *Caenorhabditis elegans*. *Philos. Trans. R. Soc. Lond. B Biol.*  
1101 *Sci.*, *373*(1758). <https://doi.org/10.1098/rstb.2017.0381>
- 1102 Giacomelli, G., Tegolo, D., Spera, E., & Migliore, M. (2021). On the structural connectivity of large-scale  
1103 models of brain networks at cellular level. *Scientific Reports*, *11*(1), 4345. [https://doi.org/10.](https://doi.org/10.1038/s41598-021-83759-z)  
1104 [1038/s41598-021-83759-z](https://doi.org/10.1038/s41598-021-83759-z)
- 1105 Giaume, C., Koulakoff, A., Roux, L., Holcman, D., & Rouach, N. (2010). Astroglial networks: A step  
1106 further in neuroglial and gliovascular interactions. *Nat. Rev. Neurosci.*, *11*(2), 87–99. [https://](https://doi.org/10.1038/nrn2757)  
1107 [doi.org/10.1038/nrn2757](https://doi.org/10.1038/nrn2757)
- 1108 Glickfeld, L. L., & Scanziani, M. (2006). Distinct timing in the activity of cannabinoid-sensitive and  
1109 cannabinoid-insensitive basket cells. *Nature Neuroscience*, *9*(6), 807–815. [https://doi.org/10.](https://doi.org/10.1038/nn1688)  
1110 [1038/nn1688](https://doi.org/10.1038/nn1688)

- 1111 Golding, N. L., Kath, W. L., & Spruston, N. (2001). Dichotomy of action-potential backpropagation  
1112 in CA1 pyramidal neuron dendrites. *J. Neurophysiol.*, *86*(6), 2998–3010. <https://doi.org/10.1152/jn.2001.86.6.2998>  
1113
- 1114 Goutagny, R., Jackson, J., & Williams, S. (2009). Self-generated theta oscillations in the hippocampus.  
1115 *Nature Neuroscience*, *12*(12), 1491–1493. <https://doi.org/10.1038/nn.2440>
- 1116 Goyal, A., Miller, J., Qasim, S. E., Watrous, A. J., Zhang, H., Stein, J. M., Inman, C. S., Gross,  
1117 R. E., Willie, J. T., Lega, B., Lin, J.-J., Sharan, A., Wu, C., Sperling, M. R., Sheth, S. A.,  
1118 McKhann, G. M., Smith, E. H., Schevon, C., & Jacobs, J. (2020). Functionally distinct high  
1119 and low theta oscillations in the human hippocampus. *Nature Communications*, *11*(1), 2469.  
1120 <https://doi.org/10.1038/s41467-020-15670-6>
- 1121 Grastyan, E., Lissak, K., Madarasz, I., & Donhoff, H. (1959). Hippocampal electrical activity during  
1122 the development of conditioned reflexes. *Electroencephalogr. Clin. Neurophysiol.*, *11*(3), 409–  
1123 430. [https://doi.org/10.1016/0013-4694\(59\)90040-9](https://doi.org/10.1016/0013-4694(59)90040-9)
- 1124 Graves, A. R., Moore, S. J., Bloss, E. B., Mensh, B. D., Kath, W. L., & Spruston, N. (2012). Hippocampal  
1125 pyramidal neurons comprise two distinct cell types that are countermodulated by metabotropic  
1126 receptors. *Neuron*, *76*(4), 776–789. <https://doi.org/10.1016/j.neuron.2012.09.036>
- 1127 Green, J. D., & Arduini, A. A. (1954). Hippocampal electrical activity in arousal. *J. Neurophysiol.*,  
1128 *17*(6), 533–557. <https://doi.org/10.1152/jn.1954.17.6.533>
- 1129 Hájos, N., & Mody, I. (1997). Synaptic communication among hippocampal interneurons: Properties of  
1130 spontaneous IPSCs in morphologically identified cells. *J. Neurosci.*, *17*(21), 8427–8442.
- 1131 Hangya, B., Borhegyi, Z., Szilágyi, N., Freund, T. F., & Varga, V. (2009). GABAergic neurons of the  
1132 medial septum lead the hippocampal network during theta activity. *The Journal of Neuroscience:  
1133 The Official Journal of the Society for Neuroscience*, *29*(25), 8094–8102. <https://doi.org/10.1523/JNEUROSCI.5665-08.2009>  
1134
- 1135 Hasselmo, M., & Schnell, E. (1994). Laminar selectivity of the cholinergic suppression of synaptic  
1136 transmission in rat hippocampal region CA1: Computational modeling and brain slice physiology.  
1137 *The Journal of Neuroscience*, *14*(6), 3898–3914. [https://doi.org/10.1523/JNEUROSCI.14-06-  
1138 03898.1994](https://doi.org/10.1523/JNEUROSCI.14-06-03898.1994)
- 1139 Hasselmo, M. E. (2006). The role of acetylcholine in learning and memory. *Current Opinion in Neuro-  
1140 biology*, *16*(6), 710–715. <https://doi.org/10.1016/j.conb.2006.09.002>
- 1141 Hasselmo, M. E., Alexander, A. S., Dannenberg, H., & Newman, E. L. (2020). Overview of computational  
1142 models of hippocampus and related structures: Introduction to the special issue. *Hippocampus*,  
1143 *30*(4), 295–301. <https://doi.org/10.1002/hipo.23201>
- 1144 Hoffman, D. A., & Johnston, D. (1999). Neuromodulation of dendritic action potentials. *J. Neurophys-  
1145 iol.*, *81*(1), 408–411. <https://doi.org/10.1152/jn.1999.81.1.408>
- 1146 Hoffman, D. A., Magee, J. C., Colbert, C. M., & Johnston, D. (1997). K<sup>+</sup> channel regulation of  
1147 signal propagation in dendrites of hippocampal pyramidal neurons. *Nature*, *387*(6636), 869–  
1148 875. <https://doi.org/10.1038/43119>
- 1149 Hood, L., & Rowen, L. (2013). The human genome project: Big science transforms biology and medicine.  
1150 *Genome Medicine*, *5*(9), 79. <https://doi.org/10.1186/gm483>

- 1151 Hu, H., Martina, M., & Jonas, P. (2010). Dendritic mechanisms underlying rapid synaptic activation  
1152 of fast-spiking hippocampal interneurons. *Science (New York, N.Y.)*, 327(5961), 52–58. <https://doi.org/10.1126/science.1177876>  
1153
- 1154 Hughes, D. I., Bannister, A., Pawelzik, H., & Thomson, A. M. (2000). Double immunofluorescence,  
1155 peroxidase labelling and ultrastructural analysis of interneurons following prolonged electro-  
1156 physiological recordings in vitro. *Journal of Neuroscience Methods*, 101(2), 107–116. [https://doi.org/10.1016/S0165-0270\(00\)00254-5](https://doi.org/10.1016/S0165-0270(00)00254-5)  
1157
- 1158 Iavarone, E., Simko, J., Shi, Y., Bertschy, M., Garcia-Amado, M., Litvak, P., Kaufmann, A.-K., O'Reilly,  
1159 C., Amsalem, O., Abdellah, M., Chevtchenko, G., Coste, B., Courcol, J.-D., Ecker, A., Favreau,  
1160 C., Fleury, A. C., Van Geit, W., Gevaert, M., Guerrero, N. R., . . . Hill, S. L. (2023). Thalamic  
1161 control of sensory processing and spindles in a biophysical somatosensory thalamoreticular circuit  
1162 model of wakefulness and sleep. *Cell Rep.*, 42(3), 112200. <https://doi.org/10.1016/j.celrep.2023.112200>  
1163
- 1164 Ishizuka, N., Weber, J., & Amaral, D. G. (1990). Organization of intrahippocampal projections origi-  
1165 nating from CA3 pyramidal cells in the rat. *J. Comp. Neurol.*, 295(4), 580–623. <https://doi.org/10.1002/cne.902950407>  
1166
- 1167 Ito, H. T., & Schuman, E. M. (2009). Distance-dependent homeostatic synaptic scaling mediated by  
1168 a-type potassium channels. *Front. Cell. Neurosci.*, 3, 15. <https://doi.org/10.3389/neuro.03.015.2009>  
1169
- 1170 Jackson, J., Amilhon, B., Goutagny, R., Bott, J.-B., Manseau, F., Kortleven, C., Bressler, S. L., &  
1171 Williams, S. (2014). Reversal of theta rhythm flow through intact hippocampal circuits. *Nature*  
1172 *Neuroscience*, 17(10), 1362–1370. <https://doi.org/10.1038/nn.3803>
- 1173 Jung, R., & Kornmüller, A. E. (1938). Eine methodik der ableitung iokalasierter potentialschwankungen  
1174 aus subcorticalen hirngebieten. *Archiv für Psychiatrie und Nervenkrankheiten*, 109(1), 1–30.  
1175 <https://doi.org/10.1007/BF02157817>
- 1176 Kamondi, A., Acsády, L., Wang, X. J., & Buzsáki, G. (1998). Theta oscillations in somata and dendrites  
1177 of hippocampal pyramidal cells in vivo: Activity-dependent phase-precession of action potentials.  
1178 *Hippocampus*, 8(3), 244–261. [https://doi.org/10.1002/\(SICI\)1098-1063\(1998\)8:3<244::AID-HIPO7>3.0.CO;2-J](https://doi.org/10.1002/(SICI)1098-1063(1998)8:3<244::AID-HIPO7>3.0.CO;2-J)  
1179
- 1180 Kanari, L., Dictus, H., Chalimourda, A., Arnaudon, A., Van Geit, W., Coste, B., Shillcock, J., Hess,  
1181 K., & Markram, H. (2022). Computational synthesis of cortical dendritic morphologies. *Cell*  
1182 *Reports*, 39(1), 110586. <https://doi.org/10.1016/j.celrep.2022.110586>
- 1183 Kanari, L., Dłotko, P., Scolamiero, M., Levi, R., Shillcock, J., Hess, K., & Markram, H. (2018). A  
1184 topological representation of branching neuronal morphologies. *Neuroinformatics*, 16(1), 3–13.  
1185 <https://doi.org/10.1007/s12021-017-9341-1>
- 1186 Kawasaki, H., & Avoli, M. (1996). Excitatory effects induced by carbachol on bursting neurons of the rat  
1187 subiculum. *Neuroscience Letters*, 219(1), 1–4. [https://doi.org/10.1016/S0304-3940\(96\)13175-X](https://doi.org/10.1016/S0304-3940(96)13175-X)  
1188
- 1189 Klausberger, T. (2005). Complementary roles of cholecystinin- and parvalbumin-expressing GABAergic  
1190 neurons in hippocampal network oscillations. *Journal of Neuroscience*, 25(42), 9782–9793. <https://doi.org/10.1523/JNEUROSCI.3269-05.2005>  
1191

- 1192 Klausberger, T., Magill, P. J., Márton, L. F., Roberts, J. D. B., Cobden, P. M., Buzsáki, G., & Somogyi,  
1193 P. (2003). Brain-state- and cell-type-specific firing of hippocampal interneurons in vivo. *Nature*,  
1194 421(6925), 844–848. <https://doi.org/10.1038/nature01374>
- 1195 Klausberger, T., Márton, L. F., Baude, A., Roberts, J. D. B., Magill, P. J., & Somogyi, P. (2004). Spike  
1196 timing of dendrite-targeting bistratified cells during hippocampal network oscillations in vivo.  
1197 *Nature Neuroscience*, 7(1), 41–47. <https://doi.org/10.1038/nn1159>
- 1198 Knowles, W. D., & Schwartzkroin, P. A. (1981). Local circuit synaptic interactions in hippocampal brain  
1199 slices [Publisher: Society for Neuroscience Section: Articles]. *Journal of Neuroscience*, 1(3), 318–  
1200 322. <https://doi.org/10.1523/JNEUROSCI.01-03-00318.1981>
- 1201 Kocsis, B., Bragin, A., & Buzsáki, G. (1999). Interdependence of multiple theta generators in the  
1202 hippocampus: A partial coherence analysis. *J. Neurosci.*, 19(14), 6200–6212. <https://doi.org/10.1523/JNEUROSCI.19-14-06200.1999>
- 1203
- 1204 Kumbhar, P., Hines, M., Fouriaux, J., Ovcharenko, A., King, J., Delalondre, F., & Schürmann, F. (2019).  
1205 Coreneuron : An optimized compute engine for the neuron simulator. *Frontiers in Neuroinfor-*  
1206 *matics*, 13. <https://doi.org/10.3389/fninf.2019.00063>
- 1207 Lawrence, J. J., Statland, J. M., Grinspan, Z. M., & McBain, C. J. (2006). Cell type-specific dependence  
1208 of muscarinic signalling in mouse hippocampal stratum oriens interneurons: mAChR modulation  
1209 of str. oriens interneurons. *The Journal of Physiology*, 570(3), 595–610. <https://doi.org/10.1113/jphysiol.2005.100875>
- 1210
- 1211 Le Bon-Jego, M., & Yuste, R. (2007). Persistently active, pacemaker-like neurons in neocortex. *Front.*  
1212 *Neurosci.*, 1(1), 123–129. <https://doi.org/10.3389/neuro.01.1.1.009.2007>
- 1213 Le Roux, N., Cabezas, C., Böhm, U. L., & Poncer, J. C. (2013). Input-specific learning rules at excitatory  
1214 synapses onto hippocampal parvalbumin-expressing interneurons. *The Journal of Physiology*,  
1215 591(7), 1809–1822. <https://doi.org/10.1113/jphysiol.2012.245852>
- 1216 Lee, S.-H., Marchionni, I., Bezair, M., Varga, C., Danielson, N., Lovett-Barron, M., Losonczy, A., &  
1217 Soltesz, I. (2014). Parvalbumin-positive basket cells differentiate among hippocampal pyramidal  
1218 cells. *Neuron*, 82(5), 1129–1144. <https://doi.org/10.1016/j.neuron.2014.03.034>
- 1219 Lee, S.-H., Foldy, C., & Soltesz, I. (2010). Distinct endocannabinoid control of GABA release at periso-  
1220 matic and dendritic synapses in the hippocampus. *Journal of Neuroscience*, 30(23), 7993–8000.  
1221 <https://doi.org/10.1523/jneurosci.6238-09.2010>
- 1222 Li, X.-G., Somogyi, P., Ylinen, A., & Buzsáki, G. (1994). The hippocampal CA3 network: An in vivo  
1223 intracellular labeling study: THE HIPPOCAMPAL CA3 NETWORK. *Journal of Comparative*  
1224 *Neurology*, 339(2), 181–208. <https://doi.org/10.1002/cne.903390204>
- 1225 Lyttle, D., Gereke, B., Lin, K. K., & Fellous, J.-M. (2013). Spatial scale and place field stability in  
1226 a grid-to-place cell model of the dorsoventral axis of the hippocampus. *Hippocampus*, 23(8),  
1227 729–744. <https://doi.org/10.1002/hipo.22132>
- 1228 Maccaferri, G., David, J., Roberts, B., Szucs, P., Cottingham, C. A., & Somogyi, P. (2000). Cell  
1229 surface domain specific postsynaptic currents evoked by identified GABAergic neurones in rat  
1230 hippocampus *in vitro*. *The Journal of Physiology*, 524(1), 91–116. <https://doi.org/10.1111/j.1469-7793.2000.t01-3-00091.x>
- 1231
- 1232 Magee, J. C. (1999). Dendritic Ih normalizes temporal summation in hippocampal CA1 neurons. *Nat.*  
1233 *Neurosci.*, 2(6), 508–514. <https://doi.org/10.1038/9158>



- 1234 Magee, J. C., & Cook, E. P. (2000). Somatic EPSP amplitude is independent of synapse location in  
1235 hippocampal pyramidal neurons. *Nat. Neurosci.*, 3(9), 895–903. <https://doi.org/10.1038/78800>
- 1236 Malik, R., Dougherty, K. A., Parikh, K., Byrne, C., & Johnston, D. (2016a). Mapping the electro-  
1237 physiological and morphological properties of CA1 pyramidal neurons along the longitudinal  
1238 hippocampal axis. *Hippocampus*, 26(3), 341–361. <https://doi.org/10.1002/hipo.22526>
- 1239 Malik, R., Dougherty, K. A., Parikh, K., Byrne, C., & Johnston, D. (2016b). Mapping the electro-  
1240 physiological and morphological properties of CA1 pyramidal neurons along the longitudinal  
1241 hippocampal axis. *Hippocampus*, 26(3), 341–361. <https://doi.org/10.1002/hipo.22526>
- 1242 Markram, H., Lübke, J., Frotscher, M., Roth, A., & Sakmann, B. (1997). Physiology and anatomy of  
1243 synaptic connections between thick tufted pyramidal neurones in the developing rat neocortex.  
1244 *The Journal of Physiology*, 500, 409–440. Retrieved September 21, 2022, from [https://www.](https://www.ncbi.nlm.nih.gov/pmc/articles/PMC1159394/)  
1245 [ncbi.nlm.nih.gov/pmc/articles/PMC1159394/](https://www.ncbi.nlm.nih.gov/pmc/articles/PMC1159394/)
- 1246 Markram, H., Wang, Y., & Tsodyks, M. (1998). Differential signaling via the same axon of neocortical  
1247 pyramidal neurons. *Proceedings of the National Academy of Sciences of the United States of*  
1248 *America*, 95(9), 5323–5328. <https://doi.org/10.1073/pnas.95.9.5323>
- 1249 Markram, H., Muller, E., Ramaswamy, S., Reimann, M. W., Abdellah, M., Sanchez, C. A., Ailamaki,  
1250 A., Alonso-Nanclares, L., Antille, N., Arsever, S., Kahou, G. A. A., Berger, T. K., Bilgili, A.,  
1251 Buncic, N., Chalimourda, A., Chindemi, G., Courcol, J.-D., Delalondre, F., Delattre, V., ...  
1252 Gidon, A. (2015). Reconstruction and simulation of neocortical microcircuitry. *Cell*, 163(2),  
1253 456–492. <https://doi.org/10.1016/j.cell.2015.09.029>
- 1254 McQuiston, A. R., & Madison, D. V. (1999). Muscarinic receptor activity has multiple effects on the  
1255 resting membrane potentials of CA1 hippocampal interneurons. *The Journal of Neuroscience*,  
1256 19(14), 5693–5702. <https://doi.org/10.1523/JNEUROSCI.19-14-05693.1999>
- 1257 Megias, M., Emri, Z., Freund, T., & Gulyas, A. (2001). Total number and distribution of inhibitory  
1258 and excitatory synapses on hippocampal CA1 pyramidal cells. *Neuroscience*, 102(3), 527–540.  
1259 [https://doi.org/10.1016/S0306-4522\(00\)00496-6](https://doi.org/10.1016/S0306-4522(00)00496-6)
- 1260 Mercer, A. (2012). Electrically coupled excitatory neurones in cortical regions. *Brain Res.*, 1487, 192–  
1261 197. <https://doi.org/10.1016/j.brainres.2012.03.069>
- 1262 Mercer, A., Bannister, A. P., & Thomson, A. M. (2006). Electrical coupling between pyramidal cells in  
1263 adult cortical regions. *Brain Cell Biol.*, 35(1), 13–27. [https://doi.org/10.1007/s11068-006-](https://doi.org/10.1007/s11068-006-9005-9)  
1264 9005-9
- 1265 Migliore, M., Hoffman, D. A., Magee, J. C., & Johnston, D. (1999). Role of an a-type k<sup>+</sup> conductance  
1266 in the back-propagation of action potentials in the dendrites of hippocampal pyramidal neurons.  
1267 *Journal of Computational Neuroscience*, 7(1), 5–15. <https://doi.org/10.1023/a:1008906225285>
- 1268 Migliore, M., Ferrante, M., & Ascoli, G. A. (2005). Signal propagation in oblique dendrites of CA1  
1269 pyramidal cells. *J. Neurophysiol.*, 94(6), 4145–4155. <https://doi.org/10.1152/jn.00521.2005>
- 1270 Migliore, R., Lupascu, C. A., Bologna, L. L., Romani, A., Courcol, J.-D., Antonel, S., Van Geit, W. A. H.,  
1271 Thomson, A. M., Mercer, A., Lange, S., Falck, J., Rössert, C. A., Shi, Y., Hagens, O., Pezzoli, M.,  
1272 Freund, T. F., Kali, S., Muller, E. B., Schürmann, F., ... Migliore, M. (2018). The physiological  
1273 variability of channel density in hippocampal CA1 pyramidal cells and interneurons explored using  
1274 a unified data-driven modeling workflow (W. W. Lytton, Ed.). *PLOS Computational Biology*,  
1275 14(9), e1006423. <https://doi.org/10.1371/journal.pcbi.1006423>



- 1276 Milstein, A. D., Bloss, E. B., Apostolides, P. F., Vaidya, S. P., Dilly, G. A., Zemelman, B. V., & Magee,  
1277 J. C. (2015). Inhibitory gating of input comparison in the CA1 microcircuit. *Neuron*, *87*(6),  
1278 1274–1289. <https://doi.org/10.1016/j.neuron.2015.08.025>
- 1279 Mizuseki, K., Diba, K., Pastalkova, E., & Buzsáki, G. (2011). Hippocampal CA1 pyramidal cells form  
1280 functionally distinct sublayers. *Nature Neuroscience*, *14*(9), 1174–1181. [https://doi.org/10.](https://doi.org/10.1038/nn.2894)  
1281 [1038/nn.2894](https://doi.org/10.1038/nn.2894)
- 1282 Moradi, K., & Ascoli, G. A. (2020). A comprehensive knowledge base of synaptic electrophysiology in  
1283 the rodent hippocampal formation. *Hippocampus*, *30*(4), 314–331. [https://doi.org/10.1002/](https://doi.org/10.1002/hipo.23148)  
1284 [hipo.23148](https://doi.org/10.1002/hipo.23148)
- 1285 Morris, R. G., Garrud, P., Rawlins, J. N., & O'Keefe, J. (1982). Place navigation impaired in rats with  
1286 hippocampal lesions. *Nature*, *297*(5868), 681–683. <https://doi.org/10.1038/297681a0>
- 1287 Morse, T. M., Carnevale, N. T., Mutalik, P. G., Migliore, M., & Shepherd, G. M. (2010). Abnormal  
1288 excitability of oblique dendrites implicated in early alzheimer's: A computational study. *Frontiers*  
1289 *in Neural Circuits*, *4*, 16. <https://doi.org/10.3389/fncir.2010.00016>
- 1290 Müller, C., & Remy, S. (2018). Septo-hippocampal interaction. *Cell and Tissue Research*, *373*(3), 565–  
1291 575. <https://doi.org/10.1007/s00441-017-2745-2>
- 1292 Neu, A., Földy, C., & Soltesz, I. (2007). Postsynaptic origin of CB1-dependent tonic inhibition of GABA  
1293 release at cholecystokinin-positive basket cell to pyramidal cell synapses in the CA1 region of the  
1294 rat hippocampus. *The Journal of Physiology*, *578*, 233–247. [https://doi.org/10.1113/jphysiol.](https://doi.org/10.1113/jphysiol.2006.115691)  
1295 [2006.115691](https://doi.org/10.1113/jphysiol.2006.115691)
- 1296 Newton, T. H., Reimann, M. W., Abdellah, M., Chevtchenko, G., Muller, E. B., & Markram, H. (2021).  
1297 In silico voltage-sensitive dye imaging reveals the emergent dynamics of cortical populations.  
1298 *Nature Communications*, *12*(1), 3630. <https://doi.org/10.1038/s41467-021-23901-7>
- 1299 O'Keefe, J., & Dostrovsky, J. (1971). The hippocampus as a spatial map. preliminary evidence from unit  
1300 activity in the freely-moving rat. *Brain Res.*, *34*(1), 171–175. [https://doi.org/10.1016/0006-](https://doi.org/10.1016/0006-8993(71)90358-1)  
1301 [8993\(71\)90358-1](https://doi.org/10.1016/0006-8993(71)90358-1)
- 1302 Palacios, J., Lida Kanari, Zisis, E., MikeG, Benoit Coste, Asanin-Epfl, Vanherpe, L., Jdcourcol, Arnaudon,  
1303 A., Berchet, A., Haleepfl, Getta, P., Povolotsky, A. V., A Sato, Alex4200, Bbpgithubaudit, Fi-  
1304 carelli, G., Amsalem, O., Stefanoantonel, & Tomdele. (2022). Bluebrain/neurom: V3.2.2. <https://doi.org/10.5281/ZENODO.597333>
- 1305 [//doi.org/10.5281/ZENODO.597333](https://doi.org/10.5281/ZENODO.597333)
- 1306 Palacios-Filardo, J., Udakis, M., Brown, G. A., Tehan, B. G., Congreve, M. S., Nathan, P. J., Brown,  
1307 A. J. H., & Mellor, J. R. (2021). Acetylcholine prioritises direct synaptic inputs from entorhinal  
1308 cortex to CA1 by differential modulation of feedforward inhibitory circuits. *Nature Communica-*  
1309 *tions*, *12*(1), 5475. <https://doi.org/10.1038/s41467-021-25280-5>
- 1310 Papatheodoropoulos, C. (2015). Striking differences in synaptic facilitation along the dorsoventral axis  
1311 of the hippocampus. *Neuroscience*, *301*, 454–470. [https://doi.org/10.1016/j.neuroscience.](https://doi.org/10.1016/j.neuroscience.2015.06.029)  
1312 [2015.06.029](https://doi.org/10.1016/j.neuroscience.2015.06.029)
- 1313 Pawelzik, H., Bannister, A. P., Deuchars, J., Ilia, M., & Thomson, A. M. (1999). Modulation of bistratified  
1314 cell IPSPs and basket cell IPSPs by pentobarbitone sodium, diazepam and zn<sup>2+</sup>: Dual recordings  
1315 in slices of adult rat hippocampus. *European Journal of Neuroscience*, *13*.
- 1316 Pawelzik, H., Hughes, D. I., & Thomson, A. M. (2002). Physiological and morphological diversity of  
1317 immunocytochemically defined parvalbumin- and cholecystokinin-positive interneurons in CA1

- 1318 of the adult rat hippocampus. *The Journal of Comparative Neurology*, 443(4), 346–367. <https://doi.org/10.1002/cne.10118>
- 1319
- 1320 Pelkey, K. A., Chittajallu, R., Craig, M. T., Tricoire, L., Wester, J. C., & McBain, C. J. (2017).  
1321 Hippocampal GABAergic inhibitory interneurons. *Physiol. Rev.*, 97(4), 1619–1747. <https://doi.org/10.1152/physrev.00007.2017>
- 1322
- 1323 Petilla Interneuron Nomenclature Group, Ascoli, G. A., Alonso-Nanclares, L., Anderson, S. A., Bar-  
1324 rionuevo, G., Benavides-Piccione, R., Burkhalter, A., Buzsáki, G., Cauli, B., Defelipe, J., Fairén,  
1325 A., Feldmeyer, D., Fishell, G., Fregnac, Y., Freund, T. F., Gardner, D., Gardner, E. P., Goldberg,  
1326 J. H., Helmstaedter, M., ... Yuste, R. (2008). Petilla terminology: Nomenclature of features  
1327 of GABAergic interneurons of the cerebral cortex. *Nat. Rev. Neurosci.*, 9(7), 557–568. <https://doi.org/10.1038/nrn2402>
- 1328
- 1329 Pietersen, A. N. J., Ward, P. D., Hagger-Vaughan, N., Wiggins, J., Jefferys, J. G. R., & Vreugdenhil, M.  
1330 (2014). Transition between fast and slow gamma modes in rat hippocampus area CA1 in vitro  
1331 is modulated by slow CA3 gamma oscillations. *The Journal of Physiology*, 592(4), 605–620.  
1332 <https://doi.org/10.1113/jphysiol.2013.263889>
- 1333 Potworowski, J., Jakuczun, W., Leski, S., & Wojcik, D. (2012). Kernel current source density method.  
1334 *Neural Comput.*, 24(2), 541–575. [https://doi.org/10.1162/NECO\\_a\\_00236](https://doi.org/10.1162/NECO_a_00236)
- 1335 Pouille, F., & Scanziani, M. (2001). Enforcement of temporal fidelity in pyramidal cells by somatic  
1336 feed-forward inhibition. *Science (New York, N.Y.)*, 293(5532), 1159–1163. <https://doi.org/10.1126/science.1060342>
- 1337
- 1338 Pouille, F., Marin-Burgin, A., Adesnik, H., Atallah, B. V., & Scanziani, M. (2009). Input normalization  
1339 by global feedforward inhibition expands cortical dynamic range. *Nature Neuroscience*, 12(12),  
1340 1577–1585. <https://doi.org/10.1038/nn.2441>
- 1341 Prieto, G. A., Parker, R. L., & Vernon, F. L., III. (2009). A fortran 90 library for multitaper spectrum  
1342 analysis. *Comput. Geosci.*, 35(8), 1701–1710. <https://doi.org/10.1016/j.cageo.2008.06.007>
- 1343 Ramaswamy, S., Colangelo, C., & Markram, H. (2018). Data-driven modeling of cholinergic modulation  
1344 of neural microcircuits: Bridging neurons, synapses and network activity. *Frontiers in Neural*  
1345 *Circuits*, 12, 77. <https://doi.org/10.3389/fncir.2018.00077>
- 1346 Reimann, M. W., Anastassiou, C. A., Perin, R., Hill, S. L., Markram, H., & Koch, C. (2013). A bio-  
1347 physically detailed model of neocortical local field potentials predicts the critical role of active  
1348 membrane currents. *Neuron*, 79(2), 375–390. <https://doi.org/10.1016/j.neuron.2013.05.023>
- 1349 Reimann, M. W., Bolaños-Puchet, S., Courcol, J.-D., Santander, D. E., Arnaudon, A., Coste, B., Dele-  
1350 montex, T., Devresse, A., Dictus, H., Dietz, A., Ecker, A., Favreau, C., Ficarelli, G., Gevaert,  
1351 M., Hernando, J. B., Herttuainen, J., Isbister, J. B., Kanari, L., Keller, D., ... Markram, H.  
1352 (2022). Modeling and Simulation of Rat Non-Barrel Somatosensory Cortex. Part I: Modeling  
1353 Anatomy. *bioRxiv*, 2022.08.11.503144. <https://doi.org/10.1101/2022.08.11.503144>
- 1354 Reimann, M. W., King, J. G., Muller, E. B., Ramaswamy, S., & Markram, H. (2015). An algorithm  
1355 to predict the connectome of neural microcircuits. *Frontiers in Computational Neuroscience*, 9.  
1356 <https://doi.org/10.3389/fncom.2015.00120>
- 1357 Rockström, J., Steffen, W., Noone, K., Persson, Å., Chapin, F. S., Lambin, E. F., Lenton, T. M., Scheffer,  
1358 M., Folke, C., Schellnhuber, H. J., Nykvist, B., de Wit, C. A., Hughes, T., van der Leeuw, S.,

- 1359 Rodhe, H., Sörlin, S., Snyder, P. K., Costanza, R., Svedin, U., ... Foley, J. A. (2009). A safe  
1360 operating space for humanity. *Nature*, *461*(7263), 472–475. <https://doi.org/10.1038/461472a>
- 1361 Romani, A., Schürmann, F., Markram, H., & Migliore, M. (2022). Reconstruction of the hippocampus.  
1362 *Advances in Experimental Medicine and Biology*, *1359*, 261–283. [https://doi.org/10.1007/978-3-030-89439-9\\_11](https://doi.org/10.1007/978-3-030-89439-9_11)
- 1363
- 1364 Ropireddy, D., Bachus, S., & Ascoli, G. (2012). Non-homogeneous stereological properties of the rat  
1365 hippocampus from high-resolution 3d serial reconstruction of thin histological sections. *Neuro-*  
1366 *science*, *205*, 91–111. <https://doi.org/10.1016/j.neuroscience.2011.12.055>
- 1367 Sanchez-Aguilera, A., Wheeler, D. W., Jurado-Parras, T., Valero, M., Nokia, M. S., Cid, E., Fernandez-  
1368 Lamo, I., Sutton, N., Garcia-Rincon, D., de la Prida, L. M., & Ascoli, G. A. (2021). An update  
1369 to hippocampome.org by integrating single-cell phenotypes with circuit function in vivo. *PLoS*  
1370 *biology*, *19*(5), e3001213. <https://doi.org/10.1371/journal.pbio.3001213>
- 1371 Sáray, S., Rössert, C. A., Appukuttan, S., Migliore, R., Vitale, P., Lupascu, C. A., Bologna, L. L., Van  
1372 Geit, W., Romani, A., Davison, A. P., Muller, E., Freund, T. F., & Káli, S. (2021). HippoUnit:  
1373 A software tool for the automated testing and systematic comparison of detailed models of  
1374 hippocampal neurons based on electrophysiological data. *PLoS Comput. Biol.*, *17*(1), e1008114.  
1375 <https://doi.org/10.1371/journal.pcbi.1008114>
- 1376 Sasaki, T., Kimura, R., Tsukamoto, M., Matsuki, N., & Ikegaya, Y. (2006). Integrative spike dynamics  
1377 of rat CA1 neurons: A multineuronal imaging study. *The Journal of Physiology*, *574*, 195–208.  
1378 <https://doi.org/10.1113/jphysiol.2006.108480>
- 1379 Sayer, R. J., Friedlander, M. J., & Redman, S. J. (1990). The time course and amplitude of EPSPs  
1380 evoked at synapses between pairs of CA3/CA1 neurons in the hippocampal slice. *The Journal*  
1381 *of Neuroscience: The Official Journal of the Society for Neuroscience*, *10*(3), 826–836.
- 1382 Sevilla, D. F., Cabezas, C., Prada, A. N. O., Sánchez-Jiménez, A., & Buño, W. (2002). Selective mus-  
1383 carinic regulation of functional glutamatergic schaffer collateral synapses in rat CA1 pyramidal  
1384 neurons. *The Journal of Physiology*, *545*(1), 51–63. <https://doi.org/10.1113/jphysiol.2002.029165>
- 1385
- 1386 Shah, M. M., Migliore, M., Valencia, I., Cooper, E. C., & Brown, D. A. (2008). Functional significance  
1387 of axonal kv7 channels in hippocampal pyramidal neurons. *Proc. Natl. Acad. Sci. U. S. A.*,  
1388 *105*(22), 7869–7874. <https://doi.org/10.1073/pnas.0802805105>
- 1389 Sheridan, R. D., & Sutor, B. (1990). Presynaptic m1 muscarinic cholinceptors mediate inhibition of  
1390 excitatory synaptic transmission in the hippocampus in vitro. *Neuroscience Letters*, *108*(3),  
1391 273–278. [https://doi.org/10.1016/0304-3940\(90\)90653-Q](https://doi.org/10.1016/0304-3940(90)90653-Q)
- 1392 Siapas, A. G., Lubenov, E. V., & Wilson, M. A. (2005). Prefrontal phase locking to hippocampal theta  
1393 oscillations. *Neuron*, *46*(1), 141–151. <https://doi.org/10.1016/j.neuron.2005.02.028>
- 1394 Sik, A., Penttonen, M., Ylinen, A., & Buzsáki, G. (1995). Hippocampal CA1 interneurons: An in vivo  
1395 intracellular labeling study. *The Journal of Neuroscience*, *15*(10), 6651–6665. <https://doi.org/10.1523/JNEUROSCI.15-10-06651.1995>
- 1396
- 1397 Sik, A., Tamamaki, N., & Freund, T. F. (1993). Complete axon arborization of a single CA3 pyramidal cell  
1398 in the rat hippocampus, and its relationship with postsynaptic parvalbumin-containing interneu-  
1399 rons. *European Journal of Neuroscience*, *5*(12), 1719–1728. <https://doi.org/10.1111/j.1460-9568.1993.tb00239.x>
- 1400

- 1401 Sirota, A., Montgomery, S., Fujisawa, S., Isomura, Y., Zugaro, M., & Buzsáki, G. (2008). Entrainment  
1402 of neocortical neurons and gamma oscillations by the hippocampal theta rhythm. *Neuron*, *60*(4),  
1403 683–697. <https://doi.org/10.1016/j.neuron.2008.09.014>
- 1404 Slomianka, L., Amrein, I., Knuesel, I., Sørensen, J. C., & Wolfer, D. P. (2011). Hippocampal pyramidal  
1405 cells: The reemergence of cortical lamination. *Brain Structure & Function*, *216*(4), 301–317.  
1406 <https://doi.org/10.1007/s00429-011-0322-0>
- 1407 Sniedovich, M. (2006). Dijkstra's algorithm revisited: The dynamic programming connexion. *Control*  
1408 *and Cybernetics*, 599–620. Retrieved August 2, 2022, from [https://www.infona.pl//resource/  
1409 bwmeta1.element.baztech-article-BAT5-0013-0005](https://www.infona.pl//resource/bwmeta1.element.baztech-article-BAT5-0013-0005)
- 1410 Soltesz, I., & Losonczy, A. (2018). CA1 pyramidal cell diversity enabling parallel information processing  
1411 in the hippocampus [Number: 4 Publisher: Nature Publishing Group]. *Nature Neuroscience*,  
1412 *21*(4), 484–493. <https://doi.org/10.1038/s41593-018-0118-0>
- 1413 Sun, Y., Nguyen, A. Q., Nguyen, J. P., Le, L., Saur, D., Choi, J., Callaway, E. M., & Xu, X. (2014).  
1414 Cell-type-specific circuit connectivity of hippocampal CA1 revealed through cre-dependent rabies  
1415 tracing. *Cell Reports*, *7*(1), 269–280. <https://doi.org/10.1016/j.celrep.2014.02.030>
- 1416 Sutton, N. M., & Ascoli, G. A. (2021). Spiking neural networks and hippocampal function: A web-  
1417 accessible survey of simulations, modeling methods, and underlying theories. *Cognitive Systems*  
1418 *Research*, *70*, 80–92. <https://doi.org/10.1016/j.cogsys.2021.07.008>
- 1419 Szabó, G. G., Holderith, N., Gulyás, A. I., Freund, T. F., & Hájos, N. (2010). Distinct synaptic properties  
1420 of perisomatic inhibitory cell types and their different modulation by cholinergic receptor activa-  
1421 tion in the CA3 region of the mouse hippocampus: Synaptic properties of perisomatic interneu-  
1422 rons. *European Journal of Neuroscience*, *31*(12), 2234–2246. [https://doi.org/10.1111/j.1460-  
1423 9568.2010.07292.x](https://doi.org/10.1111/j.1460-9568.2010.07292.x)
- 1424 Szigeti, B., Gleeson, P., Vella, M., Khayrulin, S., Palyanov, A., Hokanson, J., Currie, M., Cantarelli, M.,  
1425 Idili, G., & Larson, S. (2014). OpenWorm: An open-science approach to modeling caenorhabditis  
1426 elegans. *Front. Comput. Neurosci.*, *8*, 137. <https://doi.org/10.3389/fncom.2014.00137>
- 1427 Szirmai, I., Buzsáki, G., & Kamondi, A. (2012). 120 years of hippocampal schaffer collaterals. *Hip-*  
1428 *pocampus*, *22*(7), 1508–1516. <https://doi.org/10.1002/hipo.22001>
- 1429 Takács, V. T., Klausberger, T., Somogyi, P., Freund, T. F., & Gulyás, A. I. (2012). Extrinsic and local  
1430 glutamatergic inputs of the rat hippocampal CA1 area differentially innervate pyramidal cells  
1431 and interneurons. *Hippocampus*, *22*(6), 1379–1391. <https://doi.org/10.1002/hipo.20974>
- 1432 Tao, S., Wang, Y., Peng, J., Zhao, Y., He, X., Yu, X., Liu, Q., Jin, S., & Xu, F. (2021). Whole-Brain  
1433 mapping the direct inputs of dorsal and ventral CA1 projection neurons. *Front. Neural Circuits*,  
1434 *15*, 643230. <https://doi.org/10.3389/fncir.2021.643230>
- 1435 Teles-Grilo Ruivo, L. M., & Mellor, J. R. (2013). Cholinergic modulation of hippocampal network func-  
1436 tion. *Front. Synaptic Neurosci.*, *5*, 2. <https://doi.org/10.3389/fnsyn.2013.00002>
- 1437 Thomson, A. M., Bannister, A. P., Hughes, D. I., & Pawelzik, H. (2000). Differential sensitivity to  
1438 zolpidem of IPSPs activated by morphologically identified CA1 interneurons in slices of rat  
1439 hippocampus: Zolpidem enhancement of basket cell IPSPs in CA1. *European Journal of Neuro-*  
1440 *science*, *12*(2), 425–436. <https://doi.org/10.1046/j.1460-9568.2000.00915.x>

- 1441 Traub, R. D., Bibbig, A., Fisahn, A., LeBeau, F. E., Whittington, M. A., & Buhl, E. H. (2000). A model  
1442 of gamma-frequency network oscillations induced in the rat CA3 region by carbachol in vitro.  
1443 *Eur. J. Neurosci.*, *12*(11), 4093–4106. <https://doi.org/10.1046/j.1460-9568.2000.00300.x>
- 1444 Traub, R. D., Miles, R., & Buzsáki, G. (1992). Computer simulation of carbachol-driven rhythmic  
1445 population oscillations in the CA3 region of the in vitro rat hippocampus. *J. Physiol.* <https://doi.org/10.1113/jphysiol.1992.sp019184>
- 1447 Traub, R. D., Miles, R., & Wong, R. S. (1988). Large scale simulations of the hippocampus. *IEEE Eng.*  
1448 *Med. Biol. Mag.*, *7*(4), 31–38. <https://doi.org/10.1109/51.20378>
- 1449 Traub, R. D., & Miles, R. (1991). *Neuronal networks of the hippocampus*. Cambridge University Press.  
1450 <https://doi.org/10.1017/cbo9780511895401>
- 1451 Tsodyks, M., & Markram, H. (1997). The neural code between neocortical pyramidal neurons depends on  
1452 neurotransmitter release probability. *Proceedings of the National Academy of Sciences*, *94*(2),  
1453 719–723. <https://doi.org/10.1073/pnas.94.2.719>
- 1454 Van Geit, W., Gevaert, M., Chindemi, G., Rössert, C., Courcol, J.-D., Muller, E. B., Schürmann, F.,  
1455 Segev, I., & Markram, H. (2016). BluePyOpt: Leveraging open source software and cloud in-  
1456 frastructure to optimise model parameters in neuroscience. *Front. Neuroinform.*, *10*, 17. <https://doi.org/10.3389/fninf.2016.00017>
- 1458 Vandecasteele, M., Varga, V., Berényi, A., Papp, E., Barthó, P., Venance, L., Freund, T. F., & Buzsáki,  
1459 G. (2014). Optogenetic activation of septal cholinergic neurons suppresses sharp wave ripples  
1460 and enhances theta oscillations in the hippocampus. *Proceedings of the National Academy of*  
1461 *Sciences*, *111*(37), 13535–13540. <https://doi.org/10.1073/pnas.1411233111>
- 1462 Vanderwolf, C. H. (1969). Hippocampal electrical activity and voluntary movement in the rat. *Electroen-*  
1463 *cephalogr. Clin. Neurophysiol.*, *26*(4), 407–418. [https://doi.org/10.1016/0013-4694\(69\)90092-](https://doi.org/10.1016/0013-4694(69)90092-3)  
1464 3
- 1465 Vida, I., Halasy, K., Szinyei, C., Somogyi, P., & Buhl, E. H. (1998). Unitary IPSPs evoked by interneu-  
1466 rons at the stratum radiatum-stratum lacunosum-moleculare border in the CA1 area of the rat  
1467 hippocampus in vitro. *The Journal of Physiology*, *506*(3), 755–773. [https://doi.org/10.1111/j.](https://doi.org/10.1111/j.1469-7793.1998.755bv.x)  
1468 1469-7793.1998.755bv.x
- 1469 Wang, Q., Ding, S.-L., Li, Y., Royall, J., Feng, D., Lesnar, P., Graddis, N., Naemi, M., Facer, B., Ho, A.,  
1470 Dolbeare, T., Blanchard, B., Dee, N., Wakeman, W., Hirokawa, K. E., Szafer, A., Sunkin, S. M.,  
1471 Oh, S. W., Bernard, A., . . . Ng, L. (2020). The allen mouse brain common coordinate framework:  
1472 A 3D reference atlas. *Cell*, *181*(4), 936–953.e20. <https://doi.org/10.1016/j.cell.2020.04.007>
- 1473 Wheeler, D. W., White, C. M., Rees, C. L., Komendantov, A. O., Hamilton, D. J., & Ascoli, G. A.  
1474 (2015). Hippocampome.org: A knowledge base of neuron types in the rodent hippocampus  
1475 (F. K. Skinner, Ed.) [Publisher: eLife Sciences Publications, Ltd]. *eLife*, *4*, e09960. [https://doi.](https://doi.org/10.7554/eLife.09960)  
1476 org/10.7554/eLife.09960
- 1477 Wierenga, C. J., & Wadman, W. J. (2003). Excitatory inputs to CA1 interneurons show selective synaptic  
1478 dynamics. *Journal of Neurophysiology*, *90*(2), 811–821. <https://doi.org/10.1152/jn.00865.2002>
- 1479 Wilkie, D. (1983). Rayleigh test for randomness of circular data. *J. R. Stat. Soc. Ser. C Appl. Stat.*,  
1480 *32*(3), 311. <https://doi.org/10.2307/2347954>



- 1481 Williams, J. H., & Kauer, J. A. (1997). Properties of carbachol-induced oscillatory activity in rat hip-  
1482 pocampus. *Journal of Neurophysiology*, *78*(5), 2631–2640. [https://doi.org/10.1152/jn.1997.](https://doi.org/10.1152/jn.1997.78.5.2631)  
1483 78.5.2631
- 1484 Williams, S., & Johnston, D. (1990). Muscarinic depression of synaptic transmission at the hippocampal  
1485 mossy fiber synapse. *Journal of Neurophysiology*, *64*(4), 1089–1097. [https://doi.org/10.1152/](https://doi.org/10.1152/jn.1990.64.4.1089)  
1486 [jn.1990.64.4.1089](https://doi.org/10.1152/jn.1990.64.4.1089)
- 1487 Wittner, L., Henze, D. A., Záborszky, L., & Buzsáki, G. (2007). Three-dimensional reconstruction of  
1488 the axon arbor of a CA3 pyramidal cell recorded and filled in vivo. *Brain Structure and Function*,  
1489 *212*(1), 75–83. <https://doi.org/10.1007/s00429-007-0148-y>
- 1490 Yang, D., Ding, C., Qi, G., & Feldmeyer, D. (2021). Cholinergic and adenosinergic modulation of synaptic  
1491 release. *Neuroscience*, *456*, 114–130. <https://doi.org/10.1016/j.neuroscience.2020.06.006>
- 1492 Yang, S., Yang, S., Moreira, T., Hoffman, G., Carlson, G. C., Bender, K. J., Alger, B. E., & Tang, C.-M.  
1493 (2014). Interlamellar CA1 network in the hippocampus. *Proceedings of the National Academy*  
1494 *of Sciences of the United States of America*, *111*(35), 12919–12924. [https://doi.org/10.1073/](https://doi.org/10.1073/pnas.1405468111)  
1495 [pnas.1405468111](https://doi.org/10.1073/pnas.1405468111)
- 1496 Ylinen, A., Soltész, I., Bragin, A., Penttonen, M., Sik, A., & Buzsáki, G. (1995). Intracellular corre-  
1497 lates of hippocampal theta rhythm in identified pyramidal cells, granule cells, and basket cells.  
1498 *Hippocampus*, *5*(1), 78–90. <https://doi.org/10.1002/hipo.450050110>
- 1499 Yu, G. J., Bouteiller, J.-M. C., & Berger, T. W. (2020). Topographic organization of correlation along  
1500 the longitudinal and transverse axes in rat hippocampal CA3 due to excitatory afferents. *Front.*  
1501 *Comput. Neurosci.*, *14*, 588881. <https://doi.org/10.3389/fncom.2020.588881>
- 1502 Yushkevich, P. A., Piven, J., Cody Hazlett, H., Gimpel Smith, R., Ho, S., Gee, J. C., & Gerig, G. (2006).  
1503 User-guided 3D active contour segmentation of anatomical structures: Significantly improved  
1504 efficiency and reliability. *Neuroimage*, *31*(3), 1116–1128.
- 1505 Zemankovics, R., Veres, J. M., Oren, I., & Hajos, N. (2013). Feedforward inhibition underlies the prop-  
1506 agation of cholinergically induced gamma oscillations from hippocampal CA3 to CA1. *Journal*  
1507 *of Neuroscience*, *33*(30), 12337–12351. <https://doi.org/10.1523/JNEUROSCI.3680-12.2013>
- 1508 Zhang, H., Lin, S.-C., & Nicolelis, M. A. L. (2010). Spatiotemporal coupling between hippocampal  
1509 acetylcholine release and theta oscillations in vivo. *The Journal of Neuroscience*, *30*(40), 13431–  
1510 13440. <https://doi.org/10.1523/jneurosci.1144-10.2010>
- 1511 Zisis, E., Keller, D., Kanari, L., Arnaudon, A., Gevaert, M., Delemontex, T., Coste, B., Foni, A., Ab-  
1512 dellah, M., Cali, C., Hess, K., Magistretti, P. J., Schürmann, F., & Markram, H. (2021). Dig-  
1513 ital reconstruction of the Neuro-Glia-Vascular architecture. *Cereb. Cortex*, *31*(12), 5686–5703.  
1514 <https://doi.org/10.1093/cercor/bhab254>
