# Community-based Reconstruction and Simulation of a Full-scale Model of Region CA1 of Rat Hippocampus

Armando Romani<sup>1,+</sup>, Alberto Antonietti<sup>1</sup>, Davide Bella<sup>1</sup>, Julian Budd<sup>1,3</sup>, Elisabetta Giacalone<sup>2</sup>, Kerem Kurban<sup>1</sup>, Sára Sáray<sup>3,4</sup>, Marwan Abdellah<sup>1</sup>, Alexis Arnaudon<sup>1</sup>, Elvis Boci<sup>1</sup>, Cristina Colangelo<sup>1</sup>, Jean-Denis Courcol<sup>1</sup>, Thomas Delemontex<sup>1</sup>, András Ecker<sup>1</sup>, Joanne Falck<sup>5</sup>, Cyrille Favreau<sup>1</sup>, Michael Gevaert<sup>1</sup>, Juan B. Hernando<sup>1</sup>, Joni Herttuainen<sup>1</sup>, Genrich Ivaska<sup>1</sup>, Lida Kanari<sup>1</sup>, Anna-Kristin Kaufmann<sup>1</sup>, James Gonzalo King<sup>1</sup>, Pramod Kumbhar<sup>1</sup>, Sigrun Lange<sup>5,6</sup>, Huanxiang Lu<sup>1</sup>, Carmen Alina Lupascu<sup>2</sup>, Rosanna Migliore<sup>2</sup>, Fabien Petitjean<sup>1</sup>, Judit Planas<sup>1</sup>, Pranav Rai<sup>1</sup>, Srikanth Ramaswamy<sup>1</sup>, Michael W. Reimann<sup>1</sup>, Juan Luis Riquelme<sup>1</sup>, Nadir Román Guerrero<sup>1</sup>, Ying Shi<sup>1</sup>, Vishal Sood<sup>1</sup>, Mohameth François Sy<sup>1</sup>, Werner Van Geit<sup>1</sup>, Liesbeth Vanherpe<sup>1</sup>, Tamás F. Freund<sup>3,4,\*</sup>, Audrey Mercer<sup>5,\*</sup>, Eilif Müller<sup>1,\*</sup>, Felix Schürmann<sup>1,\*</sup>, Alex M. Thomson<sup>5,\*</sup>, Michele Migliore<sup>2,\*,+</sup>, Szabolcs Káli<sup>3,4,\*,+</sup>, and Henry Markram<sup>1,\*,+</sup>

<sup>1</sup>Blue Brain Project, École polytechnique fédérale de Lausanne (EPFL), Campus Biotech, Geneva, Switzerland

<sup>2</sup>Institute of Biophysics, National Research Council (CNR), Palermo, Italy

<sup>3</sup>Institute of Experimental Medicine (KOKI), Eötvös Loránd Research Network, Budapest, Hungary

<sup>4</sup>Faculty of Information Technology and Bionics, Pázmány Péter Catholic University, Budapest, Hungary

<sup>5</sup>UCL School of Pharmacy, University College London (UCL), London, UK

<sup>6</sup>School of Life Sciences, University of Westminster, London, UK

\*Co-senior authors

+Corresponding authors

January 13, 2024

## 21 **Abstract**

22 The CA1 region of the hippocampus is one of the most studied regions of the rodent brain, thought to  
23 play an important role in cognitive functions such as memory and spatial navigation. Despite a wealth of  
24 experimental data on its structure and function, it has been challenging to reconcile information obtained  
25 from diverse experimental approaches. To address this challenge, we present a community-driven, full-  
26 scale *in silico* model of the rat CA1 that integrates a broad range of experimental data, from synapse  
27 to network, including the reconstruction of its principal afferents, the Schaffer collaterals, and a model  
28 of the effects that acetylcholine has on the system. We tested and validated each model component  
29 and the final network model, and made input data, assumptions, and strategies explicit and transparent.  
30 The unique flexibility of the model allows scientists to address a range of scientific questions. In this  
31 article, we describe the methods used to set up simulations that reproduce and extend *in vitro* and *in*  
32 *vivo* experiments. Among several applications in the article, we focus on theta rhythm, a prominent  
33 hippocampal oscillation associated with various behavioral correlates and use our computer model to  
34 reproduce and reconcile experimental findings. Finally, we make data, code and model available through  
35 the hippocampushub.eu portal, which also provides an extensive set of analyses of the model and a user-  
36 friendly interface to facilitate adoption and usage. This neuroscience community-driven model represents  
37 a valuable tool for integrating diverse experimental data and provides a foundation for further research  
38 into the complex workings of the hippocampal CA1 region.

## 39 **Keywords**

40 hippocampus, CA1, neuroscience community, large-scale compartmental modeling, data-driven.

## 41 1 Introduction

42 The hippocampus is thought to play a fundamental role in cognitive functions such as learning, memory,  
43 and spatial navigation (O'Keefe & Dostrovsky, 1971; Morris et al., 1982). It consists of three subfields  
44 of *cornu ammonis* (CA), CA1, CA2, and CA3 (see Amaral and Witter, 1989). CA1, for instance, one  
45 of the most studied, provides the major hippocampal output to the neocortex and many other brain  
46 regions (e.g. Soltesz and Losonczy, 2018). Therefore, understanding the function of CA1 represents a  
47 significant step towards explaining the role of hippocampus in cognition.

48 Each year the large neuroscientific community studying hippocampus contributes thousands of papers  
49 to an existing mass of empirical data collected over many decades of research (see Figure S1). Recent  
50 reviews have, however, highlighted gaps and inconsistencies in the existing literature (Bezaire & Soltesz,  
51 2013; Wheeler et al., 2015; Pelkey et al., 2017; Sanchez-Aguilera et al., 2021). Currently, the community  
52 lacks a unifying, multiscale model of hippocampal structure and function with which to integrate new  
53 and existing data.

54 Computational models and simulations have emerged as crucial tools in neuroscience for consolidating  
55 diverse multiscale data into unified, consistent, and quantitative frameworks that can be used to validate  
56 and predict dynamic behavior (Fan & Markram, 2019). However, constructing such models requires  
57 assigning values to model parameters, which often involves resolving conflicts in the data, filling gaps  
58 in knowledge, and making explicit assumptions to compensate for any incomplete data. In order to  
59 validate the model, it must be tested under specific experimental conditions using independent sources  
60 of empirical evidence before the model can be used to generate experimentally testable predictions.  
61 Therefore, the curation of a vast range of experimental data is a fundamental step in constructing and  
62 parametrizing any data-driven model of hippocampus.

63 The challenge of incorporating these data into a comprehensive reference model of hippocampus, how-  
64 ever, is considerable and calls for a community effort. While community-wide projects are common in  
65 other disciplines (e.g. Human Genome Project in bioinformatics, CERN in particle physics, NASA's  
66 Great Observatories program in astronomy - Rockström et al., 2009; Hood and Rowen, 2013; Aad and  
67 Abbott, 2015), they are a relatively recent development in neuroscience. OpenWorm, for example, is  
68 a successful, decade-long community project to create and simulate a realistic, data-driven reference  
69 model of the roundworm *Caenorhabditis elegans* (*C. elegans*) including its neural circuitry of ~302  
70 neurons to study the behavior of this relatively simple organism *in silico* (Szigeti et al., 2014; Gerkin  
71 et al., 2018). By contrast, for the hippocampus, with a circuit many orders of magnitude larger than  
72 *C. elegans*, models have typically been constructed with a minimal circuit structure on a relatively small  
73 scale and often their model parameters have been tuned with the goal of reproducing a single empirical  
74 phenomenon (see Sutton and Ascoli, 2021). Comparing the results from a variety of circuit models  
75 is problematic because they vary in their degree of realism and frequently rely on one or a few single  
76 neuron models making generalization of their findings difficult (see Sutton and Ascoli, 2021). While  
77 these focused models have led to valuable insights (see M. E. Hasselmo et al., 2020), this piecemeal  
78 approach fails to demonstrate whether these separate phenomena can be reproduced in a full circuit  
79 model without the need to adjust parameters.

80 Large-scale circuit models of hippocampus using realistic multi-compartment spiking neuronal models  
81 pioneered by Traub and colleagues (Traub et al., 1988; Traub & Miles, 1991; Traub et al., 1992, 2000)  
82 have been used to explain key characteristics of oscillatory activity observed in hippocampal slices and  
83 to examine the origins of epilepsy in region CA3. More recently, with significant increases in high-  
84 performance computing resources, Cutsuridis et al. (2010) in a microcircuit model of CA1 and notably  
85 Bezaire et al. (2016) in a full-scale CA1 model, have examined the contribution of diverse types of  
86 interneurons to the generation of prominent theta (4-12 Hz) oscillations. While these large-scale circuit  
87 models provide a more holistic approach, they still need to incorporate other features to improve their  
88 realism. For instance, to better reflect the highly curved shape of the hippocampus, an atlas-based  
89 structure that more closely mimics anatomy is required. Additionally, models need to employ pathway-  
90 specific short-term synaptic plasticity known to regulate circuit dynamics and neural coding (Tsodyks  
91 & Markram, 1997). While Yu et al. (2020) have constructed a down-scaled, atlas-based model of the  
92 rat dentate gyrus (DG) to CA3 pathway, there has to date been no atlas-based, full-scale model of rat  
93 CA1 (For a more detailed comparison of these models, see Table S2).

94 To initiate a community effort of this magnitude requires an approach that standardizes data curation  
95 and integration of diverse datasets from different labs and uses these curated data to construct and  
96 simulate a scalable and reproducible circuit automatically. A reconstruction and simulation methodology  
97 was introduced and applied at the microcircuit scale, for the neocortex (Markram et al., 2015) and the  
98 thalamus (Iavarone et al., 2023) and at full-scale for a whole neocortical area (Reimann et al., 2022;  
99 Isbister et al., 2023). However, these models relied primarily on datasets collected specifically for the  
100 purpose rather than data sought from and curated with the help of the scientific community.

101 In this paper, we describe a community-driven reconstruction and simulation of a full-scale, atlas-based  
102 multiscale structural and functional model of the area CA1 of the hippocampus that extends and im-  
103 proves upon the approach described in Markram et al. (2015). To model stimuli originating from beyond  
104 the intrinsic circuitry, we included the synaptic input from the Schaffer collaterals (SC) from CA3, which  
105 is the largest afferent pathway to CA1 and the most commonly stimulated in experiments. Furthermore,  
106 we also added the neuromodulatory influence of cholinergic inputs, perhaps the most studied neuromod-  
107 ulator in the hippocampus (Teles-Grilo Ruivo & Mellor, 2013). We constrained all model parameters and  
108 data using available experimental data from different labs or explicit assumptions made when data were  
109 lacking. We extensively tested and validated each model component and the final network to assess its  
110 quality. To maximize realism of the simulations, we set up simulation experiments to represent as closely  
111 as possible the experimental conditions of each empirical validation. We demonstrated the broad appli-  
112 cability of the model by studying the generation of neuronal oscillations, with a specific focus on theta  
113 rhythm, in response to a variety of different stimulus conditions. Over time and with the help of the  
114 community, limitations of the model revealed by these processes can be addressed to improve upon it.  
115 To facilitate a widespread adoption by the community, we have developed a web-based resource to share  
116 the model and its components, open sourcing extensive analyses, validations, and predictions that can be  
117 accessed as a complement to direct interaction with the model ([hippocampushub.eu](https://hippocampushub.eu)). Finally, we have  
118 developed a massive online open course (MOOC) to introduce users to the building, analysis, and simu-  
119 lation of a rat CA1 microcircuit (<https://www.edx.org/course/simulating-a-hippocampus-microcircuit>)  
120 providing a smaller version of the full-scale model for education purposes.

## 121 **2 Results**

122 We divide the results section into model reconstruction and simulation of the oscillatory activity in CA1.  
123 For a list of abbreviations and acronyms used in the paper, see Table S1.

### 124 **2.1 Model reconstruction**

125 In this section, we describe how we reconstructed the main components of the model: the cornu  
126 Ammonis 1 (CA1), the Schaffer collaterals (SC), and the effect of acetylcholine (ACh) on CA1. Each  
127 main component is a compound model of several "building blocks" (Figures 1 and S2) for which we  
128 show how, from the sparse data available in the literature (see Tables S3-S24) and a list of assumptions  
129 (Section 4.26), we arrived at the dense data necessary to ascribe a value for each model parameter.  
130 Finally, we show validations of the building blocks to assess their validity and robustness.

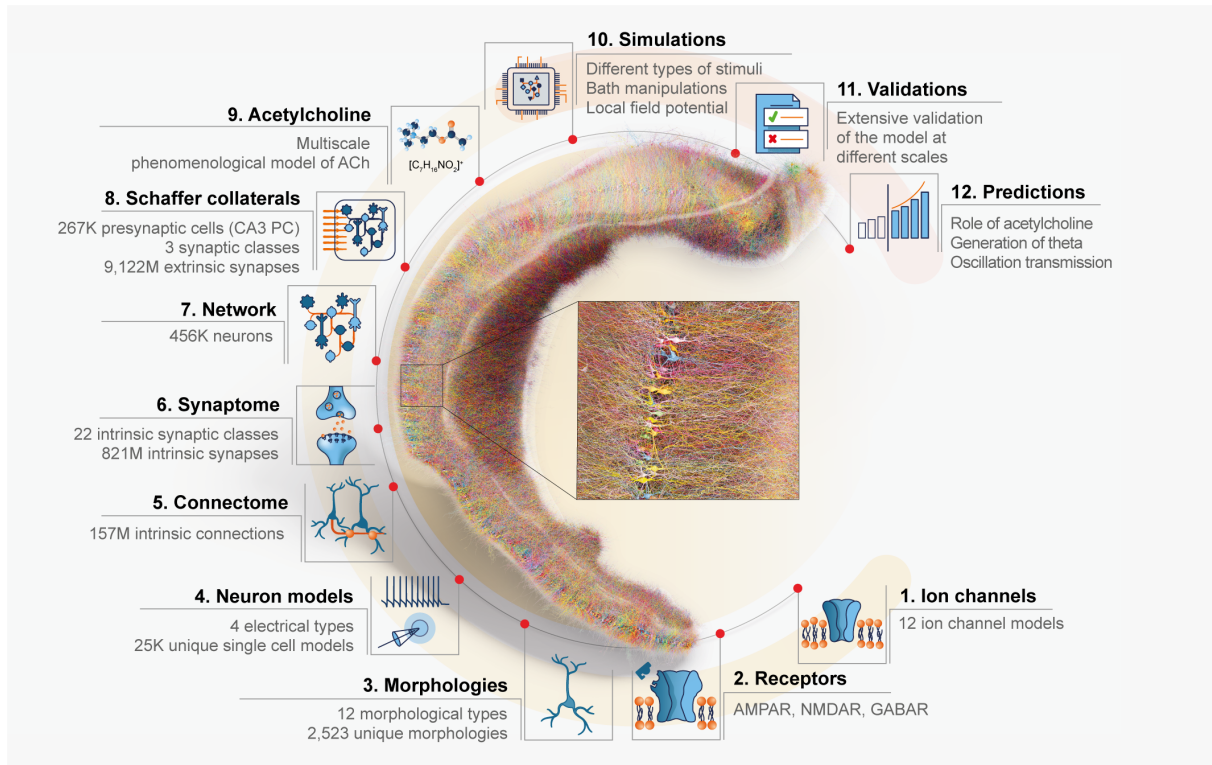

Figure 1: **Overview of the model.** A visualization of a full-scale, right-hemisphere reconstruction of rat CA1 region and its components. The number of cells is reduced to 1% for clarity, and neurons are randomly colored. The CA1 network model integrates entities of different spatial and temporal scales. The different scales also reflect our bottom-up approach to reconstruct the model. Ion channels (1) were inserted into the different morphological types (3) to reproduce electrophysiological characteristics and obtain neuron models (4). Neurons were then connected by synapses to generate an intrinsic CA1 connectome (5). For each intrinsic pathway, synaptic receptors (2) and transmission dynamics were assigned based on single neuron paired recording data (6) to create a functional intrinsic CA1 network model (7). The intrinsic CA1 circuit received synaptic input from CA3 via Schaffer collateral (SC) axons (8). The neuromodulatory influence of cholinergic release on the response of CA1 neurons and synapses was modeled phenomenologically (9). The dynamic response of the CA1 network was simulated with a variety of manipulations to model *in vitro* and *in vivo*, intrinsic and extrinsic stimulus protocols while recording intracellularly and extracellularly (10) to validate the circuit at different spatial scales against specific experimental studies (11) and to make experimentally testable predictions (12).

### 131 2.1.1 Building CA1

132 To reconstruct a full-scale model of rat CA1, we created biophysical models of its neurons, defined an  
133 atlas volume of the region for one hemisphere, placed these neurons in the volume, and connected them  
134 together by following and adapting the method described in Markram et al. (2015) (Figure S2).

### 135 CA1 neurons

136 To achieve a full-scale version of CA1, we needed to populate the model with  $\sim 456,000$  cells. We  
137 started by curating 43 morphological reconstructions of neurons belonging to 12 morphological types:

138 pyramidal cell (PC), axo-axonic cell (AA), two subtypes of bistratified cell (BS), back-projecting cell  
139 (BP), cholecystokinin (CCK) positive basket cell (CCKBC), ivy cell (Ivy), oriens lacunosum-moleculare  
140 cell (OLM), perforant pathway associated cell (PPA), parvalbumin positive basket cell (PVBC), Schaffer  
141 collateral associated cell (SCA), and trilaminar cell (Tri). To increase the morphological variability, we  
142 scaled and cloned them producing an initial morphology library of 2,592 reconstructions.

143 To validate the resulting morphology library, we compared them morphometrically and topologically  
144 to the original morphologies. The similarity scores for the distribution of morphological features were  
145 statistically similar (Figure S3, all values  $R > 0.98$ ,  $p < 10^{-25}$ ). Using the Topological Morphology  
146 Descriptor (TMD) (Kanari et al., 2018), the persistence diagrams (Figure S4) show an increase in  
147 morphological variability introduced by the cloning process (details per m-type in Figures S5 and S6).

148 To produce electrical models (e-models), we began by taking 154 single-cell recordings and classifying  
149 traces into four electrical types (e-types) using Petilla nomenclature (Petilla Interneuron Nomenclature  
150 Group et al., 2008): classical accommodating for pyramidal cells and interneurons (cACpyr, cAC), burst-  
151 ing accommodating (bAC), and classical non-accommodating (cNAC). From each trace, we extracted  
152 electrical features (e-features) which we used in combination with the curated morphologies to produce  
153 and validate 36 single-cell e-models (R. Migliore et al., 2018; Ecker et al., 2020). In the case of pyramidal  
154 cells e-models, they showed a close correlation to experimental findings in terms of back-propagating  
155 action potential (BPAP) (Golding et al., 2001,  $R = 0.878$ ,  $p = 0.121$ ) and post-synaptic potential  
156 (PSP) attenuation (Magee and Cook, 2000,  $R = 0.846$ ,  $p = 0.001$ , Figure S7).

157 To match the proportions of the morpho-electrical type (me-type) composition of the CA1 (Table S4),  
158 we combined the 36 e-models with 2,592 curated morphologies to obtain an initial library of 26,112  
159 unique me-type models. This is the pool of biophysical cell models available to populate the full-scale  
160 version of CA1.

## 161 **Defining the spatial framework**

162 To represent the CA1 spatial volume, we started with a publicly available atlas reconstruction of the  
163 hippocampus (Ropireddy et al., 2012). Our aim was to create a continuous coordinate system to  
164 represent the three axes of the hippocampus (longitudinal, transverse, and radial) and a precise vector  
165 field for cell placement and orientation (Figure 2). For our building and analysis algorithms to work  
166 effectively, we applied a series of post-processing steps (Figure S8, see Section 4.13). Within this process,  
167 we redefined the layers parametrically to be consistent with the layer thicknesses in our datasets (Section  
168 4.13.3).



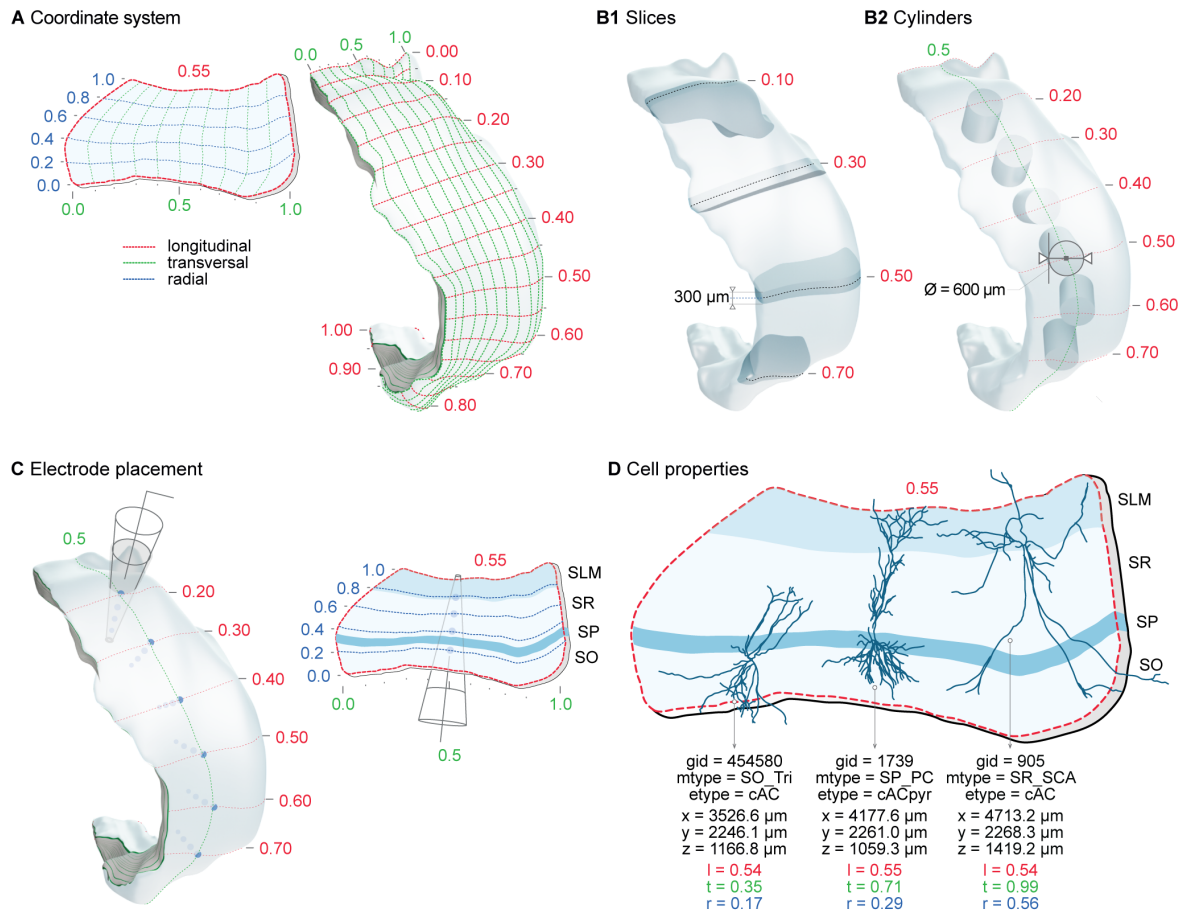

**Figure 2: Coordinate system.** Custom parametric coordinates system used as spatial reference for circuit building, circuit segmentation, and for simulation experiments. A. Longitudinal (l, red), transverse (t, green) and radial (r, blue) axes of the CA1 volume are defined parametrically in range [0,1]. Left: Slice from volume shows radial depth from SO/alveus (r=0) to SLM/pial (r=1) and transverse extent from CA3/proximal CA1 (t=1) to distal CA1/subiculum (t=0) boundaries. Right: Full volume shows surface grid of transverse vs longitudinal axes. Longitudinal axis extends from dorsal (l=0) to ventral (l=1) CA1. B. Circuit segmentation for analysis and simulation. Coordinates system used to select CA1 slices of a given thickness (B1) or a cylinders of a given diameter (B2) at specific locations along longitudinal axis. C. Extracellular electrode placed at a given surface position (left) and channels at selected laminar depth (right) in CA1 volume. D. Each neuron in the circuit is defined by a unique general identifier (gid), its morphological type (m-type), electrical type (e-type), spatial xyz-coordinates and parameterized ltr-coordinates.

## 169 Placing neurons in the volume

170 After defining the volume, we wanted the model to match the neuronal density and proportion of cell  
 171 types in rat CA1. We compiled available data to derive the cellular composition (Section 4.14, see Table  
 172 S3) and used it to populate the atlas with soma locations (Figure S9A,B). To check the consistency,  
 173 we validated the resulting cell composition ( $R = 0.999$ ,  $p = 1.31 \times 10^{-28}$ ) and cell density ( $R = 0.999$ ,  
 174  $p < 0.0001$ ) (Figure S10B,C, Table S5). At each soma location, we needed to select from the e-model



175 library the neuron that best fits in the space of the layers. To this purpose, we oriented its morphology  
176 according to the vector fields (Figure S9C,D) and evaluated it against a set of rules that describe the  
177 target distribution of neurites per layer (Table S6). Visually, cells in our model follow the curvature of  
178 the hippocampus and the different parts of the cells target the expected layers (Figure S10A). Subject  
179 to the multiple constraints of the cell placement algorithm, we placed 456,380 neurons in the volume,  
180 utilizing 2,523 unique morphologies and 25,355 unique neuron models.

## 181 **Connecting CA1 neurons**

182 To connect the placed neurons, we used the connectome algorithm previously described in Reimann et al.  
183 (2015). In brief, the algorithm searches for co-localization of axon and postsynaptic neurons within a  
184 certain distance to identify a potential synapse (or apposition). After identifying all potential synapses, a  
185 subsequent pathway-specific pruning step discards some to match the known bouton densities (Table S7)  
186 and number of synapses per single axon connection (Table S9). This algorithm has been demonstrated  
187 to accurately recreate local connectivity (Markram et al., 2015; Reimann et al., 2022; Iavarone et al.,  
188 2023) as well as higher-order topological features (Gal et al., 2017). The resulting intrinsic connectome  
189 consisted of about 821 million synapses.

190 Given the importance of the connectome, we wanted to validate it as widely as possible to mitigate the  
191 uncertainty in our assumptions and literature data. In the case of pathways for which we had no specific  
192 data, we were instead able to offer testable, model-based predictions (Figures S12, S13, S14, and S15).  
193 First, we verified the bouton density and number of synapses per connection used in the pruning step was  
194 preserved in the generated connectome (bouton density:  $R = 0.909$ ,  $p = 0.0120$ ; number of synapses  
195 per connection:  $R = 0.992$ ,  $p = 2.41 \times 10^{-9}$ , Figure S12 and Tables S7 and S9). Next, we observed  
196 that the shape of the distributions for connection probability (Figure S13A), convergence (Figure S14A)  
197 and divergence (Figure S15A) were positively skewed as reported experimentally (Giacopelli et al.,  
198 2021). In the case of mean connection probability, experimental data did not allow a direct comparison  
199 because the distance between the neuron pairs tested was typically missing (Figure S13C, Table S8).  
200 For convergence, we found that the sub-cellular distribution of synapses on different compartments of  
201 pyramidal cells in our model was consistent with Megias et al. (2001) ( $R = 0.988$ ,  $p = 0.012$ , Figure  
202 S14D). For divergence, the model did not always closely match the experimental data for the total  
203 number of synapses per axon formed by certain m-types ( $R = 0.524$ ,  $p = 0.286$ , Figure S15C, Table  
204 S10). We compared divergence also in terms of the percentage of synapses formed with PCs or INTs  
205 (Figure S15D, Table S11) and validated the distribution of efferent synapses in the different layers (SO:  
206  $R = 0.798$ ,  $p = 0.057$ ; SP:  $R = 0.905$ ,  $p = 0.013$ ; SR:  $R = 0.813$ ,  $p = 0.049$ ; SLM:  $R = 0.999$ ,  
207  $p = 4.11 \times 10^{-8}$ , Figure S15E, Table S12). Overall, this suggests the model connectome provides a  
208 reasonable approximation based on available data, while the discrepancies can be due, for example, to  
209 the small sample size and high variability in axon length recovered from *in vitro* slices.

210 To provide functional dynamics for synaptic connections with stochastic neurotransmitter release and  
211 short-term plasticity (see Figure S16), we used the optimized parameters we previously derived in Ecker  
212 et al. (2020) for the 22 intrinsic synaptic classes of pathways we have identified (Tables S13 and S14).  
213 The model was able to reproduce the post-synaptic potential (PSP) amplitudes (Figure S16D,  $R =$   
214  $0.999$ ,  $p = 1.65 \times 10^{-19}$ ) and post-synaptic current (PSC) coefficient of variation (CV) of the first peak

215 (Figure S16E,  $R = 0.840$ ,  $p = 0.018$ ) for the pathways with available electrophysiological recordings.  
216 After having constrained and validated the synapses, the reconstruction process of the intrinsic CA1  
217 circuit is complete.

## 218 2.1.2 Reconstruction of Schaffer collaterals (SC)

219 An isolated CA1 does not have substantial background activity (Harris & Stewart, 2001), while normally  
220 the network is driven by external inputs. The Schaffer collaterals from CA3 pyramidal cells are the most  
221 prominent afferent input to the CA1 and the most studied pathway in the hippocampus (Szirmai et al.,  
222 2012; Dumas et al., 2018). Their inclusion allows us to deliver synaptic activity input patterns to the  
223 CA1.

224 To reconstruct the anatomy of Schaffer collaterals, we constrained the number of CA3 fibers and  
225 their average convergence on CA1 neurons with literature data (Tables S15 and S16). Due to scarce  
226 topographical information, we distributed synapses uniformly along the transverse and longitudinal axes,  
227 while along the radial axis we followed a layer-wise distribution as reported by Bezaire and Soltesz (2013).  
228 The resulting Schaffer collaterals added more than 9 billion synapses to CA1, representing 92% of total  
229 modelled synapses. As expected, the synapse laminar distribution (Figure 3A-C) and mean convergence  
230 on PCs and interneurons (Figure 3D,E) match experimental values (one-sample t-test,  $p = 0.957$  for  
231 PCs and  $p = 0.990$  for INTs). Interestingly, other unconstrained properties also match experimental  
232 data. The convergence variability is comparable with the upper and lower limits identified by Bezaire and  
233 Soltesz (2013) (model PC:  $20,878 \pm 5,867$  synapses and experimental PC: 13,059 - 28,697, model INT:  
234  $12,714 \pm 5,541$  and experimental INT 7,952 - 17,476, Figure 3D,E). In addition, the axonal divergence  
235 from a single CA3 PC is  $34,135 \pm 185$  synapses (Figure S17A), close to the higher end of the ranges  
236 measured by Sik et al. (1993), Li et al. (1994), and Wittner et al. (2007) (15,295 - 27,440, Figure S17B).  
237 Finally, most of the connections formed a single synapse per neuron ( $1.0 \pm 0.2$  synapses/connection,  
238 Figure S17A), consistent with what has been previously reported (Bezaire & Soltesz, 2013).

239 The CA3 afferent pathway is sparsely connected to the CA1, so the chance of obtaining paired CA3-CA1  
240 neuronal recordings is small between PCs and much smaller from PC to interneurons (Sayer et al., 1990;  
241 Debanne et al., 1995; Wierenga & Wadman, 2003; Milstein et al., 2015). So, to constrain SC physiology  
242 we did not have enough data to follow the parametrization used for intrinsic synapses (Ecker et al., 2020).  
243 Instead, we used the available data (Tables S17 and S18) and optimized the missing parameters as shown  
244 in Figure S17C. The resulting SC→PC synapses match the distribution of EPSP amplitudes as measured  
245 by Sayer et al. (1990) (Figure 3F, experiment:  $0.14 \pm 0.11$  mV, CV = 0.76, model:  $0.15 \pm 0.12$  mV, CV =  
246 0.80, z-test  $p = 0.709$ ), giving a peak synaptic conductance of  $0.85 \pm 0.05$  nS and  $N_{RRP}$  of 12. The rise  
247 and decay time constants of AMPA receptors (respectively 0.4 ms and  $12.0 \pm 0.5$  ms) were obtained by  
248 matching Sayer et al. (1990) EPSP dynamics (Figure S17C, 10-90% rise time model:  $5.4 \pm 0.9$  ms and  
249 experiment:  $3.9 \pm 1.8$  ms, half-width model:  $20.3 \pm 2.9$  ms and experiment:  $19.5 \pm 8.0$  ms, decay time  
250 constant model:  $19.5 \pm 2.5$  ms and experiment:  $22.6 \pm 11.0$  ms). In the case of SC→INT synapses, we  
251 distinguished between cannabinoid receptor type 1 negative (CB1R-) and positive (CB1R+) interneurons  
252 (Glickfeld & Scanziani, 2006). SC→CB1R- synapses match  $EPSC_{CB1R-}/EPSC_{PC}$  experimental ratio  
253 (Glickfeld & Scanziani, 2006) (model  $6.950 \pm 9.200$  and experiment  $8.15 \pm 6.00$ , z-test  $p = 0.18$ , Figure  
254 3G), resulting in a peak conductance of  $15.0 \pm 1.0$  nS and  $N_{RRP}$  of 2. SC→CB1R+ synapses match

255 the  $EPSC_{CBR+}/EPSC_{PC}$  experimental ratio (model  $1.27 \pm 1.78$  and experiment  $1.09 \pm 1.44$ , z-test  
 256  $p = 0.06$ , Figure 3H), giving peak conductance of  $1.5 \pm 0.1$  nS and  $N_{RRP}$  of 8. SC→INT synapses  
 257 (all) match the timing in the EPSP-IPSP sequence of Pouille and Scanziani, 2001 (model:  $2.69 \pm 1.18$   
 258 ms, experiment:  $1.9 \pm 0.6$ , Figure S17E), yielding a rise and decay constants for AMPA receptors of  
 259  $0.1$  ms and  $1.0 \pm 0.1$  ms, respectively. This short latency gives effective feedforward inhibition, which  
 260 is a key aspect for the transmission of oscillations from CA3 to CA1 (see below).

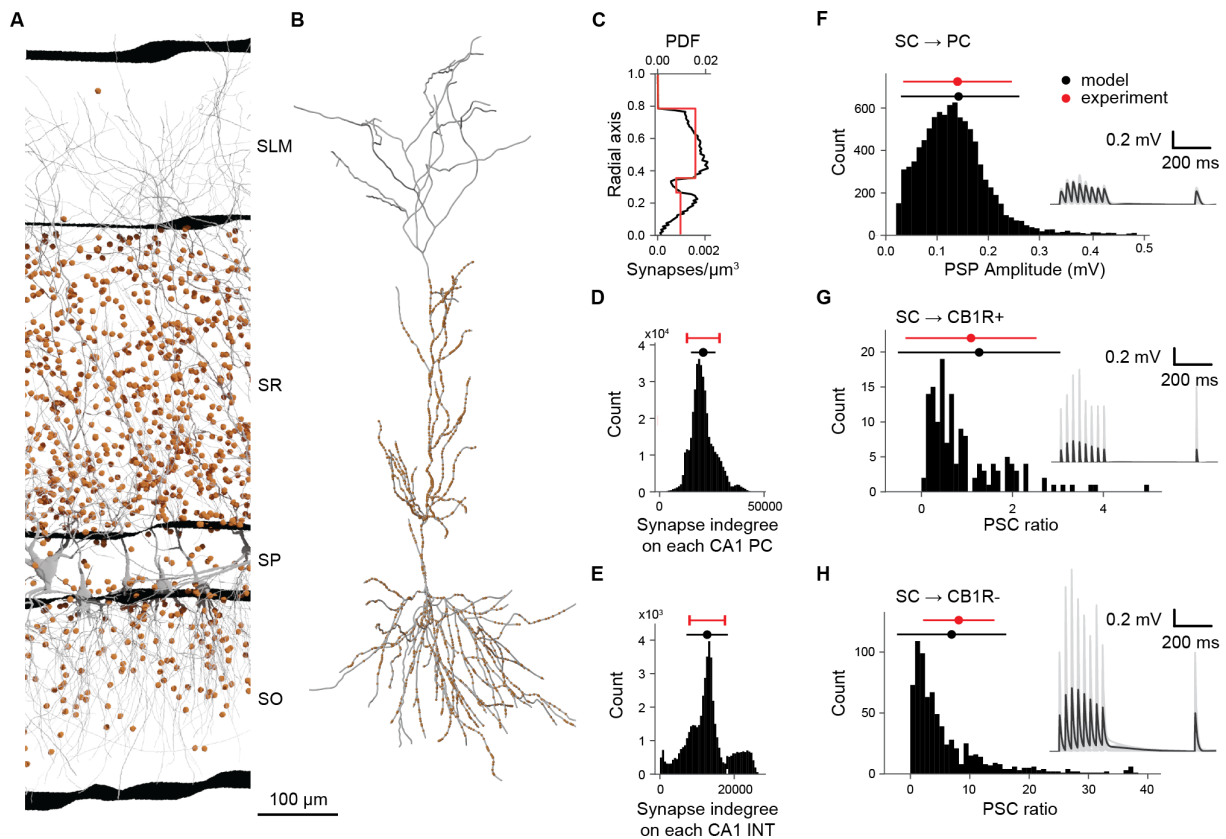

Figure 3: **Schaffer collaterals anatomy and physiology.** A. Section of a slice of the dorsal CA1 showing neurons in gray and SC synapses in orange (10% of the existing ones). B. Example of SC synapse placement (orange dots) on one reconstructed PC (in grey). C-H. Validation of the anatomy (C-E) and physiology (F-H) of the SC. Density of SC synapses (lower x axis) and probability density function (PDF) (upper x axis) at different depths (radial axis percentage) (C). Distributions of afferent synapses from SC to PC (D) and INT (E). Distribution of PSP amplitudes for SC → PC synapses (F). Distribution of PSC ratio (see text) for SC → CB1R+ (G) and SC → CB1R- (H). Insets in panels F-H report voltage membrane traces of 10 randomly selected pairs of SC → PC, SC → CB1R+, and SC → CB1R- interneurons, respectively. The presynaptic SC is stimulated to fire 8 times at 30 Hz, plus a recovery pulse after 500 ms from the last spike of the train. Solid black lines represent mean values, and shaded gray areas the standard deviation.

261 We functionally validated SC projections reproducing Sasaki et al. (2006), where the authors examined  
 262 the basic input-output (I-O) characteristics of SC projections *in vitro*. The SC pathway is thought to  
 263 be dominated by feedforward inhibition, which increases the dynamic range of the CA1 network and  
 264 linearizes the I-O curve (Sasaki et al., 2006; Pouille et al., 2009). Blocking gamma-aminobutyric acid

265 receptor ( $GABA_A$ R) drastically reduces the dynamic range of the network resulting in an I-O curve that  
266 saturates very quickly. To match the methodology of Sasaki et al. (2006), we set up the simulations to  
267 be as close as possible to the experimental conditions (slice of  $300\ \mu\text{m}$ ,  $Ca^{2+}$   $2.4\ \text{mM}$ ,  $Mg^{2+}$   $1.4\ \text{mM}$ ,  
268  $32^\circ\text{C}$ ) (Figure 4A) and we used the same sampling strategy: randomly sampling 101 neurons in the slice  
269 to find how many SC axons were required to make all of them fire (representing respectively 100% of the  
270 input and 100% of output, Figure 4B). To assess the role of feedforward inhibition, we mimic the effect  
271 of gabazine by disabling the connections from interneurons. The model captured the quasi-linearization  
272 of the I-O response in control conditions (Pearson test on linearity  $R = 0.992$ ,  $p = 2.56 \times 10^{-9}$ ) and the  
273 rapid saturation of the CA1 network with the simulated "no GABA" condition (Figure 4B). In control  
274 conditions, at 50% of input intensity (Figure 4C) the spiking activity of CA1 SP neurons is rather weak  
275 and rapidly suppressed by the feedforward inhibition, while without inhibition CA1 neurons fire for more  
276 than 50 ms at high frequency (up to 200 Hz). Taken together, these results suggest the SC projection  
277 represents a valid model given the available empirical data.

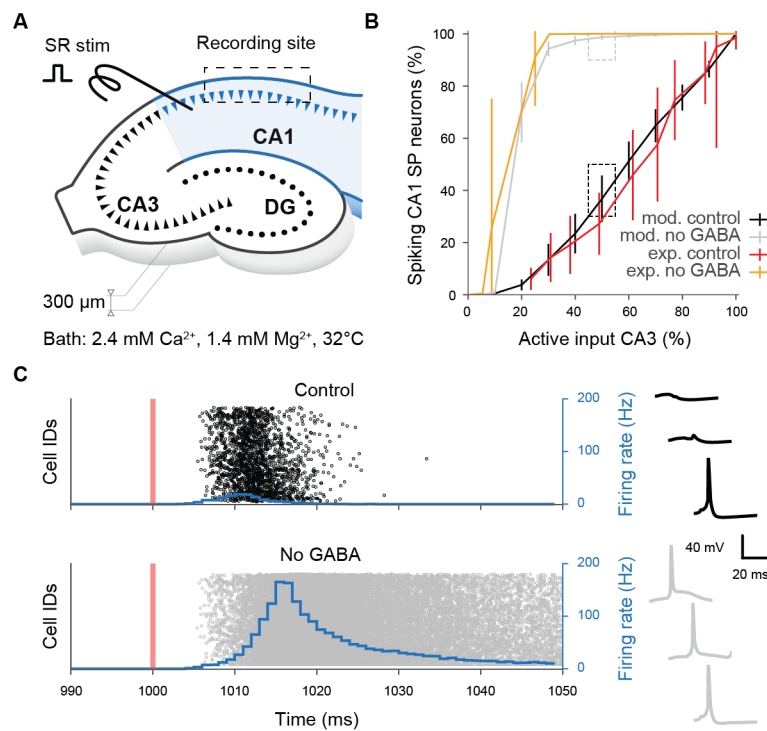

Figure 4: **Schaffer collaterals validation.** Effect of the feedforward inhibition on the input-output relationship of the network illustrated in a slice experiment. A. The illustration (redrawn from Figure 1A of Sasaki et al. (2006)) shows the *in silico* experimental setup. B. Response of 101 selected neurons to an increasing number of stimulated SC fibers, with and without GABA. The dashed boxes identify the condition (50% of active SC) that is used to show the model's results in panel C. C. Raster plots of SP neurons in response to the SC stimulation (orange vertical line) with the overlaying firing rate (blue). On the right, membrane voltage traces of three randomly selected SP neurons in control (black) and no GABA (gray) conditions.

### 278 **2.1.3 Cholinergic modulation**

279 The behavior of the hippocampus is shaped by several neuromodulators, with acetylcholine (ACh)  
280 among the most studied. Cholinergic fibers originate mainly from the medial septum (MS) and have  
281 been correlated with phenomena such as theta rhythm, plasticity, memory retrieval and encoding, as  
282 well as pathological conditions such as Alzheimer's disease (Dannenberg et al., 2017). This section  
283 describes the reconstruction of a phenomenological model of ACh, quantifying the effects of ACh on  
284 neurons and synapses, and developing a novel method to integrate available experimental data (Tables  
285 S19 and S20, Figure 5A,B). The data used to build the model was obtained from *in vitro* application  
286 of various cholinergic agonists such as ACh and carbachol (CCh); here we assume that their effects are  
287 comparable (Colangelo et al., 2019). We modelled the effect of ACh on neurons and synapses. The  
288 effect on neurons results in an increase in resting membrane potential or firing frequency. We were able  
289 to integrate both types of experimental data by estimating the net current that is required to evoke  
290 the corresponding changes for a given concentration of ACh (see equation 9 in Methods). ACh affects  
291 synaptic transmission acting principally at the level of release probability (Tsodyks & Markram, 1997;  
292 M. E. Hasselmo, 2006; D. Yang et al., 2021) (see equation 10 in Methods).



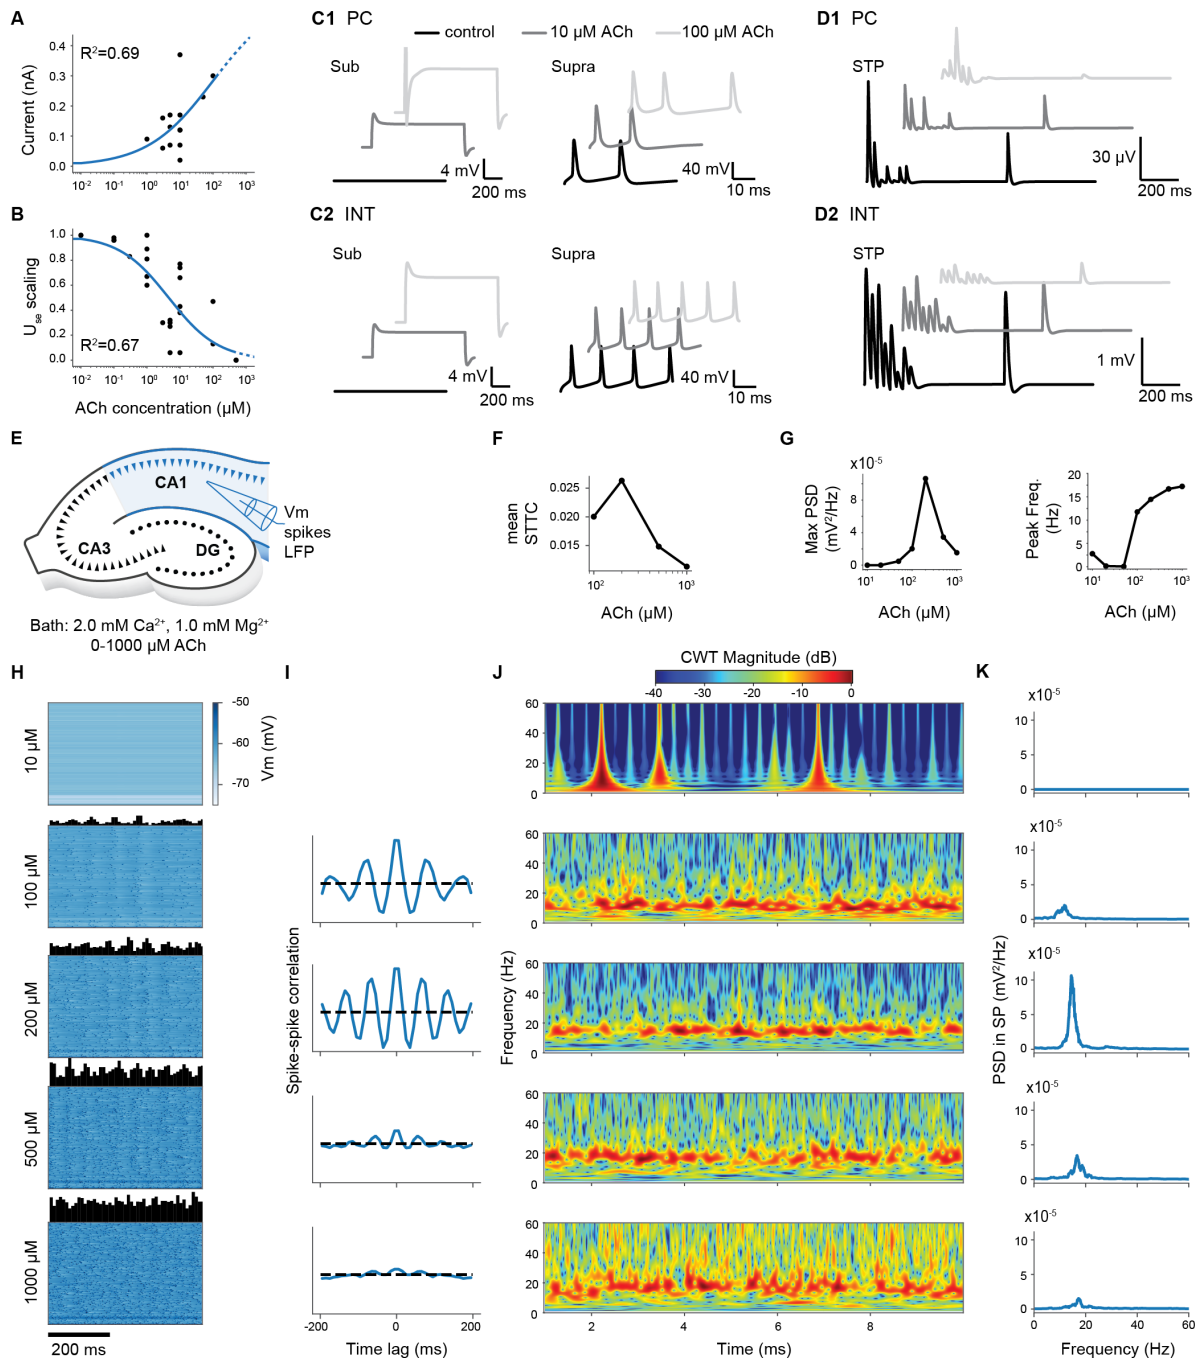

**Figure 5: Effects of Acetylcholine on neurons, synapses, and network.** A. Dose-response modulation of neuronal excitability caused by ACh. Back dots are experimental data points; blue curve represents the fitted equation. The dashed part of the curve indicates regions outside available experimental data. B. Dose-response modulation of synaptic release. Same color code as in A. C. Example traces for PC (C1) and interneurons (C2) in sub-threshold and supra-threshold conditions, with different concentrations of ACh. D. Example traces showing the STP dynamics for PC (D1) and interneurons (D2) at different concentrations of ACh. E. The illustration shows the *in silico* experimental setup to analyze network effects of ACh. Different concentrations of CCh are applied to the circuit, and multiple types of recordings made in the CA1 (membrane voltage, spike times, LFPs). F. Mean spike time tiling coefficient (STTC) as a function of ACh concentration. G. Maximum of the LFP power spectrum density (PSD) and peak frequency as a function of ACh concentration. H. The voltage of 100 randomly selected neurons at different levels of ACh. The upper histograms show the instantaneous firing rate. I. Spike-spike correlation histograms. J. Spectrogram of the LFP measured in SP at different ACh levels. K. PSD of the LFP recorded in SP.

293 Once we had modelled the effect of ACh on neuron excitability and synaptic transmission, we validated  
294 the effect of ACh at the network level against available data (see Table S21). To accomplish this,  
295 we simulated bath application of ACh for a wide range of concentrations (from 0  $\mu\text{M}$  (i.e., control  
296 condition) to 1000  $\mu\text{M}$ ) (Figure 5E,F). We observed a subthreshold increase in the membrane potential  
297 of all neurons for values of ACh lower than 50  $\mu\text{M}$ , without any significant change in spiking activity.  
298 At intermediate doses (i.e., 100  $\mu\text{M}$  and 200  $\mu\text{M}$ ), the network shifted to a more sustained activity  
299 regime. Here, we observed a generalized increase in firing rate as ACh concentration increased and a  
300 progressive build-up of coherent oscillations whose frequencies ranged from 8 to 16 Hz (from high theta  
301 to low beta frequency bands). The correlation peak between CA1 neurons occurred at 200  $\mu\text{M}$  ACh  
302 (Figure 5G,H). At very high concentrations (i.e., 500  $\mu\text{M}$  and 1000  $\mu\text{M}$ ) we observed a decrease in the  
303 power of network oscillations, which was further confirmed by analysis of local field potential (LFP)  
304 (Figure 5I). Power spectral density (PSD) analysis showed a maximum absolute amplitude for 200  $\mu\text{M}$   
305 ACh with a peak frequency of  $\sim 15$  Hz (Figure 5J,K). Higher concentrations decreased the maximum  
306 amplitude of the PSD while the peak frequency converged toward 17 Hz (Figure 5K). Thus, we observe  
307 the emergence of three different activity regimes at low, intermediate, and high levels of cholinergic  
308 stimulation. It is unclear whether the network behavior we observe is consistent with all experimental  
309 findings because of their different methodologies. Nevertheless, this phenomenological model of ACh  
310 allows the reproduction of other experiments in which ACh or its receptor agonists are necessary (see,  
311 for example, Sections 2.2.1 and 2.2.2).

## 312 **2.2 Model simulation and investigations**

313 By following a data-driven approach and independently validating each model component, we have  
314 arrived at a candidate reference model. It can serve as a basis for investigating several scientific questions  
315 where parameters are only adjusted to reflect the different experimental setups, rather than tuned to  
316 achieve a specific network behavior. A simulation experiment is essentially a model of the experimental  
317 setup that is reproduced with as much accuracy as possible within the limits of the model. As presented  
318 in the Model reconstruction section we can, for example, simulate slices of a certain thickness, change  
319 the extracellular concentration of ions, change temperature, and enable spontaneous synaptic events.  
320 Here, we show several simulations with particular emphasis on theta oscillations, a prominent network  
321 phenomenon observed in the hippocampus *in vivo* and related to many behavioral correlates (Buzsáki,  
322 2005). Then, we go beyond the theta oscillations and test whether a wider range of frequencies can  
323 pass through SC more reliably than others.

### 324 **2.2.1 Theta oscillations**

325 During locomotion and REM sleep, CA1 generates a characteristic rhythmic theta-band (4-12 Hz) ex-  
326 tracellular field potential (Jung & Kornmüller, 1938; Green & Arduini, 1954; Grastyan et al., 1959;  
327 Vanderwolf, 1969; Goyal et al., 2020). Neurons in many other brain regions such as neocortex are  
328 phase-locked to these theta oscillations (Siapas et al., 2005; Sirota et al., 2008) suggesting hippocam-  
329 pal theta plays a crucial coordinating role in the encoding and retrieval of episodic memory during  
330 spatial navigation (Buzsáki, 2002, 2005). Yet despite more than eighty years of research, the trigger  
331 that generates theta oscillations in CA1 remains unclear because of conflicting evidence. This represents  
332 an opportunity to use our reference model to investigate these inconsistencies and gain an improved un-



333 understanding of theta generation. Specifically, we investigate three main candidate mechanisms proposed  
334 in literature (Colgin, 2013): intrinsic CA1 generation and extrinsic pacemaker oscillations from CA3 or  
335 from medial septum (MS).

### 336 CA1 generation

337 To investigate possible intrinsic mechanisms of theta rhythm generation in CA1 (Goutagny et al.,  
338 2009; Ferguson et al., 2017), we examined three candidate sources of excitation that might induce  
339 oscillations: (i) spontaneous synaptic release or miniature postsynaptic potentials (minis or mPSPs), (ii)  
340 homogeneous random spiking of SC afferent inputs, and (iii) varying bath concentrations of extracellular  
341 calcium and potassium to induce tonic circuit depolarisation. While in their CA1 circuit model Bezaire  
342 et al. (2016) reported random synaptic activity was sufficient to induce robust theta rhythms, in our  
343 model we found none of these candidates generated robust theta rhythms. For minis, we found setting  
344 release probabilities to match empirically reported mPSP rates (Table S22) led to irregular, wide-band  
345 activity in CA1 (see Figure S18). For random synaptic barrage, varying presynaptic rate to match the  
346 mean postsynaptic firing rate of pyramidal cells in Bezaire et al. (2016) resulted in irregular beta-band, not  
347 regular theta-band oscillations (see Figures S19 and S20). For tonic depolarisation, within a restricted  
348 parameter range it was possible to generate theta oscillations around 10-12 Hz, but their intensity was  
349 variable and episodic (see Figures S21 and S22). Therefore, we could not find any intrinsic mechanism  
350 capable of generating regular theta activity in our circuit.

### 351 CA3 input

352 To mimic the transmission of CA3 theta oscillations to CA1, we generated SC spike trains across a  
353 range of theta-modulated sinusoidal rate functions (signal frequency) at different mean individual rates  
354 (cell frequency) (Figure 6A). We delivered these stimuli at two different calcium levels (*in vitro*-like  
355 2 mM and *in vivo*-like 1 mM) for three different circuit scales (whole circuit, thick slice, and cylinder  
356 circuit; see Figure 2) and measured extracellular LFP and intracellular membrane potential. For LFP, we  
357 found CA1 faithfully followed the theta-modulation input frequency at both *in vivo*-like and *in vitro*-like  
358 calcium levels and at the different circuit scales tested (e.g. 8Hz, see Figure 6C-F). However, for the  
359 same stimulus, the LFP at *in vivo*-like calcium levels was around three orders of magnitude less powerful  
360 than the one at *in vitro*-like calcium levels (Figure 6B,C,F) due to CA1 spiking rates being far lower (e.g.  
361 in full circuit, pyramidal cell mean firing rate of  $0.00018 \pm 0.0067$  (1 mM) vs  $0.25 \pm 0.50$  Hz (2 mM)).  
362 Therefore, due to this very low firing rate, we decided not to analyse results from *in vivo*-like conditions  
363 further and focused on those from the *in vitro*-like condition only (Figure 6C-E).

364 We analyzed the properties of the model LFP and compared them to experimental data. First, we  
365 examined whether the circuit size is critical for theta generation. Contrary to Goutagny et al. (2009),  
366 we found that all the three circuit scales generated theta oscillations, but slice and cylinder circuits had  
367 reduced magnitude of the modulation and LFP power (Figure 6C-E). Second, across all the scales, the  
368 LFP waveform (Figure 6A-C, left columns) was more asymmetrical with a fast rise and slower decay  
369 (mean asymmetry index =  $-1.34 \pm 0.23$ ; see Figure S23) with respect to what was reported during  
370 rat locomotion (asymmetry index = -0.27, Buzsáki et al. (1985)) or REM sleep periods (asymmetry  
371 index = -0.13, Belluscio et al. (2012)). Third, we observed a strong narrow-band peak of power at the

372 same frequency as the signal that was maintained throughout the entire period of stimulation (Figure  
 373 6A-C, middle left columns). Fourth, consistent with experimental evidence (e.g. Figure 1b in Goutagny  
 374 et al., 2009), first- (16 Hz) and second-order (24 Hz) harmonics of the theta modulation frequency were  
 375 also present (Figure 6A-C, middle right columns). Fifth, current source density (CSD) showed a highly  
 376 regular alternating current dipole between layers with a phase reversal between SP and SR (Figure 6A-C,  
 377 far right column). This is similar to *in vivo* LFP recordings in the absence of perforant pathway input  
 378 (Buzsáki, 2002), which we did not model. Therefore, since the results did not depend qualitatively on  
 379 circuit size, for the sake of simplicity, we further analyzed only the cylinder circuit.

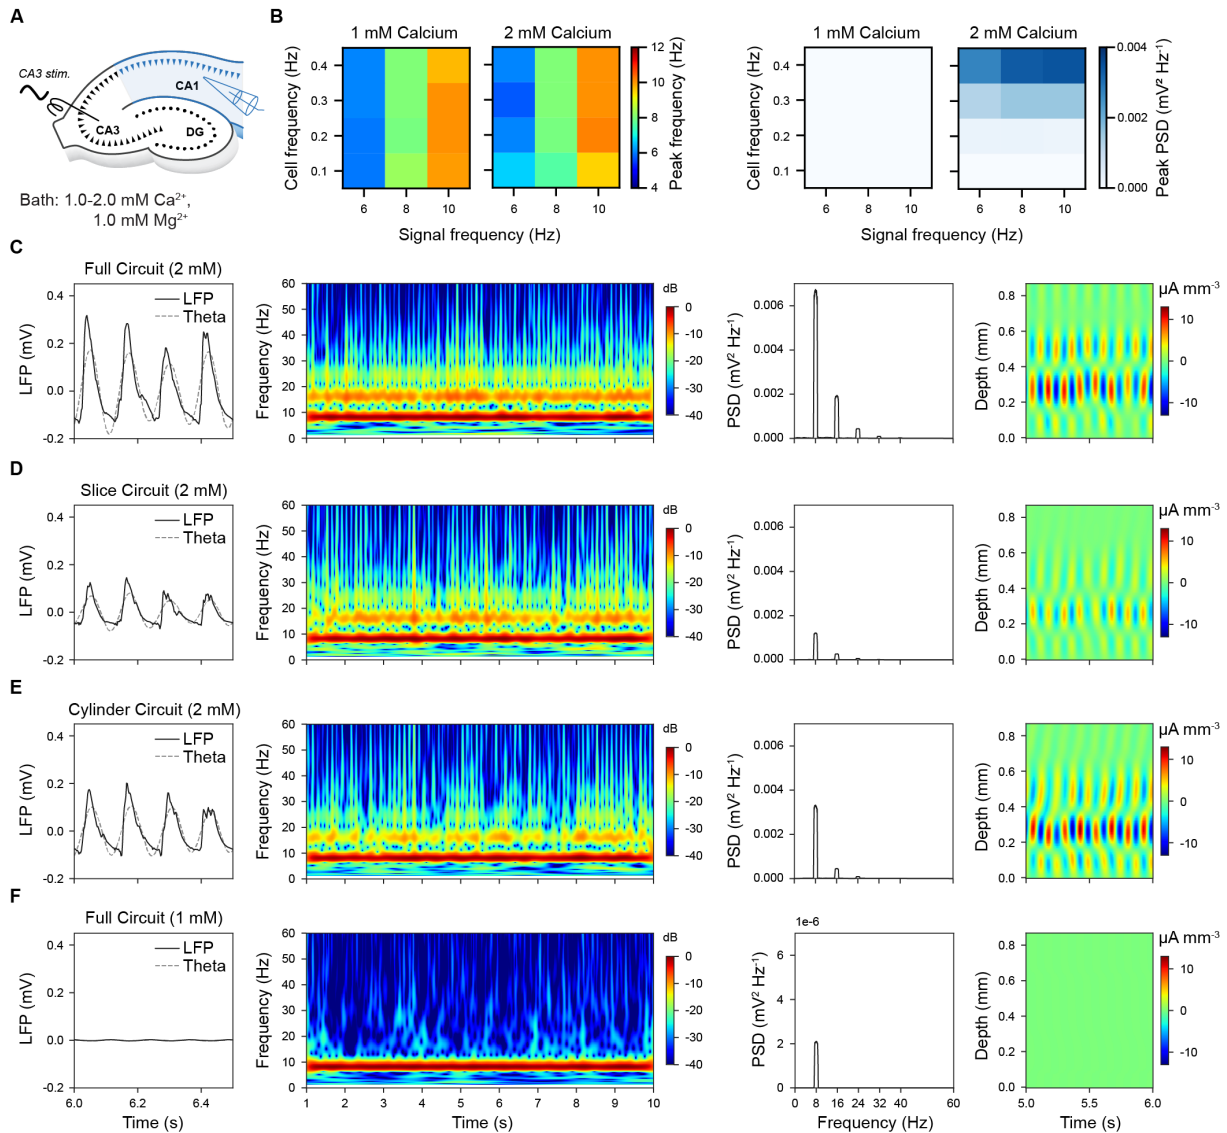

**Figure 6: CA3 theta (8 Hz) oscillatory input entrains CA1 to matched theta oscillation across different scales of circuit.** A. Schema showing the *in silico* experimental setup. B. Dependency of peak frequency (left) and PSD (right) from calcium level, cell and signal frequencies during simulations of a cylinder circuit. C. Full circuit model (2 mM calcium). LFP recordings from SP (far left), spectrogram (left middle), power spectral density (right middle), current source density (far right). D. Slice circuit model (thickness of 300  $\mu$ m, 2 mM calcium). E. Cylinder circuit model (radius of 300  $\mu$ m, 2 mM calcium). F. Full circuit model (1 mM calcium). Note that PSD has 1000 times smaller y-axis scaling than the ones in panels A-C).

380 Next, we looked at how the spiking of different neuronal classes in the model are modulated by theta  
381 oscillations (Klausberger et al. (2003, 2004), Klausberger (2005), and Fuentealba et al. (2008); see  
382 Table S23). When the spike times of neurons close to the extracellular recording electrode in SP were  
383 compared with the phases of theta-band LFP rhythm (theta trough =  $0^\circ$ ), all neuron types were found  
384 to respond at roughly the same phase of the theta cycle (Figure 7). As the mean rate of SC afferent  
385 spiking increased, more neurons became phase-locked yielding a denser mono-phase distribution for  
386 higher signal modulation frequencies (Figure 7A). For example, under stimuli with a 0.4 Hz SC mean  
387 spiking frequency and 8 Hz signal modulation, CA1 PCs fired first during the mid-rising phase of theta  
388 and were followed by all types of interneurons, whose spiking mostly ended before peak theta, with  
389 BS neurons emitting few or no spikes (Figure 7B left). Phase-locked neurons had a tighter tuning  
390 than *in vivo*, with pyramidal neurons typically firing before interneurons (Figure 7B middle). When  
391 compared with *in vivo* recordings of phase-locked neurons (see Table S23), the mean phase angle of  
392 model spiking was closely matched for SP\_CCKBC but substantially out of phase for SP\_AA (Figure  
393 7B right). Although the angular deviation of phase-locking was generally tighter than observed *in vivo*  
394 (e.g. model vs *in vivo* for SP\_AA  $8.9^\circ$ (n=4) vs  $55.0^\circ$ (n=2), SP\_PVBC  $12.0^\circ$ (n=2) vs  $68.0^\circ$ (n=5), and  
395 SP\_lvy  $10.9^\circ$ (n=19) vs  $63.1^\circ$ (n=4)).

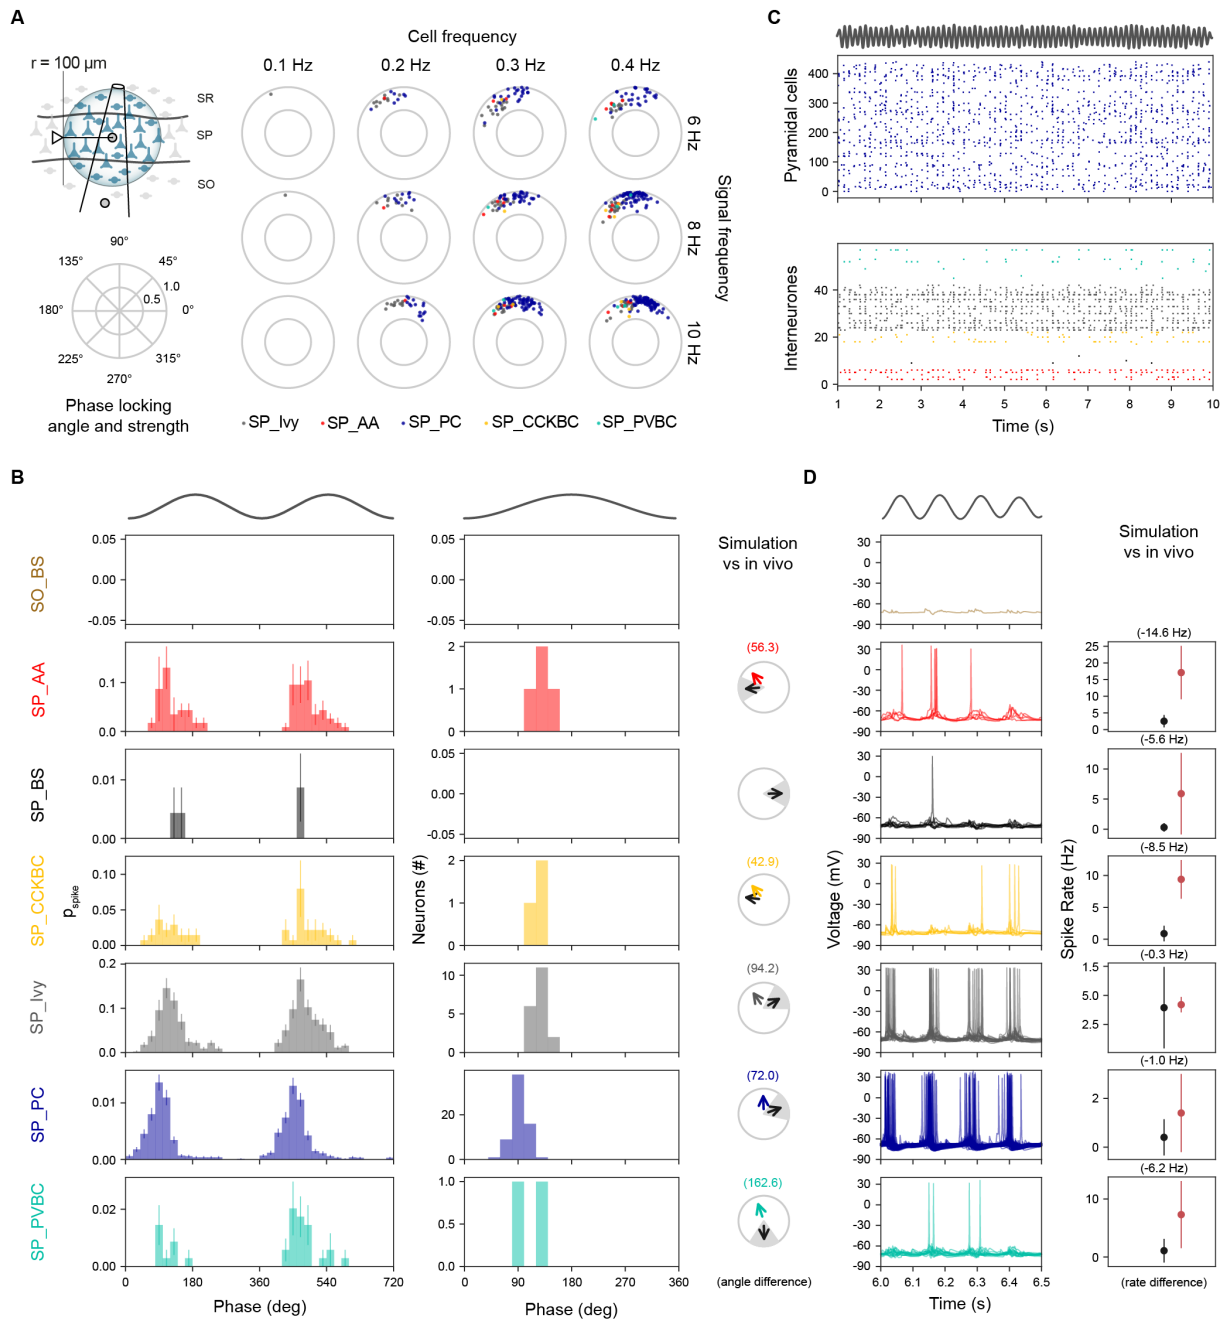

Figure 7: **CA1 morphological types are homogeneously tuned to CA3 theta oscillatory input.** A. Neurons for analysis were selected within 100  $\mu\text{m}$  radius of the stratum pyramidale electrode location (top left). Phase locking angle and strength for a range of individual (CA3) cell frequencies (columns) and modulation frequencies (rows). B. Phase Modulation. Spike discharge probability of all neurons grouped by morphological type (left). Phase locked neurons tuning over theta cycle for each morphological class over a single theta cycle (middle). Experimental validation of phase-locking against *in vivo* recordings (right). C. Spiking raster plots. SP\_PC cell spiking (top panel); LFP theta rhythm (trace above plot); interneuron spiking (bottom panel). D. Intracellular traces from morphological cell types (left) and validation against *in vivo* recordings. Stimulus panels B-D: 0.4 Hz SC mean spiking frequency and 8 Hz signal modulation.

396 For the same neuronal classes in the model, we compared their somatic membrane potentials and mean

397 firing rates to experimental data. Pyramidal cell spiking was closely aligned to theta LFP rhythm  
398 although individual neurons did not spike at every cycle (Figure 7C top). SP\_Ivy showed a similar  
399 pattern to SP\_PC while other types of interneuron participated more sporadically (Figure 7C bottom).  
400 Intracellular voltage traces for pyramidal and ivy cells were also similar albeit with ivy cell firing slightly  
401 later and overlapping with other types of interneurons (Figure 7D left). Mean firing rates during theta  
402 were generally lower than observed *in vivo* except for ivy cells, which were a close match; SP\_AA,  
403 BS, and BC (CCK+ and PV+) were well below empirical expectations (Figure 7D right). Theta  
404 modulated the amplitude of pyramidal cell membrane potential by 1.57-7.34 mV (for 0.1-0.4 Hz SC  
405 axon frequency), consistent with the *in vivo* range (2-6 mV, Ylinen et al., 1995). When we compared  
406 model population synchrony during theta oscillations with *in vivo* data (Csicsvari et al., 1998), we found  
407 that the percentage of SP\_PC spiking was a poor match around the theta trough (0°) but was a better  
408 match around theta peak (180°), while fast-spiking SP\_PVBC and to a lesser degree SP\_AA were  
409 under-recruited (Figure S24). Overall, for this stimulus the pyramidal-interneuron theta phase order  
410 suggests that intrinsic inhibition was activated more powerfully by recurrent than by afferent excitation.  
411 Altogether, for the CA3 input, the model does not generate theta at *in vivo*-like calcium levels but does  
412 reliably at *in vitro*-like ones. However, the phase analysis suggests that the mechanism is different from  
413 what is observed *in vivo*.

#### 414 **Medial septum input**

415 *In vivo* evidence points to a fundamental role of the medial septum (MS) in theta generation (Colgin,  
416 2013). To model the MS input, we (i) set an *in vivo* extracellular calcium concentration (1 mM), (ii) ap-  
417 plied a tonic depolarizing current (% of rheobase current) to all neurons to represent *in vivo* background  
418 activity, (iii) introduced an additional current to mimic the depolarizing effect of an arrhythmic release  
419 of ACh from the cholinergic projection (see ACh section), and (iv) applied a theta frequency sinusoidal  
420 hyperpolarizing current stimulus only to PV+ CA1 neurons to represent the rhythmic disinhibitory action  
421 of the GABAergic projection (Hangya et al., 2009; Sun et al., 2014; Müller and Remy, 2018; see Figure  
422 8A). Due to uncertainty regarding some of these factors, we examined the response over a wide range  
423 of physiological conditions (see Methods). Since this required a high number of simulations, we decided  
424 to use the cylinder circuit.

425 Prior to the onset of the disinhibitory stimulus ("MS OFF"), the global tonic depolarization resulted  
426 in weak, irregular beta-band LFP activity in CA1 but after its onset ("MS ON"), it induced a strong  
427 and sustained, regular theta oscillation matching the frequency of the hyperpolarizing stimulus (Figure  
428 8B). For disinhibitory modulation amplitude of 0.2 nA, the LFP waveforms generated were close to  
429 symmetrical (mean asymmetry index =  $0.25 \pm 0.11$ ; see Figure S25). Over a range of ACh concentra-  
430 tions and tonic depolarization levels, this theta rhythm was robust, narrow banded (Figure 8B,C), and  
431 generated by a highly regular current source restricted to SP (Figure 8E). Higher ACh concentrations,  
432 while slightly reducing theta-band power, reduced the level of beta-band activity (Figure 8C). Increased  
433 levels of tonic depolarization enhanced both theta harmonics and higher frequency components (Figure  
434 8C,D). We observed that theta-band power was more dependent on the amplitude of the disinhibitory  
435 oscillation than on either ACh concentration or tonic depolarization level (Figure 8B,F). Therefore, we  
436 found MS-mediated disinhibition could strongly induce CA1 theta oscillations.

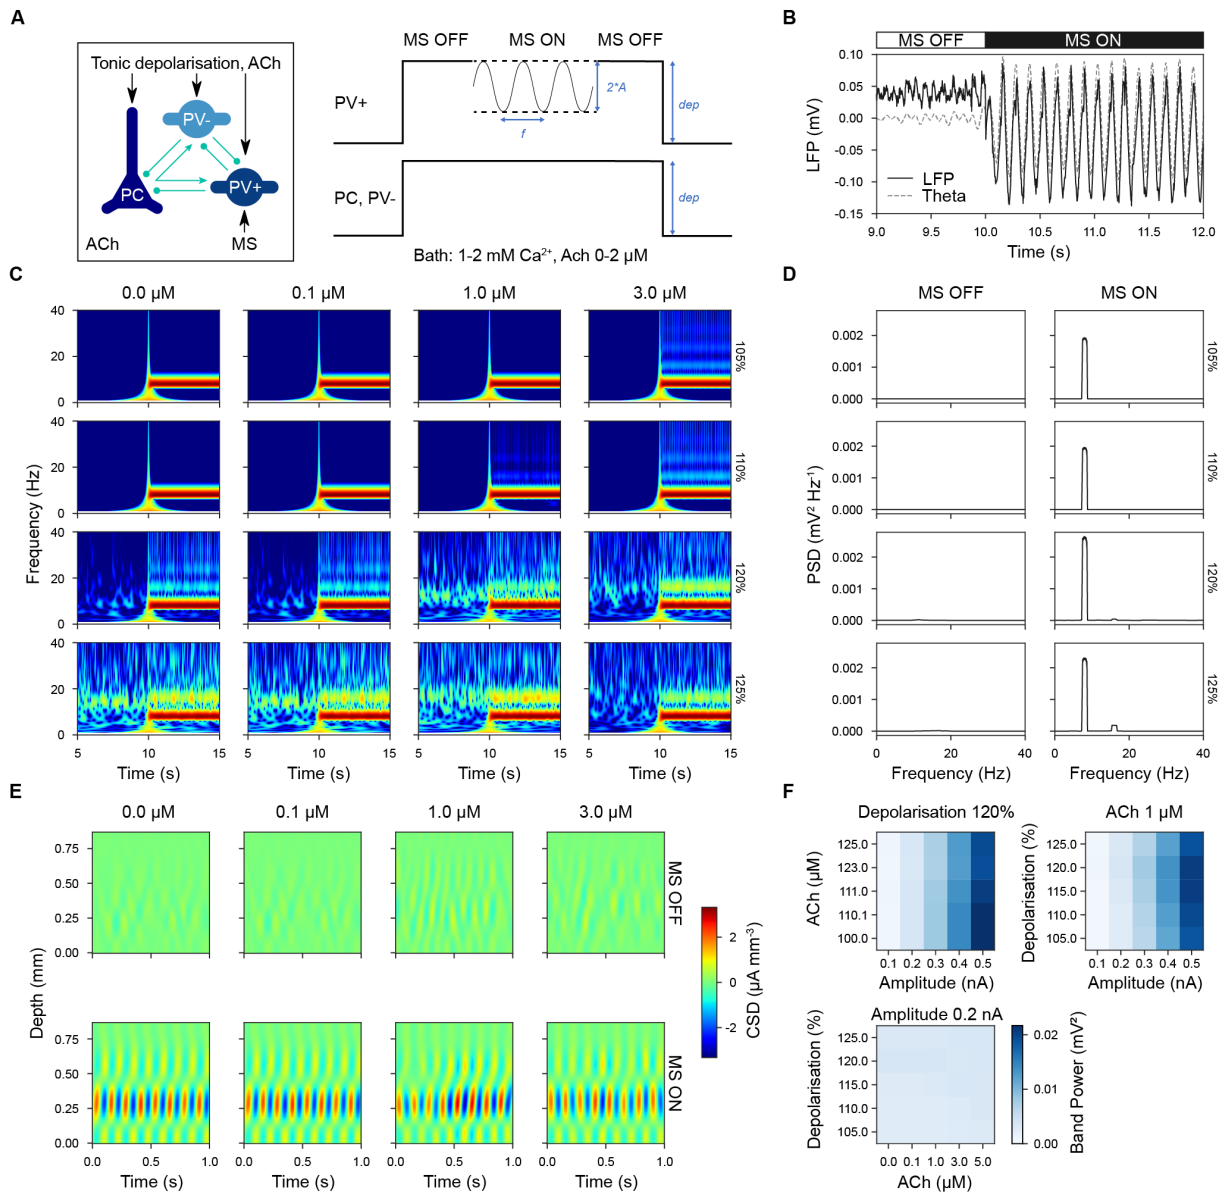

**Figure 8: Medial septum (MS) disinhibition of parvalbumin-positive (PV+) interneurons induced theta oscillations in CA1.** A. Simulation setup. All neurons received a tonic depolarizing current in the presence of ACh ("MS OFF" condition). For a given period an oscillatory hyperpolarizing current was injected into PV+ interneurons only ("MS ON" condition). B. Example of simulation before and after the onset of disinhibition. LFP in black and theta-filtered LFP in grey. C. Spectrogram for a range of ACh concentrations (top labels) and tonic depolarization levels (right labels). D. Power spectral density (PSD) across different levels of tonic depolarization (right labels) with and without disinhibition. E. Current source density (CSD) analysis across different ACh concentrations (top labels), with and without disinhibition. F. Theta band power as a function of the amplitude of oscillatory hyperpolarizing current, ACh concentration, and level of tonic depolarization. B-E: Stimulus disinhibitory modulation amplitude of 0.2 nA.

437 During theta oscillations, the phase of spiking of different neuronal classes here divided into two main  
 438 groups that were in anti-phase with each other (see Figure 9). As the level of tonic depolarization  
 439 increased, more phase-locked cells were detected (Figure 9A) and only above 110% depolarization



440 (where 100% represents the depolarization necessary to reach spike threshold) were there a sufficient  
441 number of active interneurons to discern this dual grouping. Increasing ACh concentration tended to  
442 weaken pyramidal phase locking (Figure 9A). For example, at 120% depolarisation and 1  $\mu$ M ACh, the  
443 firing of SP\_PC, SP\_Ivy, and SP\_CCKBC cells was broadly tuned around the theta trough and rising  
444 phase, while the firing of SP\_AA, BS and SP\_PVBC neuron was more narrowly tuned around the peak  
445 of the theta rhythm (Figure 9B left). Neurons with significant phase locking matched this pattern but  
446 were even more narrowly tuned (Figure 9B middle). The phase locking of SP\_AA, SP\_Ivy and PC  
447 closely matched *in vivo* recordings (see Table S23) but SP\_BS and BC (CCK+ and PV+) were by  
448 comparison more than 90 degrees out of phase (Figure 9B right).



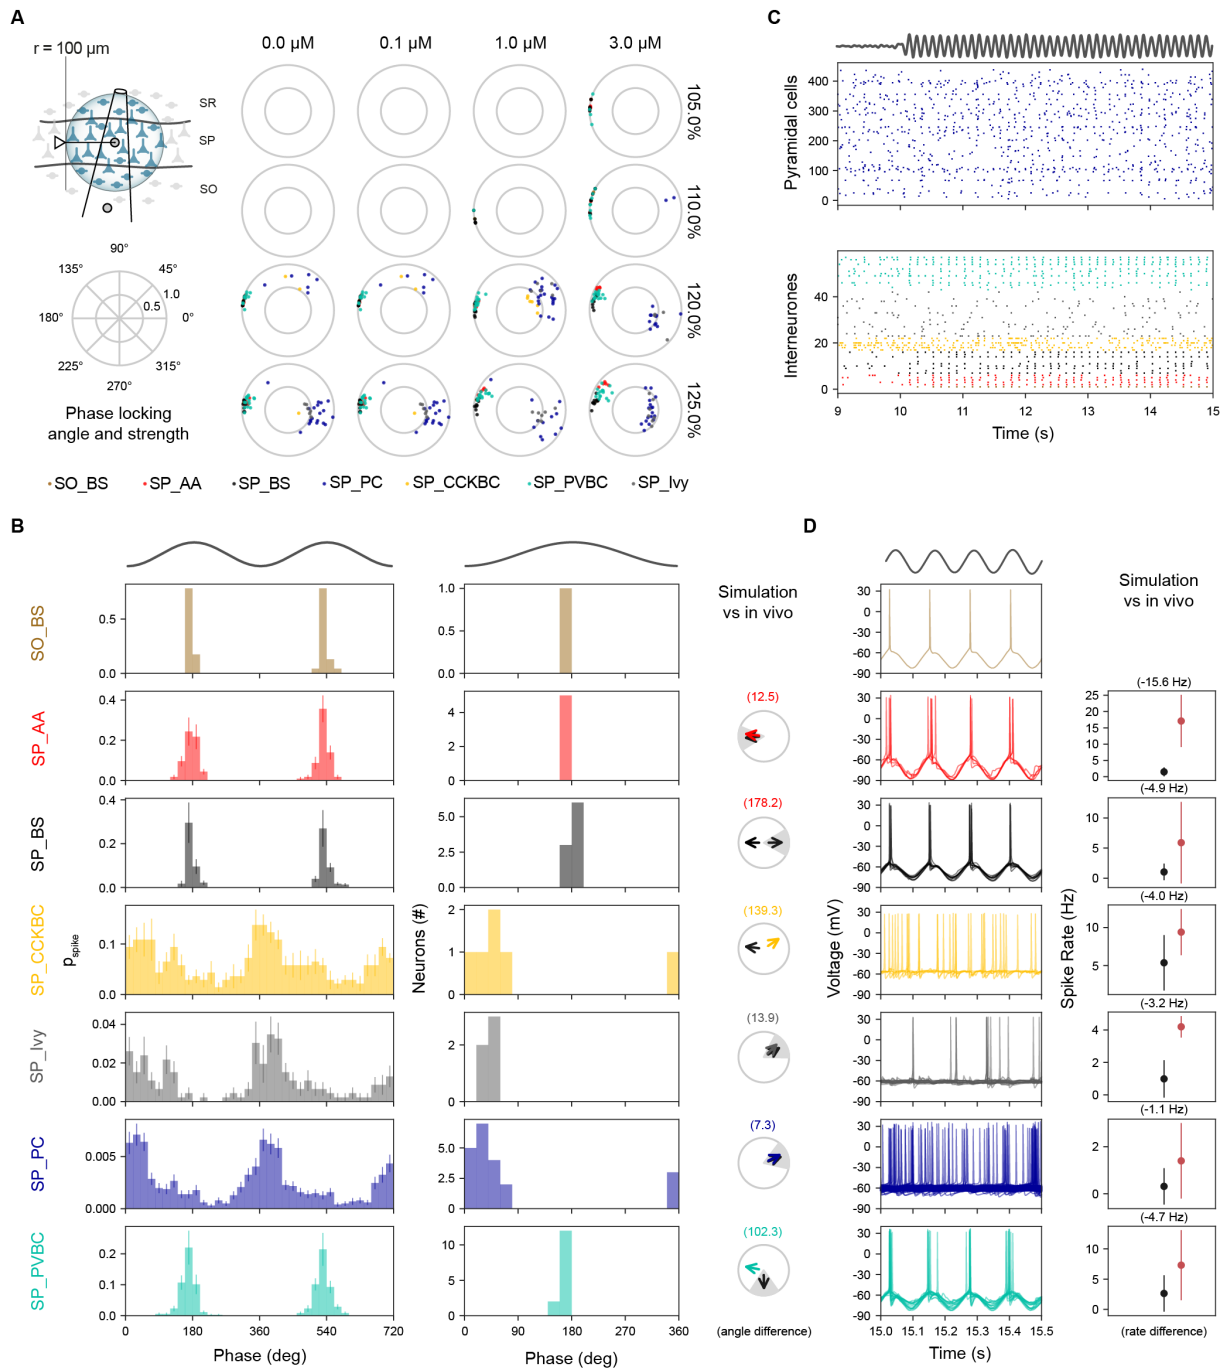

**Figure 9: Medial septum (MS) disinhibition induced anti-phase modulation of CA1 neurons during theta cycles.** A. Neurons for analysis were selected within  $100 \mu\text{m}$  radius of the stratum pyramidale electrode location (top left). Phase locking angle and strength for range of ACh concentration (columns) and levels of tonic depolarization (rows, where 100% represents the spike threshold) for modulation amplitude of  $A = 0.2 \text{ nA}$ . B. Phase Modulation. Spike discharge probability of all neurons grouped by morphological type (left). Phase-locked neurons tuning over theta cycle for each morphological class over a single theta cycle (middle). Experimental validation of phase locking against *in vivo* recordings (right). C. Spiking raster plots. SP\_PC cell spiking (top panel); LFP theta rhythm (trace above plot); interneuron spiking (bottom panel). Disinhibition is switched on ("MS ON") at time 10s. D. Intracellular traces from morphological cell types (left) and validation against *in vivo* recordings. B-D: Stimulus disinhibitory modulation amplitude of  $A = 0.2 \text{ nA}$ ,  $1 \mu\text{M}$  ACh and tonic depolarisation 120%.

449 The voltage traces and rate of spiking during theta oscillations for different neuronal types was also  
450 grouped. While SP\_PC did not spike on every theta cycle their firing appeared weakly modulated by  
451 theta (Figure 9C top). Whereas for interneurons, SP\_AA, BS, and SP\_PVBC spiked tightly for most  
452 cycles, ivy cells spiked more rarely and SP\_CCKBC more tonically (Figure 9C bottom). Intracellular  
453 voltage traces for SP\_AA, BS, and SP\_PVBC showed they spiked tightly on the rebound from the release  
454 of the hyperpolarizing stimulus, whereas SP\_PC and other interneurons lacking this were less reactive  
455 to theta (Figure 9D left). Notably, all neurons spiked at a lower average rate than *in vivo* recordings  
456 (Klausberger et al., 2003, 2004; Klausberger, 2005; Fuentealba et al., 2008) (Figure 9D right). The  
457 population synchrony of SP\_PC with theta trough was consistent with *in vivo* data (Csicsvari et al.,  
458 1998) for a range of disinhibitory stimulus amplitudes whereas for fast-spiking interneurons like SP\_AA  
459 and SP\_PVBC, synchronization with theta peak only occurred with lower stimulus amplitudes (Figure  
460 S26). Taken together, the MS-mediated disinhibition entrained theta oscillations under *in vivo*-like  
461 conditions, creating a diversity of firing phases between interneuron classes, close to what has been  
462 observed experimentally.

463 In summary, we used the reference model to investigate several possible mechanisms for theta oscillations.  
464 For intrinsic mechanisms, we found that spontaneous synaptic release and random afferent synaptic  
465 barrage did not induce detectable theta oscillations in the model, while tonic depolarization could  
466 induce a variable and unstable theta oscillation at 10-12 Hz. For extrinsic mechanisms, both CA3 and  
467 MS input induced a stable and stronger theta oscillation but in different ways, where MS disinhibition  
468 was more compatible with *in vivo* data.

### 469 2.2.2 Other Frequencies

470 Next we asked whether the reference circuit was capable of propagating gamma oscillation using the  
471 commonly used *in vitro* experimental paradigm of inducing them using bath carbachol (CCh) (Bianchi  
472 & Wong, 1994; J. H. Williams & Kauer, 1997; Fisahn et al., 1998; Fellous & Sejnowski, 2000). Specif-  
473 ically, we replicated the setup of Zemankovics et al. (2013), where the authors added CCh to generate  
474 oscillations in CA3, which were transmitted to CA1 via SC. The simulation conditions were tailored to  
475 these *in vitro* experiments (i.e. 300  $\mu\text{m}$ -thick slices, 2 mM extracellular  $\text{Ca}^{2+}$ , 2 mM extracellular  $\text{Mg}^{2+}$ ,  
476 10  $\mu\text{M}$  ACh). We matched the shape and frequency of the input stimulus reported by Zemankovics et al.  
477 (2013) and followed the same LFP analysis methodology. We observed that gamma oscillatory SC input  
478 could entrain the entire CA1 network of the model slice to oscillate at the driving frequency (31 Hz)  
479 (Figure S27A). As well as inducing oscillations in CA3, *in vitro* CCh could alter the response of CA1  
480 neurons to the SC input. Thus, to quantify the effect of CCh on CA1, we repeated the simulation  
481 without the influence of CCh. SC inputs, ranging from 15,000 to 100,000 stimulated fibers, were able  
482 to induce strong gamma oscillation in the absence of CCh. However, CCh increased the number of  
483 inputs needed for stable gamma oscillation, probably due to its weakening effect on synapses (Figure  
484 S27B). Therefore, at least for this experimental setup, the circuit was capable of propagating gamma  
485 oscillations.

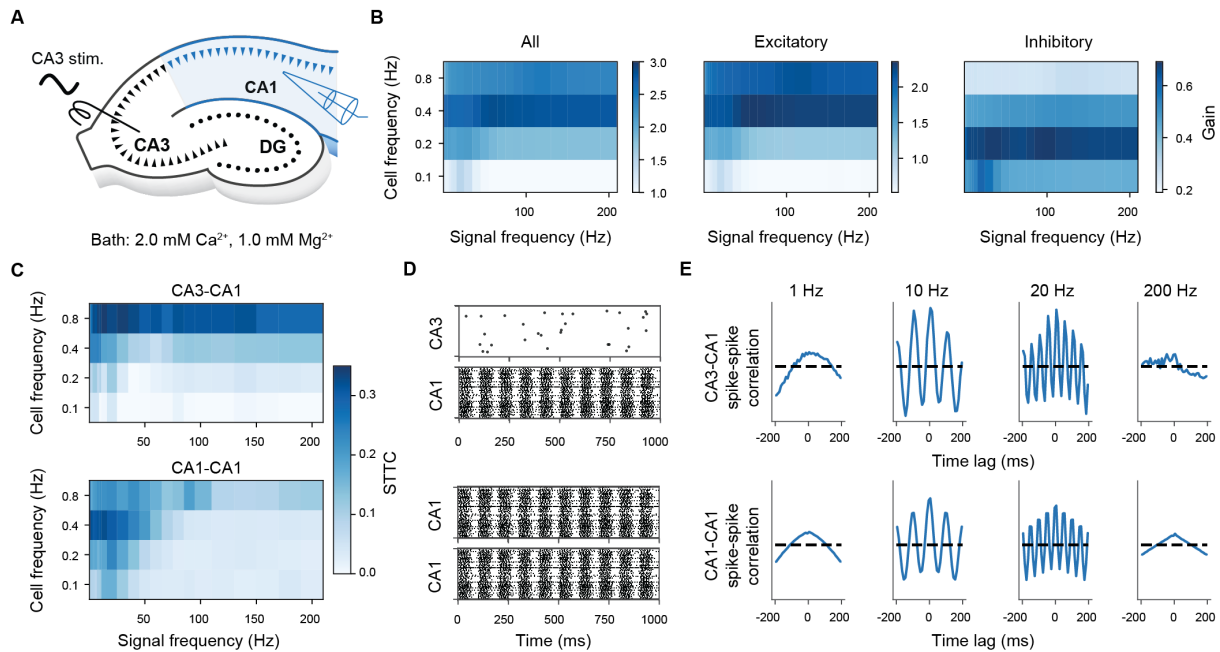

**Figure 10: Intermediate frequencies propagate more efficiently through SC.** A. *In silico* experimental setup. B. Ratio between the number of CA1 and CA3 spikes as a function of input cell and signal frequencies. We considered all CA1 neurons (left), CA1 PCs (center) and CA1 interneurons (right). C. Heatmaps representing the computed STTC values as a function of input cell and signal frequencies, for CA3-CA1 and CA1-CA1 neurons. D. Examples of CA3 and CA1 spike train (cell frequency of 0.4 Hz, signal frequency of 10 Hz). 100 random CA3 neurons (i.e., SC fibers) and CA1 neurons are selected for clarity. The same neurons are used to compute the STTC and spike-spike correlations (panels D-E). E. Spike-spike normalized correlation histograms for four signal frequencies (cell frequency of 0.4 Hz), for CA3-CA1 and CA1-CA1 neurons.

486 Finally, we investigated how the reference circuit behaved across a much wider range of input frequencies.  
 487 Because the nature of the input was less clear across this range, we used a sinusoidal modulated stimulus.  
 488 In particular, we extended SC input for a wider range of cell (0.1-0.8 Hz) and modulation frequencies  
 489 (0.5-200 Hz) and measured the corresponding input-output (I-O) gain and spike-spike correlation (Figure  
 490 10A). We found I-O gain was not uniform but depended on both cell and signal input frequencies (Figure  
 491 10B). The I-O responses of PC and interneurons were different, with interneuron gain greater at lower  
 492 cell frequencies compared to PCs (Figure 10B). The strongest overall CA1 gain was obtained with a  
 493 mean CA3 frequency of 0.4 Hz. The spike-spike correlation also depends on both cell and signal input  
 494 frequencies (Figure 10C-E upper). In the case of input cell frequency of 0.4 Hz, we found CA1 spiking  
 495 activity was strongly correlated for delta- to lower gamma-band input signal frequencies (i.e. between 1  
 496 and 30 Hz) but weaker outside this range. Internal CA1-CA1 spike correlation was similar but spanned  
 497 higher frequencies of the gamma-band (Figure 10C-E lower). Therefore, the model is able to propagate  
 498 oscillations better within the delta- to low gamma-band range.

## 499 **3 Discussion**

### 500 **3.1 Main summary**

501 This study presents the reconstruction and simulation of a full-scale, atlas-based reference model of the  
502 rat hippocampal CA1 region driven by community data and collaboration. We extended and improved  
503 the framework of Markram et al. (2015) to curate and integrate a wide variety of anatomical and  
504 physiological experimental data from synaptic to network levels. We then systematically applied multiple  
505 validations for each level of the model. We augmented the resulting highly detailed intrinsic CA1 circuit  
506 with a reconstruction of its main input from CA3 and a phenomenological model of neuromodulation  
507 by acetylcholine. Importantly, the reference circuit model is, by definition, general: it was not created  
508 to reproduce a narrow spectrum of use cases but to be capable of addressing a wide range of research  
509 questions. To demonstrate its general utility, we were able to simulate different scales of circuits and  
510 investigate the generation and transmission of neuronal oscillations, with particular emphasis on theta  
511 rhythm, for a variety of stimulus conditions.

### 512 **3.2 Previous work and limitations**

513 While a full review of the many hippocampal circuit models is beyond the scope of the paper, we  
514 focus on the progression in both the size and level of detail of large-scale multiscale models of the rat  
515 hippocampus during the last three decades (for a comparison of their key features with the present  
516 model, see Table S2). These biologically realistic models aim to explain the complex dynamics of  
517 hippocampal activity, in particular the generation and control of rhythmic responses. However, all these  
518 models, including the one reported here, are incomplete descriptions of a hippocampal region or regions  
519 because of the paucity or even absence of some types of data necessary to constrain them. Moreover, the  
520 results of these models are difficult to compare because of fundamental differences in their composition,  
521 organization, and underlying assumptions. There is no commonly agreed-upon set of validations with  
522 which to benchmark a circuit model against experimental data.

523 The current model stands out by realistically constraining neurons and their connectivity by the highly  
524 curved shape of CA1 rather than by relying on an artificial space as found in other contemporary models.  
525 Additionally, it reflects both short-term plasticity and spontaneous synaptic release, well-established  
526 characteristics of central nervous system synapses. In addition, the morphologies and electrical properties  
527 of model neurons here are not just copies of the same class exemplars but their properties have been  
528 systematically varied to better capture the diverse nature of neuronal circuits and their responses to  
529 stimulation. However, compared with Bezaire et al. (2016), some elements are still missing from the  
530 current model such as neurogliaform cells, which did not exist in our available dataset, and GABA<sub>B</sub>R  
531 which are not included in our simulations.

532 Nonetheless, the current model includes the perforant path-associated and trilaminar interneurons, which  
533 were absent from all previous models. In addition, we modeled the NMDA synaptic currents observed in  
534 both hippocampal pyramidal cells and interneurons (with specific NMDAR conductance, rise and decay  
535 time constants for each pathway) that are absent in the model of Bezaire et al. (2016). Furthermore, the  
536 connectivity algorithm used for the current model generates an intrinsic connectome with more realistic  
537 high-order statistics than the more prescriptive approach used in the Bezaire et al. (2016) model (see

538 Giacomelli et al. (2021) for the analysis). Unlike Yu et al. (2020), we did not replicate the topography  
539 of the afferent projections, which may play a role in patterning the circuit response, but did model the  
540 projections and circuit at a full rather than reduced scale. Overall, further improvement to our model  
541 requires additional experimental data.

542 While we incorporated key features distributed among previous models into a single, general model (see  
543 Table S2), it is important to recognise that our aims and approach were different, representing a step  
544 change in hippocampal modeling. The intention of the framework was first to curate and integrate  
545 community data into the model, preserving provenance for reproducibility, in a way that would allow  
546 the addition of new datasets from the large hippocampal community. Re-using these datasets and then  
547 making them publicly available through the hippocampushub.eu supports the 3R principles (replace,  
548 reduce, refine) for the reduction of animal experiments. Each circuit component and the final model  
549 was then systematically validated in an open and transparent way to a degree not previously attempted  
550 by other research groups. To increase the realism and utility of simulation experiments, we sought to  
551 approximate experimental conditions (e.g. slice thickness and location, bath calcium, magnesium and  
552 acetylcholine concentrations, and recording temperature) and to increase the capability to manipulate  
553 and record from the model (e.g. enable spontaneous synaptic release, alter connectivity, estimate  
554 extracellular LFP signals, and apply a variety of stimuli). In short, the aim was to offer a more realistic  
555 yet scalable and sustainable approach to model brain regions at full scale.

### 556 **3.3 Lessons learned**

557 In the context of a community effort, the process of curating and integrating available data to reconstruct  
558 a brain region and replicating the experimental conditions *in silico* proved instructive in a number of  
559 ways. First, assembling the components to reconstruct a brain region reveals surprising gaps in the  
560 available data and knowledge. Notably, for instance, while Schaffer collateral input to CA1 has received  
561 many decades of attention, especially in terms of long-term plasticity, we found the basic information  
562 needed to model this pathway quantitatively, was limited. To address this gap, we devised a multi-  
563 step algorithm constrained by the data that were available to parameterize these connections. Second,  
564 when data was available it often required further work before it could be used in the model. While an  
565 open-source rat hippocampal atlas (Ropireddy et al., 2012) was crucial to reconstruct CA1, the original  
566 volumetric reconstruction was too noisy for our purposes and required additional processing to give  
567 smooth layering. This smoothness was necessary to place and orient morphologies accurately in the  
568 atlas in relation to the layers. If the morphology was incorrectly placed or oriented, this had a knock-on  
569 effect for how the circuit was connected. Similarly, the completeness of morphological reconstructions  
570 also affected connectivity. For these reasons, some cell types in our available dataset could not be used in  
571 the circuit model, sacrificing a small amount of cell type diversity in favor of completeness. Third, setting  
572 up simulations to reproduce the desired experimental conditions required careful attention. We offer  
573 two examples from our research. When reproducing the I-O gain of SC afferent input reported in Sasaki  
574 et al. (2006), we initially sampled all neurons in the model slice to plot to the I-O curve. However,  
575 the result was poor. We later resolved this by following their experimental sampling of a subset of  
576 neurons with which we could closely match the empirical curve. When reproducing MS-induced theta  
577 oscillations, we initially simulated under default conditions of extracellular calcium concentration at 2

578 mM, resulting in theta oscillations that occurred episodically and only for a restricted parameter regime.  
579 However, when we lowered the extracellular calcium to *in vivo* levels (1 mM), sparser activity led to  
580 more robust and stable theta oscillations.

### 581 **3.4 A community-driven modeling approach**

582 This approach offers important features that make an attractive case for adoption by the wider hip-  
583 pocampus community. First, anchoring a circuit model in the volumetric space of a brain region atlas  
584 makes mapping experimental data for data integration, validation, and prediction easier than for more  
585 abstract spaces and permits investigations at different scales, e.g. a brain slice cut at an arbitrary angle.  
586 The Allen Brain Atlas has demonstrated the advantages of registering community experimental data in  
587 a common reference atlas (Wang et al., 2020). Extending this principle, a common framework appears  
588 advantageous for modeling as well. Second, the model components, validations, and circuit are openly  
589 available through a dedicated portal ([hippocampuspushub.eu](http://hippocampuspushub.eu)) to maximize transparency and reproducibility.  
590 We allow the community to examine how the reference circuit model was built, validated, simulated, and  
591 analyzed. We conceived the model to be adopted by the community, extended and improved. Third,  
592 while the traditional approach of constructing circuits for a specific use-case has short-term advantages  
593 for demonstrating proof-of-concept, in the long-term a community reference model must be valid across  
594 a range of use-cases. Finally, this circuit model can be extended to incorporate glia and vascular systems  
595 within the same framework (Zisis et al., 2021). These systems are fundamental to regulating neuronal  
596 activity and communication in health and disease (Giaume et al., 2010) and could be adapted to make  
597 atlas-based circuit models much more realistic embodiment of brain regions.



## 598 4 Methods

### 599 4.1 Experimental procedures

600 In this study, we used two datasets for single neuron morphological reconstructions and electrophysio-  
601 logical recordings from the region CA1: Sprague Dawley rat and Wistar rat. Both datasets also include  
602 the reconstruction of the layers that were used to estimate the layer thicknesses (see Layers Section)  
603 and guide the cell placement (see Soma placement Section). Note that, while the Wistar rat dataset  
604 also includes electrophysiological recordings, we did not use them for this model. The experimental  
605 procedures have been previously described in R. Migliore et al. (2018), but are summarized below.

#### 606 4.1.1 Sprague Dawley rat dataset

607 All procedures were carried out according to the British Home Office regulations (Animal Scientific Pro-  
608 cedures Act 1986). Hippocampal slices were obtained from young adult rats (Sprague Dawley, 90-180g)  
609 as previously described (Ali et al., 1998; Ali et al., 1999; Pawelzik et al., 1999; Hughes et al., 2000;  
610 Thomson et al., 2000; Pawelzik et al., 2002; Mercer et al., 2006; Ali & Thomson, 2008; Fuentealba  
611 et al., 2008). Briefly, following deep anesthesia with euthatal solution, young adult rats (Sprague  
612 Dawley, 90-180 g) rats were perfused transcardially with ice-cold modified artificial cerebrospinal fluid  
613 containing in mM: 248 sucrose, 25.5  $NaHCO_3$ , 3.3 KCl, 1.2  $KH_2PO_4$ , 1  $MgSO_4$ , 2.5  $CaCl_2$ , 15  
614 D-glucose, equilibrated with 95%  $O_2$ /5%  $CO_2$ . 450 to 500  $\mu m$  coronal sections were cut, transferred  
615 to an interface recording chamber and maintained at 34 – 36°C in modified ACSF solution for 1 hour  
616 and then in standard ASCF (in mM: 124 NaCl, 25.5  $NaHCO_3$ , 3.3 KCl, 1.2  $KH_2PO_4$ , 1  $MgSO_4$ ,  
617 2.5  $CaCl_2$ , and 15 D-glucose, equilibrated with 95%  $O_2$ /5%  $CO_2$ ) for another hour prior to starting  
618 electrophysiological recordings. Single intracellular recordings were made using sharp microelectrodes  
619 (tip resistance, 90-190  $M\Omega$ ) filled with 2% biocytin in 2M  $KMeSO_4$  under current-clamp (Axoprobe;  
620 Molecular Devices, Palo Alto, CA). Electrophysiological characteristics of the recorded neurons were  
621 obtained from voltage responses to 400 ms current pulses between -1 and +0.8 nA and recorded with  
622 pClamp software (Axon Instruments, USA).

623  
624 Following recording and biocytin filling, slices of 450-500  $\mu m$  were fixed overnight [4% paraformaldehyde  
625 (PFA), 0.2% saturated picric acid solution, 0.025% glutaraldehyde solution in 0.1 M phosphate buffer)]  
626 as previously described (Hughes et al., 2000; Economides et al., 2018). Slices were then cut in 50-60  
627  $\mu m$  sections, cryoprotected with sucrose, freeze-thawed, incubated in 1%  $H_2O_2$  and then in 1% sodium  
628 borohydride ( $NaBH_4$ ). Slices were incubated overnight in ABC (Vector laboratories) and then in DAB  
629 (3, 3' diaminobenzidine, Sigma) to reveal the morphology of the recorded neurons. Following washes,  
630 sections were post-fixed in osmium tetroxide ( $OsO_4$ ), dehydrated, cleared with propylene oxide, mounted  
631 on slides (Durcupan epoxy resin, Sigma) and cured for 48 h at 56°C. For immunofluorescence staining,  
632 slices were incubated in 10% normal goat serum after incubation with  $NaBH_4$ . Sections were then  
633 incubated overnight in a primary antibody solution containing mouse anti-PV (Sigma), rabbit anti-PV  
634 (Baimbridge & Miller, 1982) or mouse anti-gastrin/CCK (CURE, UCLA) made up in ABC and then  
635 in a solution of secondary antibodies (Avidin-AMCA, FITC and anti-rabbit Texas Red) for 3 hours.  
636 Following fluorescence visualization, slices were incubated in ABC, DAB and  $OsO_4$  prior to dehydration



637 and mounting as described above. All neurons were then reconstructed in 3D using a NeuroLucida  
638 software (MBF Bioscience) and a 100X objective as previously described (Economides et al., 2018).

#### 639 **4.1.2 Wistar rat dataset**

640 The project was approved by the Swiss Cantonal Veterinary Office following its ethical review by the  
641 State Committee for Animal Experimentation. All procedures were conducted in conformity with the  
642 Swiss Welfare Act and the Swiss National Institutional Guidelines on Animal Experimentation for the  
643 ethical use of animals. Hippocampal slices were obtained from young adult rats (Wistar, postnatal 14-23  
644 days) as previously described (Markram et al., 2015; R. Migliore et al., 2018). In brief, *ex vivo* coronal  
645 preparations (300  $\mu\text{m}$  thick) were cut in ice-cold aCSF (artificial cerebro-spinal fluid) with low  $\text{Ca}^{2+}$  and  
646 high  $\text{Mg}^{2+}$ . The intracellular pipette solution contained (in mM) 110 potassium gluconate, 10 KCl, 4  
647 ATP-Mg, 10 phosphocreatine, 0.3 GTP, 10 HEPES and 13 biocytin, adjusted to  $290 \pm 300$  mOsm/Lt  
648 with D-mannitol ( $2 \pm 35$  mM) at pH 7.3. Chemicals were from Sigma Aldrich (Stenheim, Germany)  
649 or Merck (Darmstadt, Germany). A few somatic whole cell recordings (not used for this model) were  
650 performed with Axopatch 200B amplifiers in current clamp mode at  $34 \pm 1$  °C bath temperature.

651

652 The 3D reconstructions of biocytin-stained cell morphologies were obtained from whole-cell patch-  
653 clamp experiments on 300  $\mu\text{m}$  thick brain slices, following experimental and post-processing procedures  
654 as previously described (Markram et al., 1997). The neurons that were chosen for 3D reconstruction  
655 were high contrast, completely stained, and had few cut arbors. Reconstruction used the NeuroLucida  
656 system (MicroBrightField Inc., USA) and a bright-field light microscope (DM-6B, Olympus, Germany)  
657 at a magnification of 100x (oil immersion objective, 1.4-0.7 NA). The finest line traced at the 100x  
658 magnification with the NeuroLucida program was 0.15  $\mu\text{m}$ . The slice shrinkage due to the staining  
659 procedure was approximately 25% in thickness (Z-axis). Only the shrinkage of thickness was corrected  
660 at the time of reconstruction.

#### 661 **4.2 Morphological classification**

662 We classified the morphologies into one of 12 different morphological types (m-types) based on the layer  
663 containing their somata and their morphological features. For the classification, we adopted three main  
664 assumptions. 1) Several subtypes of PCs have been described (Baimbridge & Miller, 1982; Bannister &  
665 Larkman, 1995; Deguchi et al., 2011; Mizuseki et al., 2011; Slomianka et al., 2011; Graves et al., 2012;  
666 Lee et al., 2014; Malik et al., 2016), but for simplicity we consider the pyramidal cells as a uniform  
667 class (SP\_PC or simply PC). 2) SP\_PVBC and SP\_CCKBC were classified as two separate m-types.  
668 The two types of basket cells can be distinguished by biochemical markers and electrical properties, and  
669 they show different densities and connectivity (Bezaire & Soltesz, 2013). On the contrary, there is no  
670 strong evidence for differences in their morphologies and the small number of examples in our possession  
671 (3 SP\_PVBCs, 1 SP\_CCKBCs) prevented us from conducting any systematic classification. While we  
672 could have pulled the two cell types into one m-type, we kept them separated for the sake of simplicity.  
673 3) We created supersets of m-types based on their principal biochemical marker. In particular, we  
674 defined PV+ cells as SP\_PVBC, SP\_BS, SP\_AA, CCK+ cells as SP\_CCKBC, SR\_SCA, SLM\_PPA  
675 and SOM+ (somatostatin) cells as SO\_OLM, SO\_BS, SO\_BP, SO\_Tri. When the layer is not specified

676 (e.g., BS), we meant all the neurons of this type regardless their soma location.

### 677 **4.3 Morphology curation**

678 We curated the morphological reconstructions extensively prior to insertion in the network model. First,  
679 we translated the reconstructions to have their somas centered at coordinates (0,0,0). We reoriented  
680 the reconstructions so that their x, y, and z axes coincided respectively with the transverse, radial, and  
681 longitudinal axes they followed in the tissue. We considered the cells to be substantially complete, with  
682 only a few cuts, so we have not applied any corrections for cuts (Markram et al., 2015). The only  
683 exception is the PC axon. One particular reconstruction has a relatively long axon (3,646  $\mu\text{m}$ ) that  
684 spans 1,325  $\mu\text{m}$  along the transverse axis. We assumed this axon to be relatively complete within the  
685 CA1 and we used it as a prototype for all the PCs. Validation of the number of synapses per connection,  
686 bouton density, and connection probability showed that this assumption is reasonable (see Building CA1  
687 Section). A subsequent cloning procedure (see Section Morphology library Section) guaranteed that all  
688 the PC axons are unique. We removed two pyramidal cells due to the complete absence of an axon  
689 since at least the axon initial segment (AIS) needs to be present to create electrical models.

690 We applied a series of corrections as described in Markram et al. (2015). In brief, to comply with  
691 the NEURON and CoreNEURON standards, we repaired the reconstructed morphologies using NeuroR  
692 (Anwar et al., 2009, Table 1). In particular, we used this tool to remove unifurcations of dendrites, fix  
693 neurites whose type changes along its main branch, fix invalid formats of soma, and remove segments  
694 with close to zero length. We used this tool also to correct tissue shrinkage. The correction increased  
695 the neurite reach approximately 25% along the z-axis and approximately 10% along the x- and y-axes.

### 696 **4.4 Morphology library**

697 To produce morphology variants that fit well in different locations of the space, we applied scaling  $\pm 15\%$   
698 of the original reconstructions. This range was a good compromise between the need to change the  
699 size but yet to not introduce too much distortion (Markram et al., 2015). To increase morphological  
700 diversity, we applied a cloning procedure as described in Markram et al. (2015). Some clones showed  
701 a wrong distribution of axons and dendrites, and we removed them. In particular, we annotated how  
702 different parts of the morphology were positioned within the layers (see Layers Section). We used these  
703 annotations to guide the cell placement, but it was also useful to discard cells that were too distorted  
704 by cloning and had an incorrect distribution of neurons within the layers. Clones were further validated  
705 by visual inspections. For OLM cells, a scaling of  $\pm 15\%$  was not sufficient to make sure that the axon  
706 correctly targeted SLM in all dorso-ventral positions. In this case, we introduced a synthetic axon. In  
707 the reconstruction of OLM cell, a chunk of 60  $\mu\text{m}$  axon, which is placed at 85 to 145  $\mu\text{m}$  from the soma,  
708 falls in SR and it is relatively simple. To produce morphologies with about 90% to 150% (step of 5%)  
709 of the height of the original morphology, we removed the aforementioned chunk of 60  $\mu\text{m}$  axon (93%),  
710 only 45  $\mu\text{m}$  of it (95%), or added a multiple of 45  $\mu\text{m}$  (corresponding to a step of 5%) synthetic axon  
711 within SR until we reached a 150% scaling.

712 After we corrected the orientation of the initial set of reconstructions, the cloning procedure changed  
713 the branch lengths and rotations, which may have resulted in a change in the main orientation of the

714 cells. Based on visual inspection, the effect on short neurites was negligible. In the case of PCs, the  
715 axon is relatively longer and has a clear orientation (S. Yang et al., 2014). In this case, the cloning may  
716 significantly alter the orientation of the axon, and this may result in a wrong placement in the circuit (see  
717 Soma placement Section). To avoid this problem, we renormalized the orientation of the cloned PCs. In  
718 particular, we used principal component analysis (PCA) to first determine the principal axis of all axonal  
719 points in each cloned morphology. Next, we used the direction of the principal axis to rotate the caudal  
720 portion of the arbor onto the x-axis so all pyramidal axon arbors were aligned in the same direction.  
721 Finally, to remove an unrealistic degree of variability, we filtered out cloned morphology outliers whose  
722 width (z-axis range) was 3.3 times greater than that of the original pyramidal axon arbor from which  
723 they were derived. This filtering step rejected about 14% of all pyramidal cell cloned morphologies.

#### 724 **4.5 Morphology library validation**

725 Neuronal morphologies were validated at the end of the processing stage (cloning) by comparison of  
726 their morphological properties, as well as their topological profiles. Around 100 morphological features  
727 from dendritic and axonal neurites were extracted using the NeuroM package (Palacios et al., 2022).  
728 The median over visible spread (MVS) statistical score, defined as the ratio of the absolute value of  
729 the difference between the medians of the feature ( $\tilde{F}$ ) divided by the overall visible spread (OVS), was  
730 computed according to the following formula:

$$MVS(F) = \frac{|\tilde{F}_{P_r} - \tilde{F}_{P_c}|}{OVS(F_{P_c}, F_{P_r})} \quad (1)$$

731 to identify the difference between populations of reconstructed  $P_r$  and cloned  $P_c$  neurons for each  
732 feature  $F$ . This score is close to zero for similar populations and increases as the difference between the  
733 populations increases. Scores below 0.3 indicate good agreement between the two populations as their  
734 differences are contained within three standard deviations (STD). Note that this measurement depends  
735 on the sample size, due to the computation of the overall visible spread, which remains small if the  
736 sample size is small and therefore the MVS score increases accordingly.

737 In addition to the traditional morphometrics, the topological profiles of the original reconstructions were  
738 compared to those of the processed morphologies (repaired and cloned). The topological morphological  
739 descriptor (TMD) encodes the start and the end radial distances of each branch from the soma surface  
740 (Kanari et al., 2019). The pairs of distances (start, end) are represented in a two dimensional plane,  
741 a representation known as the persistence diagram of the neurons (Figure S4). The Gaussian kernels  
742 of these points are averaged to generate the persistence images (Figures S5 and S6). The persistence  
743 images of two populations can be subtracted to study the precise differences between datasets. Note  
744 that the robustness of average persistence images depends on the sample size of the population, when  
745 only few (less than three) cells are available these images represent a small subset of the biological  
746 population and are therefore not quantitatively reliable.

## 747 **4.6 Electrical type classification**

748 We classified the cells into different electrical types (e-types) based on their firing patterns as defined  
749 by the Petilla nomenclature (Petilla Interneuron Nomenclature Group et al., 2008). Some of the firing  
750 patterns (i.e., irregular patterns) were too rare and we excluded them.

## 751 **4.7 Morpho-electrical compositions**

752 The 154 recordings were recorded from different m-types, and we observed that each m-type can show  
753 one or more firing patterns with different probabilities. We used this information to derive the morpho-  
754 electrical type (me-type) composition (Table S4).

## 755 **4.8 Ion channels**

756 We considered a set of active membrane properties which included a voltage-gated transient sodium  
757 current, four types of potassium current (DR-, A-, M-, and D-type), three calcium channels (CaN, CaL  
758 and CaT), a nonspecific hyperpolarization-activated cation current ( $I_h$ ), two Ca-dependent potassium  
759 channels (KCa and Cagk), and a simple  $Ca^{2+}$ -extrusion mechanism with a 100 ms time constant. We  
760 based channels' kinetics on previously implemented cell models of hippocampal neurons (M. Migliore  
761 et al., 1999; M. Migliore et al., 2005; Ascoli et al., 2010; Morse et al., 2010).

## 762 **4.9 Single neuron modeling**

763 Single cell models are described in previous publications (R. Migliore et al., 2018; Ecker et al., 2020;  
764 Romani et al., 2022). In brief, we optimized cell parameters to match electrophysiological features  
765 rather than the traces directly. We extracted features using the open-source Electrophysiological Feature  
766 Extraction Library (eFEL, Table 1) or the Blue Brain Python E-feature extraction (BluePyEfe, Table 1).  
767 Initial optimizations considered only features from somatic recordings (R. Migliore et al., 2018), while  
768 a subsequent refinement included also the amplitude of the back-propagating action potential (in the  
769 apical trunk, 150 and 250  $\mu\text{m}$  from the soma) for PCs (Ecker et al., 2020).

770 We assumed channels were uniformly distributed in all dendritic compartments except  $K_A$  and  $I_h$ ,  
771 which in pyramidal cells are known to increase with distance from the soma (Hoffman & Johnston,  
772 1999; Magee, 1999). Pyramidal cells include  $K_M$  in the soma and axon (Shah et al., 2008),  $K_A$  with  
773 different kinetics in dendrites, soma and axon (Hoffman et al., 1997; M. Migliore et al., 1999),  $K_M$   
774 with a different kinetics in the soma and the axon, Na and  $K_{DR}$ , whereas they do not include  $K_D$  since  
775 the delayed spiking is not a feature observed in PCs. Given the limited knowledge of the currents in  
776 interneurons, we applied the same currents of pyramidal cells with the following exceptions. Dendritic  
777 sodium channel densities decay exponentially with distance from the soma (with a length constant of  
778 50  $\mu\text{m}$ ) based on Hu et al. (2010). We included  $K_D$  since some interneurons show delayed firing.  $K_A$   
779 has the same kinetics in somas and dendrites because there is no experimental evidence of a different  
780  $K_A$  kinetics in the dendrites of interneurons. We distinguished two types of  $K_A$  for proximal and distal  
781 dendrites (M. Migliore et al., 1999). For both pyramidal cells and interneurons, we optimized channel  
782 peak conductance independently in the different regions of a neuron (soma, axon, and dendrites).

783 We performed a multi-objective evolutionary optimization using the open source Blue Brain python

784 optimization library (BluePyOpt, Table 1) (Van Geit et al., 2016) to obtain 39 single cell models.  
785 From this set, we excluded three models because their me-types are not used in the network model  
786 (cAC\_SP\_Ivy, cAC\_SP\_PVBC, cNAC\_SR\_SCA).

## 787 **4.10 Single neuron model validations**

788 We used HippoUnit (Sáray et al. (2021), Table 1) to validate the electrical models of pyramidal neurons,  
789 specifically considering the attenuation of PSP and BPAP.

### 790 **4.10.1 PSP attenuation**

791 The PSP attenuation test evaluates how much PSP amplitude attenuates as it propagates from different  
792 dendritic locations to the soma. To get the behavior from the model, EPSC-like currents (i.e., double  
793 exponentials with rise time constant of 0.1 ms, decay time constant of 3 ms, and peak amplitude of 30  
794 pA) were injected into the apical trunk of PCs at varying distances from the soma (100, 200, 300 ±  
795 50 μm), and PSP amplitudes were simultaneously measured at the local site of the injection and in the  
796 soma. Finally, the experimental and model data points were fitted using a simple exponential function.  
797 The space constants resulting from the fitting were then reported and compared with experimentally  
798 observed data in Magee and Cook (2000).

### 799 **4.10.2 BPAP attenuation**

800 The BPAP test evaluates the strength of AP back-propagation in the apical trunk at locations of different  
801 distances from the soma. The AP is triggered by a step-current of 1 s with an amplitude for which the  
802 soma fires at ~15 Hz. The values were then averaged over distances of 50, 150, 250, 350 ± 20 μm  
803 from the soma. We measured the amplitudes of the first AP at the four different dendritic locations  
804 and compared them with experimentally observed data in Golding et al. (2001).

## 805 **4.11 Library of neuron models**

806 Optimizing all the neurons in the morphology library is computationally expensive. Following Markram et  
807 al. (2015), we minimized the problem by using Blue Brain Python Cell Model Management (BluePyMM,  
808 Table 1) which combines the morphology library with initial single cell models to produce a library of cell  
809 models. The procedure accepts a new combination if the model and experimental features are within  
810 five STD of the experimental feature. If at least one feature is greater than this range, then the new  
811 combination is excluded. This strategy also has the advantage of increasing the model variability within  
812 the experimental data. In the case of bAC-SLM\_PPA, the threshold for accepting new combinations  
813 had to be relaxed to 12 STD to obtain some valid models.

## 814 **4.12 Rheobase estimation**

815 For all the single cell model combinations, we estimated their rheobase with a bisection search until an  
816 accuracy of  $10^{-3}$  nA was reached. The spikes were recorded at the axon initial segment, and the upper  
817 bound from the last step of the search was used, to ensure cells spiked in the axon at rheobase.

## 818 **4.13 Atlas**

### 819 **4.13.1 Volume**

820 We based our annotated volume on a publicly available atlas of the CA1 region (Ropireddy et al., 2012)  
821 (<http://cng.gmu.edu/hippocampus3d/>). From the original atlas, we took all voxels labelled as CA1  
822 without maintaining their subdivisions in CA1a, CA1b, and CA1c or the four layers (Figure S8A). The  
823 original file was converted from a .csv to a .nrrd format using voxcell (Table 1).

824 We undertook a series of post-processing steps to augment the atlas with a coordinate system and vector  
825 fields that followed the three hippocampal axes (longitudinal, transverse, radial). First, a substantial  
826 smoothing operation was necessary to render the surfaces within the CA1 regular enough for subsequent  
827 manipulations. To obtain smoother surfaces, we applied a Gaussian filter together with a morphological  
828 closing filter. A few manual checks were needed to ensure isolated voxels were removed and holes from  
829 missing tissue closed. The resulting volume has a minor difference in voxel counts compared with the  
830 original atlas (-3.7%) (Figure S8B).

831 We created a mesh for the boundary surface of the CA1 using Ultraliser (Table 1) and separated it into  
832 an upper and lower shell (Figure S8C). In practice, the operation of separating the mesh into two portions  
833 is challenging and we were not able to automate it. The curved structure of the hippocampus makes  
834 automatic solutions appear incorrect upon visual inspection, particularly around the ridges. Taking the  
835 results into account, we used an OpenGL 3D graphical user interface tool (atlas-direction-vectors, see  
836 Table 1) that allows one to paint voxels on the surface of the atlas in different colors. It enabled us to  
837 manually correct the voxel selection until the shell division appeared satisfactory. Two surface meshes  
838 were then derived from the selected voxel masks.

839 We generated a polygonal centerline along the innermost voxels of the CA1 from the dorsal to the ventral  
840 extremity (Figure S8D). In detail, this process started by computing the distance transform of the input  
841 volume by assigning each voxel the distance from its closest neighbor outside of the volume. The two  
842 extremity points were used as entry and exit locations to build a stochastic chain of points following the  
843 local maxima of the distance transform. A further step generated a graph of these possible points using  
844 proximity conditions and determined the overall shortest path between the extremities using a weighted  
845 Dijkstra algorithm (Sniedovich, 2006). The resulting skeleton of the centerline was then converted into  
846 a Bézier curve (Agoston, 2004) and its continuous derivative was used to orient a series of planes. These  
847 planes are oriented perpendicularly to the curve and cut the volume of the hippocampus in slices at  
848 regular intervals (Figure S8E).

### 849 **4.13.2 Coordinates system**

850 To utilise the 3D volume fully, we created a set of parametric coordinates ranging from 0 to 1 and named  
851 them  $l$ ,  $t$ ,  $r$  as they follow the longitudinal, transverse and radial axes of the hippocampus (Figure S8G).  
852 The longitudinal coordinate was assigned first using the derivative of the centerline to sample the volume  
853 with many cross-section planes and assigning each CA1 voxel the  $[0, 1]$  value of the plane closest to it.

854 The transverse coordinate was obtained by considering the intersection between each of the cross-section



855 planes and the meshes assigned previously as the upper and lower shells of the volume. Each plane cuts  
856 the meshes creating two lines of points which were fitted to spline functions and re-sampled to yield  
857 the same number of points each having a  $[0, 1]$   $u$  coordinate. Connecting the upper to the lower line  
858 points resulted in a field of vectors that represent the natural orientation of pyramidal neurons in CA1.  
859 The transverse coordinate  $t$  was assigned from the  $u$  value of the spline points to all voxels found on  
860 the plane according to which was their closest vector (i.e. the line segment joining the upper  $usp(u)$   
861 and lower  $lsp(u)$  line points with the same  $u$ ).

862 The radial coordinate was assigned following the previous step and represents the relative  $[0, 1]$  location  
863 of each voxel of the plane along the segment connecting the  $usp(u)$  and  $lsp(u)$  points. It is defined as  
864 the ratio:

$$\frac{\|usp(p), voxel\|}{\|usp(p), lsp(p)\|} \quad (2)$$

865 In summary, all voxels lying on the same  $l$  plane are assigned a  $t$  coordinate from the upper and lower  
866 splines and later those voxels on the same  $t$  segment are assigned a relative  $r$  position along it. Taken  
867 together, these three coordinates provide a coherent system to slice and parse the volume which is more  
868 robust to surface irregularities compared to other methods. Finally, for each voxel we re-computed its  
869 direction vector from the partial derivative of the  $(l, t, r)$  coordinates with respect to  $r$  to ensure perfect  
870 correspondence between the vector field and coordinate space (Figure S8H).

### 871 4.13.3 Layers

872 Having achieved the necessary smoothing and orientations over the entire volume, we reintroduced  
873 the distinction into layers (Figure S8F) which are used to constrain cell density and the placement of  
874 specific portions of neural morphologies such as the axon and the apical dendritic tuft (Figure S9).  
875 For this reason, we used a combined approach to determine layer position: extracting thicknesses from  
876 morphology reconstructions and comparing the final layer volumes with voxel counts from the original  
877 atlas. During morphology reconstruction, we traced layer thicknesses from 23 images of pyramidal cells  
878 in CA1 slices and averaged them: SLM:  $146 \pm 27 \mu\text{m}$ , SR:  $279 \pm 40 \mu\text{m}$ , SP:  $59 \pm 15 \mu\text{m}$ , SO:  $168 \pm 30$   
879  $\mu\text{m}$ .

880 The available morphological reconstructions came from the dorsal CA1, and thus these layer thicknesses  
881 reflect the dorsal portion rather than the entire extent of the region. To reintroduce layer labels back  
882 into the atlas, we used the radial coordinate computed above to assign a uniform proportion of voxels  
883 to each layer (SLM: 0.224, SR: 0.42791, SP: 0.090, SO: 0.258). This assumption returns the same  
884 relative layer thickness throughout the volume, automatically compensating for the different CA1 shape  
885 in each location thanks to the  $[0, 1]$  parametric range. As a final step, we computed the total volumes  
886 for each layer (SLM: 3.2143, SR: 6.8421, SP: 1.5789, SO: 4.8178  $\text{mm}^3$ ).

### 887 4.14 Cell composition

888 We started by fixing the pyramidal cell (PC) density in SP to  $264.0 \pm 32.6 \times 10^3 \text{mm}^3$  (Aika et al., 1994).  
889 By combining the PC density and SP volume as extracted from the atlas ( $1.5789 \text{mm}^3$ ), we estimated



890 the total number of PCs as 416,842. To estimate the number of cells or cell densities for interneurons,  
891 we used the ratio between PCs and the different interneurons as predicted by Bezaire and Soltesz (2013)  
892 with several assumptions. In some cases, a cell type has been described as present in several layers. If  
893 we only have reconstructions of cells from one layer, we consider all the expected cells to be placed in  
894 this layer. In the case of bistratified (BS) cells, we have reconstructions from SO and SP, but Bezaire  
895 and Soltesz (2013) also described a small percentage of cells in SR. In this case, we considered the  
896 cells from SR to be placed in SP. Bezaire and Soltesz (2013) gave a rough estimation of 1,400 cells for  
897 trilaminar cells and radiatum-retrohippocampal cells together in SO. Without any other information, we  
898 considered these two cell types to have the same proportion, so we estimated the number of trilaminar  
899 cells as 700. We ignored the m-types for which we do not have at least one reconstruction. The lack  
900 of some cell types leads to a smaller number of interneurons. To maintain the same E/I ratio of 89:11  
901 (Bezaire & Soltesz, 2013), we increased the number of interneurons accordingly. The resulting cell  
902 composition counts and densities are shown in Table S3.

## 903 **4.15 Cell placement**

### 904 **4.15.1 Soma placement**

905 We expanded the basic algorithm of Markram et al. (2015) to take into account the more complex  
906 volume of the atlas and the particular constraints of the hippocampus. For each me-type, the cell  
907 positions are created given cell density volumetric data (using uniform distribution). The total cell  
908 count is calculated based on cell density values and the volume. Each voxel is populated with the  
909 desired count of cells, weighted by the contribution of that voxel to the total density so that the total  
910 count of cells is reached. For SR\_SCA and SLM\_PPA, we could not select morphologies for all the  
911 potential positions within the corresponding layers. For this reason, the soma placement was restricted  
912 to two narrow subvolumes within the layers. In the case of SCA, we placed the soma in the middle of  
913  $SR \pm 5\%$  of the layer thickness. In the case of PPA, we placed the cells in the lower part of the layer,  
914 from 2% to 10% of the layer.

### 915 **4.15.2 Cell orientation**

916 Once we decided the soma positions, we oriented the neuronal morphologies to follow the curvature of  
917 the hippocampus and other additional constraints. For all the cells, we aligned their y-axis with the  
918 radial axis of the hippocampus, and this allowed us to compute the placement scores and select the  
919 morphologies that best fit the space. Cells may show a preferential orientation around the radial axis.  
920 For interneurons, the experimental evidence for a specific orientation in the transverse-longitudinal plane  
921 is scarce, and we applied a random rotation around the radial axis to avoid any bias in the orientation.  
922 On the contrary, literature has reported a particular orientation for pyramidal cell axons. Pyramidal cells  
923 normally have two main branches, roughly parallel to the transverse axis, one towards the subiculum  
924 and one towards the CA3. There is also a thinner branch that is roughly parallel to the longitudinal  
925 axis (Knowles & Schwartzkroin, 1981; S. Yang et al., 2014). To take this into account, we rotated the  
926 pyramidal cells so that their axons were parallel to the transverse axis and the most complex branch  
927 points closer to subiculum.

928

### 929 4.15.3 Morphology selection

930 Once we identified the cell positions, we selected the morphologies that most closely matched a set of  
931 rules to ensure correct neurite targeting. We distinguished two types of rules: strict and optional ones  
932 (see later in this section). Optional rules are shown in Table S6, while we used only one strict rule, i.e.,  
933 dendrites and axons should be below the top of SLM.

934 For each soma position, we have a candidate pool of morphologies to be selected. The candidate pool  
935 is computed as follows. For each soma position, we consider the radial axis passing through it and  
936 compute the relative position of the soma and the layer boundaries. For each morphology we associate  
937 a score  $\hat{S}$  that describes how well the rules are matched. If  $\hat{S} = 1$  we have a perfect match,  $\hat{S} = 0$  the  
938 rules are not matched and the morphology is excluded from the pool. The score combines a score for  
939 'optional' rules  $\hat{I}$  and 'strict' rules  $\hat{L}$

$$\hat{S} = \hat{I} \bullet \hat{L} \quad (3)$$

940  $\hat{I}$  combined all the scores from the  $n$  'optional' rules  $I_j$  as follows:

$$\hat{I} = \left( \frac{\sum_j I_j^{-1}}{n} \right)^{-1} \quad (4)$$

941 The use of a harmonic mean allows us to penalize low scores for a particular rule heavier than a simple  
942 mean, but still "to give it a chance" if other interval scores are high. If some optional score is close  
943 to zero ( $< +0.001$ ), the aggregated optional score would be zero. If there are no optional scores or if  
944 optional scores are ignored  $\hat{I} = 1$ .

945 Each rule  $I_j$  is computed as follows:

$$I = \max \left( \frac{\min(a^\uparrow, r^\uparrow) - \max(a^\downarrow, r^\downarrow)}{\max(a^\uparrow - a^\downarrow, r^\uparrow - r^\downarrow)}, 0 \right) \quad (5)$$

946 Where  $(a^\uparrow, a^\downarrow)$  is the interval of the dendrites, axon or dendritic tuft (when applicable) corresponding to  
947 the rules. It corresponds to the interval as defined above that needs to be shifted by the soma position  
948  $y_0$  of the morphology in the circuit

$$(a^\uparrow, a^\downarrow) = (a_0^\uparrow, a_0^\downarrow) + y_0 \quad (6)$$

949  $(r^\uparrow, r^\downarrow)$  is the interval of the target region along the radial axis passing through  $y_0$ . This interval  
950 corresponds to the rules expressed as relative intervals in the table above, converted to  $\mu\text{m}$ .

951 The numerator represents the overlap of the two intervals, while the denominator normalizes the overlap  
952 by the largest interval among  $(a^\uparrow, a^\downarrow)$  and  $(r^\uparrow, r^\downarrow)$ . In this way, only a perfect overlap receives a score

953 of 1, while if one interval is larger than the other, the score is lower than 1.

954  $\hat{L}$  combines all the scores from the 'strict' rules  $L_k$  as follows:

$$\hat{L} = \min_k L_k \quad (7)$$

955 If there are no strict scores  $L = 1$ .

956 Given the multiple constraints described above, 2.6% soma positions could not have any associated  
957 morphologies, and they were ignored. This resulted in fewer neurons than expected. However, validation  
958 of the cell composition and densities reassured us that this discrepancy is not significant. In fact, lower  
959 densities occurred mainly at the border of the circuit where the particular distorted shape of the layers  
960 makes the cell placement more complicated.

## 961 **4.16 Circuit sections**

962 We defined a series of sections of the circuit to be used in analyses and simulations. In particular,  
963 we defined nine cylinders equally spanned from position 0.1 to 0.9 along the longitudinal axis, in the  
964 middle of the transverse axis (0.5) and with a radius of 300  $\mu\text{m}$ . In addition, we defined 47 consecutive  
965 non-overlapping transverse slices of thickness of 300  $\mu\text{m}$ .

## 966 **4.17 Synapses**

### 967 **4.17.1 Local synapse anatomy**

968 To derive the connectome, we adapted the algorithm described in Reimann et al. (2015). The first part  
969 of the algorithm finds all potential synapses (appositions or touches) among cells based on colocalization  
970 of presynaptic axon and postsynaptic cells. We allowed all the possible connections between m-types  
971 with the exception of AA cells that can form contacts only with PC. We allow synapses to occur on soma  
972 and dendrites, with the following two exceptions: PC-PC connections only occur on dendrites (Megias  
973 et al., 2001) and AA cells make synapses only on AIS of PCs (Freund & Buzsáki, 1996). Initially, SCA,  
974 Ivy, and BS were found to make too many synapses on the PC soma compared to the data reported  
975 in literature (Freund & Buzsáki, 1996; Vida et al., 1998; Klausberger, 2005; Fuentealba et al., 2008).  
976 Since the number of expected synapses on the soma is relatively low, and since the tool does not allow  
977 us to prune synapses on specific compartments, we decided not to allow SCA, Ivy, and BS to make  
978 synapses on PC somas.

979 An apposition occurs when the presynaptic axon is within a threshold distance (maximum touch distance)  
980 from the postsynaptic cell. In the somatosensory cortex microcircuit, this distance was set to 2.5  $\mu\text{m}$   
981 and 0.5  $\mu\text{m}$  for synapses on PCs and INTs respectively (Markram et al., 2015). However, when we  
982 applied the same thresholds to the hippocampus, we could not match some of the experimental data.  
983 In particular, compared to experimental data there were too many connections among PCs and too few  
984 between PCs and INTs (Takács et al., 2012). Using a grid search approach, we found that maximum  
985 touch distances of 1.0  $\mu\text{m}$  and 6.0  $\mu\text{m}$  for synapses on PCs and INTs respectively represent the minimum

986 values that guarantee a sufficient number of synapses to match experimental data (Takács et al., 2012)  
987 and a certain room for the subsequent pruning step.

988 The second part of the algorithm discards synapses (pruning) in order to match experimental data on  
989 bouton densities (mean and standard deviation) and numbers of synapses per connection (mean). As  
990 experimental data were available for only a few pathways, we had to make additional assumptions for  
991 the uncharacterized pathways. According to Reimann et al. (2015), the number of appositions per  
992 connection can be used to predict the number of synapses per connection. We plotted the number of  
993 appositions as found by the model and the number of synapses for characterized pathways, and found  
994 that we can describe a good relationship among the two by splitting the data points into two groups  
995 (I-I connections and the rest) and fitting them separately ( $y = 0.1096x$  for I-I,  $R = 0.401$ ,  $p = 0.325$ ;  
996  $y = 1.1690x$  for the rest,  $R = 0.267$ ,  $p = 0.828$ ) (Figure S11). For mean bouton density, we applied  
997 an average bouton density from characterized pathways to uncharacterized ones. Finally, the standard  
998 deviation of bouton density is estimated from the mean bouton density for the given pathway and the  
999 coefficient of variation (CV) estimated from a well-characterized pathway which we can generalize to  
1000 all the other pathways. For somatosensory cortex, Reimann et al. (2015) used a CV of 0.32. For the  
1001 hippocampus, the best source is Sik et al. (1995) which reported that the 64 PV postsynaptic cells  
1002 receive 99 boutons from PVBC. They also reported that 51 neurons received one synapse, while 13  
1003 neurons received from two to four synapses, for a total of  $99 - 51 = 48$  synapses. So, the 13 neurons  
1004 have on average  $48/13 = 3.69$  synapses per connection. We estimated the standard deviation to be  
1005 1.08 by considering 51 neurons with one synapse, and 13 neurons with 3.69 synapses. The resulting  
1006 coefficient of variation is then  $1.08/1.55 = 0.70$ . We scanned several CVs between these two extremes  
1007 and checked how well the resulting connectomes matched experimental data on several parameters. We  
1008 obtained the best results with a CV of 0.50, and we applied it to all the pathways.

1009 As reported in Reimann et al. (2015) a bouton may form synapses onto two different postsynaptic  
1010 neurons and we need to take this into account to better use data on bouton density to constrain the  
1011 connectome. We replaced the value of 1.2 for synapses per bouton used by Reimann et al. (2015) with  
1012 1.15 taking into account newer unpublished data.

#### 1013 **4.17.2 Local synapse physiology**

1014 The methodology for the design of the synapse models, the extraction of the parameters, and their im-  
1015 plementation is described in detail in Ecker et al. (2020) with the only exception of increasing the sample  
1016 size of the number of pairs (i.e., 10,000 pre-post neurons) to increase the robustness of the calibration  
1017 (see below). In brief, synapses were modeled with a stochastic version of the Tsodyks-Markram model  
1018 (Tsodyks & Markram, 1997; Markram et al., 1998; Fuhrmann et al., 2002), featuring multivesicular  
1019 release (Barros-Zulaica et al., 2019). We used sparse data from the literature (Tables S13 and S14)  
1020 to parameterize the model in a pathway-specific manner. We aimed at characterizing the physiological  
1021 properties of synapses like PSC rise and decay time constants, receptor ratios (NMDA/AMPA), and  
1022 short-term plasticity (STP) profiles, which can be directly input into the model after some corrections  
1023 (e.g., for calcium concentration, temperature, and liquid junction potential). We set the synaptic rever-  
1024 sal potential ( $E_{rev}$ ) to 0 mV for AMPA and NMDA receptors, and to  $-80$  mV for  $GABA_A$  receptors;  
1025  $\tau_{rise} = 0.2$  ms for AMPA and  $GABA_A$  and 2.93 ms for NMDA receptors (Maccaferri et al., 2000; An-

1026 drásfalvy & Magee, 2001; Neu et al., 2007; Elfant et al., 2008; Fuentealba et al., 2008; Földy et al.,  
1027 2010; Lee et al., 2010; Moradi & Ascoli, 2020).

1028 We sampled 10,000 connected pairs from the circuit and replicated paired recordings *in silico* to calibrate  
1029  $N_{RRP}$  (the number of vesicles in the release-ready pool) and peak synaptic conductance to match *in vitro*  
1030 PSC CVs and PSP amplitudes, respectively (Barros-Zulaica et al., 2019; Ecker et al., 2020). Because  
1031 of the sparsity of experimental data, at the end of this exercise, we only had six and 14 pathways (out  
1032 of 130) with calibrated  $N_{RRPs}$  and synaptic peak conductances, respectively. For the uncharacterized  
1033 pathways, we had to generalize the values found.

1034 As in a previous study, the release probability of the synapses scales nonlinearly with the extracellular  
1035 calcium concentration, enriching their dynamical regime even further (Markram et al., 2015). The  
1036 scaling of the release probability is made using a Hill function with three possible coefficients (steep,  
1037 intermediate, shallow). NMDA/AMPA receptor ratios are pathway-dependent. Physiological evidence  
1038 about release probability scaling and NMDA/AMPA ratios exists only for a minimal number of pathways.  
1039 Thus, as the last step, we grouped the characterized pathways into 22 classes based on neurochemical  
1040 markers, STP profiles, and peak synaptic conductances and used class average values predicatively for  
1041 the remaining uncharacterized pathways.

## 1042 **4.18 Schaffer collaterals (SC)**

### 1043 **4.18.1 SC synapse anatomy**

1044 In the case of Schaffer collaterals, we did not model presynaptic CA3 pyramidal cells, and their axons,  
1045 but directly the synapses on the postsynaptic neurons. For this reason, we followed an approach different  
1046 from the one used for CA1 internal synapses, and we used the tool Projectionizer (Table 1), already  
1047 adopted to model thalamo-cortical and cortical-thalamic projections (Markram et al., 2015; Reimann  
1048 et al., 2022; Iavarone et al., 2023). In brief, the generation of projections was a multi-step workflow as  
1049 described below.

1050 The number of CA3 PCs was constrained considering the physiological ratios between CA3 PCs and  
1051 CA1 PCs, as reported by Bezaire and Soltesz (2013), an approach consistent with the rest of the cell  
1052 composition. Having estimated the number of presynaptic neurons (i.e., 267,238), we determined the  
1053 number of afferent synapses on CA1 PCs to be 20,878 (the average of the range reported in Table 22  
1054 of Bezaire and Soltesz (2013), and the number of afferent synapses on interneurons to be 12,714 (the  
1055 average of the range reported in Table 26 of Bezaire and Soltesz (2013). Details on the experimental  
1056 data used to constrain SC anatomy are reported in Table S15.

1057 To connect CA3 PC axons (i.e., SCs) with CA1 neurons, for each region in CA1, we gathered all the  
1058 dendrite segment samples in the voxelized atlas. Neuron somas were not considered viable targets.  
1059 Each region-wise candidate segment pool was then subsampled. Each region was assigned a number  
1060 of synapses based on the synapse distribution (i.e., SLM: 0.3%, SR: 67.9%, SP: 7.1%, SO: 24.7%)  
1061 and the total afferent synapses. The drawing from the pool was done with replacement, and sampling  
1062 was weighted by the segment length not to oversample short segments. The sampled segments were  
1063 considered as candidates for placing synapses. For each sampled segment, a random synapse position

1064 was chosen along the segment. Then, the candidate synapses were randomly assigned to each of the  
1065 CA3 PCs presynaptic neurons. Finally, synaptic physiology parameters were drawn from distributions  
1066 with specific means and standard deviations (see SC physiology Section). To match the average number  
1067 of SC on PC and INT, the workflow was run separately for SC to PC and SC to INT.

#### 1068 4.18.2 SC physiology

1069 To define the synaptic parameters, we distinguish two pathways: SC-PC and SC-INT. In both cases,  
1070 we used the Tsodyks-Markram model parameters estimated by Wierenga and Wadman (2003) (Tables  
1071 S17 and S18), since we did not have experimental traces to estimate the parameters (as done with the  
1072 internal synapses). We also set the NMDA/AMPA ratio, rise and decay time constant for NMDAR  
1073 according to available data (Tables S17 and S18). The remaining parameters were not available, and  
1074 we optimized them using two-steps procedure that is schematically reported in Figure S17B. In the first  
1075 step, we set placeholder values for rise and decay time constant for AMPAR, and optimized maximum  
1076 synaptic conductance and  $N_{RRP}$ , while in the second step, we optimized the AMPAR time constants. In  
1077 each step, we aimed to match a set of experimental measures that depend on the considered pathway.  
1078 We used a grid search and selected the model parameters that minimized a cost function defined as:

$$error = \sum \frac{|x_i^{mod} - x_i^{exp}|}{x_i^{exp}} \quad (8)$$

1079 Where  $x^{exp}$  is the experimental value we want to match, and  $x^{mod}$  is the value produced by the model.  
1080 Because of the strong parameter interdependence, after each step, the other step was rerun in order to  
1081 verify if both held true. The cycle ended when the two steps converged toward a satisfactory solution  
1082 (i.e. model and experiments are not statistically different). As done for the definition of the internal  
1083 CA1 synaptic parameters, we ran all the steps selecting 10,000 random pairs of pre- and postsynaptic  
1084 neurons.

1085 **Definition of SC-PC synaptic parameters** To constrain the peak synaptic conductance,  $N_{RRP}$ , rise  
1086 and decay time of AMPA and NMDA receptors, we aimed to match mean, CV, rise and decay time  
1087 constant, and half-width of the PSP as reported in Sayer et al. (1990) (Table S17). We set up the  
1088 simulations to best approximate the same experimental conditions (2.0 mM  $Mg^{2+}$  and 2.0 mM  $Ca^{2+}$ ).

1089 **Definition of SC-INT synaptic parameters** To constrain the peak synaptic conductance and  $N_{RRP}$ ,  
1090 we used Glickfeld and Scanziani (2006) as a reference. The authors distinguished between cannabinoid  
1091 receptor type 1 negative (CB1R-) basket cell (BC) and CB1R+ BC. Each cell type has a very distinctive  
1092 response to SC stimulation, measured as the ratio between EPSC from SC to BC and the EPSC from  
1093 SC to PC ( $EPSC_{BC}/EPSC_{PC}$ ) (Table S18). We considered the CB1R- and CB1R+ BC to be  
1094 representative respectively of all the CB1R- and CB1R+ INTs. We considered CB1R+ INTs to include  
1095 PPA, CCKBC, and SCA, while CB1R- INTs the rest, according to the molecular marker profiles reported  
1096 on [www.hippocampome.org](http://www.hippocampome.org) (Wheeler et al., 2015; Sanchez-Aguilera et al., 2021).

1097 Following this strategy, we treated the two populations, CB1R- and CB1R+ INTs, separately, and we



1098 optimized the peak synaptic conductance and  $N_{RRP}$  to match the corresponding EPSC ratio. We set up  
1099 the simulations to best reproduce the experimental conditions (i.e., 1.3 mM  $Mg^{2+}$ , 2.5 mM  $Ca^{2+}$ , and  
1100 NMDAR blocked). For each combination of parameters, we simulated 1,000 voltage-clamp experiments  
1101 (neurons clamped at  $-85$  mV as in the experiments) where we stimulated with a single spike one SC  
1102 connected to one PC and one interneuron. For each of the 1,000 triplets SC-PC-interneuron, we have  
1103 simulated 100 trials to have a sufficient number of traces to compute robust statistics of EPSCs. PSC  
1104 ratios were computed only when there was a PSC in both PC and INT of the triplet. For each triplet,  
1105 the mean PSC values were computed.

1106 To optimize rise and decay time constants of AMPAR, we aimed to match the EPSP-IPSP latency as  
1107 reported by Pouille and Scanziani (2001) (Table S18). We set up the simulations to reproduce the  
1108 same experimental conditions (1.3 mM  $Mg^{2+}$ , 2.5 mM  $Ca^{2+}$ , and NMDAR blocked, with and without  
1109 inhibition). For the sake of simplicity, we optimized the parameters of PVBC given their important role  
1110 in feedforward inhibition (Pouille & Scanziani, 2001; Glickfeld & Scanziani, 2006) and then generalized  
1111 the resulting parameters to the other INTs. To identify a feedforward loop SC-PV-PVBC, we proceeded  
1112 as follows: 1) randomly select one PVBC; 2) select one PC connected to the PVBC; 3) select 200 SC  
1113 fibers that innervate the PVBC. A simultaneous stimulation of 200 SC fibers is necessary to trigger an  
1114 AP in PVBC; and 4) check whether at least one of these SC fibers also innervates the PC. If this is  
1115 not the case, we repeat the procedure. We selected 1,000 SC-PC-PVBC triplets. For each triplet, we  
1116 simulated 35 trials (different seeds). Each trial was 900 ms long, with spikes simultaneously delivered to  
1117 the 200 SC fibers at 800 ms. We then made an average of the included voltage traces for each triplet  
1118 and computed the EPSP with and without the inhibition. We derived the IPSP trace by subtracting  
1119 the trace with inhibition from the trace without inhibition (Figure S17E1). Traces with EPSP or IPSP  
1120 failures, without PC or INT spikes, or more than one spike were excluded from the analysis. Since some  
1121 parameter combinations led to few valuable traces and this could bias the result, we included the number  
1122 of surviving traces in our cost function (Equation 8), where  $x^{mod}$  becomes the number of usable traces  
1123 and  $x^{exp}$  the total number of traces (i.e. 35,000).

### 1124 4.18.3 SC validation

1125 The reconstruction of the SC were validated against the results of Sasaki et al. (2006) on input-output (I-  
1126 O) characteristics of SC projections *in vitro*. We set up the simulations to mimic the same experimental  
1127 conditions (slice of 300  $\mu$ m,  $Ca^{2+}$  2.4 mM,  $Mg^{2+}$  2.4 mM, 32 °C) (Figure 4A). As in the experiment,  
1128 we randomly selected 101 SP neurons in the slice. We randomly chose 350 SC inputs to activate  
1129 simultaneously, evoking an AP at  $t = 1000$  ms. This input was able to make all the 101 neurons spike  
1130 corresponding to 100% of input/output (Figure 4B). We activated a different percentage of the 350  
1131 SC fibers, ranging from 5% to 100%, and quantified the number of spiking neurons. We repeated the  
1132 protocol by blocking the GABAergic synapses, and repeated each condition (with and without GABAR)  
1133 in five different slices. We computed the Pearson correlation coefficient R in control conditions to assess  
1134 the linearity of IO curve in control condition (with GABAR).

## 1135 4.19 Cholinergic modulation

1136 To build a model of the effects of cholinergic release we began by collecting and curating literature  
1137 findings from bath application experiments in which ACh, carbachol (CCh), or muscarine were used.  
1138 We extracted data on their effects on neuron excitability (membrane potential, firing rate, Table S19),  
1139 synaptic transmission (PSP, PSC, Table S20) and network activity (extracellular recordings, Table S21).  
1140 We subsequently verified that the other experimental conditions (such as cell type, connection type and  
1141 mouse vs rat provenance) did not produce further data stratification.

1142 Since for each experiment, data was available for both control and drug-applied conditions, we estimated  
1143 the relative amount of depolarizing current at different concentrations of ACh. For sub-threshold data,  
1144 we computed the cell-type specific amount of current causing a change in the resting membrane potential  
1145 equal to the mean value reported in the experiments. For supra-threshold data, we computed the  
1146 amount of current needed to increase the firing rate from the baseline frequency to the frequency in  
1147 ACh conditions.

1148 The data points show a dose-dependent increase in depolarizing current. To describe this effect, we  
1149 fitted a Hill function assuming the ACh-induced current at control condition is zero ( $R^2 = 0.691$ ,  
1150  $N = 28$ ).

$$I_{depol} = \frac{0.567ACh^{0.436}}{100^{0.436} + ACh^{0.436}} \quad (9)$$

1151 where  $I_{depol}$  is the depolarizing current (in nA) and ACh is the neuromodulator concentration in  $\mu\text{M}$   
1152 (Figure 5A,C).

1153 At the synaptic level, the data points show a dose-dependent decrease in the amplitude of the volt-  
1154 age/current response to pre-synaptic stimulation for all pathways analyzed (Table S20). Since ACh  
1155 affects synaptic transmission principally at the level of release probability (Tsodyks & Markram, 1997;  
1156 M. E. Hasselmo, 2006; D. Yang et al., 2021), we used the Tsodyks-Markram model (Tsodyks & Markram,  
1157 1997; Markram et al., 1998; Fuhrmann et al., 2002) and introduced scaling factor to make the parameter  
1158  $U_{SE}$  (neurotransmitter release probability) dependent on ACh concentration with a Hill function fitted  
1159 to experimental data ( $R^2 = 0.667$ ,  $N = 27$ ).

$$U_{SE}^{ACh} = \frac{1.0ACh^{-0.576}}{4.541^{-0.576} + ACh^{-0.576}} U_{SE} \quad (10)$$

1160 where  $U_{SE}$  is the release probability (without ACh), and  $U_{SE}^{ACh}$  is the release probability with the  
1161 dependency on ACh concentration (Figure 5B,D).

1162 As a control, we verified that the values of PSP or PSC are proportional to  $U_{SE}$ .

1163 For each network simulation, we applied these equations to compute the effect of ACh concentration  
1164 on cells and synapses. In particular, we inject the same amount of depolarizing current (equation 9) to  
1165 all the cells and apply the same  $U_{SE}$  scaling factor (Equation 10) to all pathways including Schaffer

1166 collaterals. All the simulations shown in figure 5E-K were run on the cylinder microcircuit with the  
1167 extracellular calcium concentration set to 2 mM and a duration of 10 s. To disregard the initial ramping  
1168 activity, we used the last 9 s of the simulation to compute correlation metrics.

## 1169 **4.20 Simulation**

### 1170 **4.20.1 Model instantiation and execution**

1171 For running the hippocampus simulations, the NEURON simulator is used and leverages the CoreNEU-  
1172 RON optimized solver for improved efficiency (Awile et al., 2022). The model is instantiated using  
1173 existing scripting methods for NEURON to construct the components of the virtual tissue and add  
1174 support constructs such as stimuli and reports. Users can use the introspection feature of NEURON to  
1175 adapt parameters based on certain features and identifiers. Once all components have their final values,  
1176 the data structures are serialized to disk so that they can be loaded by the CoreNEURON solver into  
1177 optimized data structures. This results in a 4-7 $\times$  reduction in memory utilization by CoreNEURON, al-  
1178 lowing larger simulation on the same hardware. The memory layout can better utilize hardware features  
1179 such as vectorized instructions and can have a 2-7 $\times$  improvement to execution time.

### 1180 **4.21 Simulation experiments**

1181 For simulations in Section 2.2, spike time, intracellular membrane potential, and extracellular voltage  
1182 were recorded and analyzed.

#### 1183 **4.21.1 CA1 spontaneous synaptic release**

1184 The aim of these simulations was to discover whether spontaneous synaptic release in the intrinsic circuit  
1185 would be sufficient to induce rhythmic activity in CA1. So for these simulations, the stochastic synaptic  
1186 release was enabled for each model intrinsic synapse and the SC input disconnected for the entire period  
1187 simulated, typically 10 s. *In vitro* CA1 spontaneous synaptic release rate mPSPs are generally estimated  
1188 from recording postsynaptic events (Table S22), which is the summation of presynaptic release from the  
1189 many converging axons. To determine what presynaptic rate parameter value to assign to the synapse  
1190 models, we ran single neuron simulations for a range of mean presynaptic release rates. We verified that  
1191 the presynaptic rate range produced a postsynaptic rate range that included ranges reported in literature  
1192 (Figure S18A). We ran circuit simulations using this presynaptic rate range with both *in vitro*- and *in*  
1193 *vivo*-like calcium concentrations. All other parameters remained constant across simulations.

#### 1194 **4.21.2 CA1 random synaptic barrage**

1195 The aim of these simulations was to discover whether random synaptic activity of the intrinsic circuit  
1196 would induce oscillatory activity in CA1. Therefore, in these simulations, SC input was connected  
1197 while stochastic synaptic release for intrinsic and extrinsic synapses was disabled for the entire period  
1198 simulated, typically 10 s. SC spike times were generated independently for each input implemented using  
1199 a Poisson random process with a constant (homogeneous) mean firing rate (Hz). To match the input  
1200 firing rate of SC input that was able to generate regular theta activity in their CA1 model, we downloaded  
1201 and analyzed example afferent input data provided with their Figure 5 of Bezaire et al. (2016). While  
1202 Bezaire et al. (2016) quoted 0.65 Hz as the critical input rate of synaptic barrage required to generate

1203 theta activity, we found their actual spike data had a much lower rate  $\sim 0.14$  Hz ( $\sim 64$ k spikes, the  
1204 summation of their "proximal" and "distal" afferent sources arrived per second from  $\sim 450$ k afferents).  
1205 To cover this range, we ran simulations with constant random spiking rates of 0.05-0.60 Hz and repeated  
1206 these simulations at *in vitro*- and *in vivo*-like calcium levels. All other parameters remained constant  
1207 across simulations.

#### 1208 **4.21.3 CA1 bath concentration of extracellular calcium and potassium ions**

1209 The aim of these simulations was to discover whether tonic depolarization of the intrinsic circuit led to  
1210 the emergence of oscillatory activity in CA1. Hence, stochastic synaptic release was disabled for each  
1211 model intrinsic synapse and SC input disconnected for the entire period simulated, typically 10s. We  
1212 modeled the bath effect of calcium as explained previously and the effect of extracellular potassium  
1213 ion ( $K^+$ ) concentration as an constant current injected into the somatic compartment of each neuron  
1214 (115-140% relative to each neuron's rheobase current) (Markram et al., 2015). Simulations for this  
1215 range of injected currents were repeated for a range of calcium concentrations between *in vitro*- and *in*  
1216 *vivo*-like levels. All other parameters remained constant across simulations.

#### 1217 **4.21.4 CA3 theta oscillatory input**

1218 The aim of these simulations was to discover whether regular theta activity delivered via SC input to the  
1219 intrinsic circuit would induce theta activity in CA1. So for these simulations, SC input was connected  
1220 while stochastic synaptic release for intrinsic and extrinsic synapses was disabled for the entire period  
1221 simulated, typically 10s. SC spike times were generated independently for a subset of input axons  
1222 (typically 15,000) using a Poisson random process with a sinusoidal (inhomogeneous) firing rate (Hz)  
1223 using the Elephant software package functions (Denker et al., 2018). Here, the individual mean rate  
1224 of firing (cell frequency, 0.1-0.4 Hz) defines the offset and amplitude that was sinusoidally modulated  
1225 over time to represent theta-band (4-10 Hz) oscillation (signal frequency). Simulations spanning the  
1226 range of combinations of cell frequency and signal frequency were repeated at *in vitro*- and *in vivo*-like  
1227 calcium levels. All other parameters remained constant across simulations.

#### 1228 **4.21.5 Medial septum input**

1229 In this set of simulations, we aimed to study how MS input can induce theta oscillations in CA1. All the  
1230 simulations run on the cylinder microcircuit with the extracellular calcium concentration set to 1 mM (*in*  
1231 *vivo*-like level). All the neurons received a background depolarization, expressed as a percentage of the  
1232 voltage threshold. Since the background depolarization is not completely known during theta oscillation,  
1233 we tested values from 100% (threshold) to 130%. Above 130%, we observed non-physiological behaviors  
1234 of the cells. The sinusoidal hyperpolarizing current injected in PV+ interneurons can be described by  
1235 three parameters: frequency, mean, and amplitude. To reduce the parameter space to be scanned, we  
1236 considered only the frequency of 8 Hz, an intermediate value in the theta range (4-12 Hz). In addition,  
1237 we set *mean* = *-amplitude*. The disinhibition amplitude is unknown and we tested values in a range  
1238 that produces physiological hyperpolarization in the PV+ interneuron models (0.1-0.5 nA). We scanned  
1239 also different acetylcholine concentrations which are biological plausible (0-2  $\mu$ M). The simulations ran  
1240 for 20s and disinhibition started at time 10s.

#### 1241 **4.21.6 Propagation of oscillatory inputs**

1242 To examine whether CA3 gamma oscillations propagated to CA1, we aimed to reproduce the *in vitro*  
1243 slice experimental results in Zemankovics et al. (2013). During these CCh-induced gamma oscillations  
1244 the time course of CA3 spiking activity did not follow a pure sinusoidal waveform, so we had to create  
1245 a custom inhomogeneous rate function. We did this by first manually reconstructing the probability  
1246 of discharge of CA3 pyramidal cells over time (shown in Figure 4D, orange trace) and then mapped  
1247 a smoothed version of these values from phase (radians) to time (seconds) coordinates to create a  
1248 temporal rate function modulated at the reported gamma frequency of 31 Hz. The spike trains were  
1249 generated from this custom rate function using the Elephant software package (Denker et al., 2018).  
1250 Since the circuit did not model the topography of SC connections to CA1 neurons, it did not constrain  
1251 how many active SCs project to the simulated slice. Therefore, we ran multiple simulations varying  
1252 the number of activated SC axons with overall mean rate matching the reported average firing rate of  
1253 CA3 PCs (Zemankovics et al., 2013). To mimic the same experimental conditions, we simulated a slice  
1254 circuit with extracellular  $Ca^{2+}$  2 mM and  $Mg^{2+}$  2 mM. The effect of bath application of 10  $\mu$ M CCh  
1255 effect on CA1 neurons was modeled using the approach described earlier (see Cholinergic modulation  
1256 Section). These simulations ran for 5 s, during which stochastic synaptic release for intrinsic and extrinsic  
1257 synapses was disabled, with SC input applied 2 s to 5 s. All other parameters remained constant across  
1258 simulations.

1259 In a final set of simulations, we studied how the CA1 circuit responds to CA3 oscillatory input covering a  
1260 broad range of frequencies (0.5 - 200 Hz). We simulated an oscillatory input at CA3, with four different  
1261 signal strengths (0.1, 0.2, 0.4, and 0.8 Hz, as mean firing rate) and spike trains were generated using  
1262 Elephant (Denker et al., 2018). We measured the spiking response of CA1, checking if it was constant  
1263 regardless of the oscillation frequency of CA3. Then, we computed the correlation between CA3 and  
1264 CA1 and within CA1 neurons using the metrics explained below in Section 4.22.2, with 10,000 randomly  
1265 selected cell pairs (CA3-CA1 or CA1-CA1, respectively). All spike train correlation measurements were  
1266 repeated using standard covariance and cross-correlation functions. All the simulations run on the  
1267 cylinder microcircuit with the extracellular calcium concentration set to 2 mM and a duration of 6  
1268 seconds. We used 1 s of activity (i.e., from 3 s to 4 s of simulation time) to compute gains and correlation  
1269 metrics.

#### 1270 **4.22 Analysis**

1271 Simulations showed an initial transient due to variable initiation and it appeared as an initial high activity  
1272 of the network. This transient lasted for few ms, but we normally discarded the first 1000 ms in all the  
1273 simulation analyses to be sure that the parameters converged into a stable regime.

##### 1274 **4.22.1 LFP analysis**

1275 For all simulations where extracellular voltage was recorded, the LFP analysis was performed in the same  
1276 way unless otherwise stated. The raw extracellular voltage signal was estimated from multiple locations  
1277 (channels) in the circuit model to mimic experimental electrode positions of a linear probe (Figure  
1278 2C). Following a standard electrophysiological processing protocol (e.g. Bokil et al., 2010), the raw  
1279 extracellular signal was divided into two components using 6th-order Butterworth filtering implemented

1280 in the Elephant package (doi:10.5281/zenodo.1186602; RRID:SCR\_003833) (Denker et al., 2018): a  
1281 low-pass filtered signal (< 400 Hz cutoff) referred to as the local field potential (LFP) and a high-pass  
1282 filtered signal (> 400 Hz). Here we analyzed the low-pass filtered LFP signal only. In the case of  
1283 simulations reproducing the results of Zemankovics et al. (2013), LFP was band-pass filtered between  
1284 10-45 Hz to match their analysis protocol focusing on CA1 low gamma-band oscillations. Typically the  
1285 first second of recording was discarded to eliminate onset transient artifacts. The remaining signal was  
1286 detrended and tested for stationarity before being analyzed further (see Statistical analysis Section). For  
1287 time-frequency analysis, this detrended signal was then downsampled from 2000 (1000/0.5 ms) to 400  
1288 Hz. The downsampled LFP signal was next filtered into separate frequency bands: delta (1-3 Hz), theta  
1289 (4-12 Hz), and gamma (30-120 Hz). A multitaper method was used to estimate power spectral density  
1290 (PSD) of the downsampled LFP signal with a frequency resolution of 1.5 Hz (Prieto et al., 2009, mtspec  
1291 package: <https://pypi.org/project/mtspec/>). To estimate the spatiotemporal LFP spectral response, a  
1292 complex Morlet wavelet transform (CWT) was applied with  $n\_cycles = 7$  for 1-150 Hz range in steps of  
1293 0.25 Hz using the Elephant package function and reported in decibel (dB) units (Addison et al., 2009).  
1294 To identify cross-laminar source-sink relationships, current source density (CSD) analysis was applied  
1295 to the theta-band filtered signal across all channels of the virtual electrode using the Elephant package  
1296 function for KCSD1D method (Potworowski et al., 2012).

1297 For simulations that generated regular theta oscillations, spike-LFP phase coupling and theta waveform  
1298 analyses were performed. To quantify phase preference of neurons during stable periods of theta os-  
1299 cillations (defined as at least three 2 second periods of theta in Klausberger et al., 2003), the Hilbert  
1300 analytic transform of single channel theta-band signal (unless otherwise stated in SP) was calculated to  
1301 estimate the instantaneous phase using the Elephant package function. The instantaneous phase was  
1302 used to assign a (theta) phase angle to individual spike times for a period over two consecutive theta  
1303 cycles (0-720 degree period) with trough of theta cycle set as 0 degrees (Klausberger et al., 2003).  
1304 For each neuron, the resultant (summed) vector angle for its spike train was used to determine the  
1305 preferred phase of firing and the vector norm estimated the degree of phase locking (see Statistical  
1306 analysis Section). To quantify waveform asymmetry, we measured the asymmetry index for a low-pass  
1307 LFP signal filtered in 1-80 Hz range (Belluscio et al., 2012). To identify peak and trough locations, we  
1308 used z-score thresholding, as the Hilbert method yielded too many spurious locations, and from this we  
1309 computed the duration of rise ( $t_{rise}$ ) and decay ( $t_{decay}$ ) for each oscillation. The asymmetry index per  
1310 oscillation was calculated from  $\log(t_{rise}/t_{decay})$ .

#### 1311 4.22.2 Correlation

1312 To have a quantitative measurement of correlations between spike trains, we mainly used the spike time  
1313 tiling coefficient (STTC) and the mean spike-spike correlations, computed for a defined number of cell  
1314 pairs (normally 10,000, for robustness) as the histogram of intervals between all spike times of two  
1315 different cells. For both STTC and spike-spike correlations we used a bin size of 10 ms, considering 1 s  
1316 of simulated activity.

1317 To verify the results obtained with the STTC method, we computed with the same input data the  
1318 correlation using standard covariance and cross-correlation functions. All correlation analyses have been  
1319 done with the Elephant library (Denker et al., 2018).



## 1320 **4.23 Statistical analysis**

1321 To calculate the slopes in linear fits to the appositions data, we used least-squares solution from the  
1322 python toolbox (`numpy.linalg.lstsq` function).

1323 For the fitting of experimental data points of cholinergic modulation we used the non-linear least squares  
1324 solution (`scipy.optimize.curve_fit` function). Values are expressed as  $R^2$  coefficients.

1325 For LFP analysis, the Augmented Dickey-Full (ADF) unit root test was used to determine whether a sin-  
1326 gle channel continuous signal was stationary before analyzing its spectral properties (`statsmodels.tsa.`  
1327 `stattools.adfuller` function). To determine whether single neurons were phase-locked, the Rayleigh  
1328 Test of randomness of circular data was used to reject the null hypothesis that phase angles of a spike  
1329 train were uniformly distributed (Wilkie, 1983). To compare with empirical results (e.g., Klausberger  
1330 et al., 2003), phase analysis results were described by mean  $\pm$  angular deviation in degrees.

## 1331 **4.24 Statistical comparison methodology**

1332 Our statistical comparisons between the model and experimental data were guided by the experimental  
1333 data availability. To streamline the process, we performed statistical comparisons at an aggregate level  
1334 rather than conducting comparisons for each individual cell type or pathway.

1335 There are two main reasons to perform statistical comparisons at an aggregate level. Firstly, there may be  
1336 a lack of data available at a granular level, such as for cell composition validation. Secondly, for certain  
1337 parameters, such as bouton density, because we used a multi-objective optimization approach to match  
1338 experimental data at an aggregate level, it is more appropriate to validate at an aggregate level as well.  
1339 For these comparisons, we typically use Pearson's Correlation Coefficient (`scipy.stats.pearsonr`).  
1340 Values are expressed as (Pearson correlation coefficient,  $p$ -value).

1341 In cases where we needed to compare a large number of features for a metric, such as in morphology  
1342 cloning validation, we used similarity scores in addition to correlation analysis. However, in other cases,  
1343 when only a mean and standard deviation value were available for comparison, as in Schaffer collateral  
1344 comparison, we used a z-test or t-test. Values are expressed as ( $p$ -value).

1345 Finally, if the experimental data had a very small sample size, such as in the case of population synchrony,  
1346 we did not perform any statistical and we relied only on qualitative assessments.

## 1347 **4.25 Visualization**

### 1348 **4.25.1 Brayns**

1349 Hippocampus circuit and simulations were visualized using Brayns software and its internally developed  
1350 web interfaces: WebBrayns and Brayns Circuit Studio (Table 1).

1351 Brayns is a visualization software based on ray tracing techniques. It allows rendering 3D scenes and  
1352 producing high quality images and videos. Brayns offers programming interfaces in C++ and Python  
1353 that make it highly customizable, while its web-based interfaces allow the interactive exploration of  
1354 the scene and make the platform accessible to a wider community (no programming skills needed). In

1355 order to create high-quality, high-resolution visuals, Brayns makes use of different rendering engines, like  
1356 Intel OSPRay (CPU-based ray tracing library, <https://www.ospray.org/>) or NVIDIA Optix (GPU-based  
1357 ray-tracing framework <https://developer.nvidia.com/rtx/ray-tracing/optix>).

1358 The capability of Brayns to render large-scale models, like the whole hippocampus circuit, is key to  
1359 supporting scientific visualization needs and providing insight on scientific aspects that otherwise are  
1360 very complex to analyze (e.g. signal propagation at circuit level).

1361

1362 The morphology collage images were also produced with Brayns. A set of clipping planes were used  
1363 to determine the locations of the slices. For each plane, a second, parallel plane was placed 100  $\mu\text{m}$   
1364 further from the origin to create a slice of 100  $\mu\text{m}$  thickness. Then, for each slice and for each neuron  
1365 morphological type, a small set of neurons of the chosen morphological type and physically located inside  
1366 the volume determined by the slice were picked and rendered with Brayns together with the polygonal  
1367 meshes that define the outline of CA1 layers. The set of neurons displayed in every slice was chosen in  
1368 a way to maximize its physical distribution within the slice (Figure S9A).

1369 Some of the morphology collage images were post-processed with media design tools (e.g., Adobe  
1370 Illustrator, Adobe Photoshop) to match the visual style of other figures.

#### 1371 **4.25.2 NeuroMorphoVis**

1372 NeuroMorphoVis (NMV, see Table 1) was used to visualize single morphologies (Abdellah et al., 2018).  
1373 NMV is a Blender plug-in that allows the visualization and analysis of neuronal morphology skeletons  
1374 that are digitally reconstructed. NMV presents many features, including the manual repair of bro-  
1375 ken morphology skeletons and the creation of accurate meshes that represent the membranes of the  
1376 morphologies.

### 1377 **4.26 List of assumptions**

#### 1378 **4.26.1 General**

- 1379     ▪ This list is not exhaustive. We describe the assumptions that are specific to this work and the  
1380       ones that could be revised in subsequent refinements
- 1381     ▪ We do not list here the assumptions that are already included in and derive from the adoption of  
1382       specific other models (e.g., Markram et al. (2015); animal models)
- 1383     ▪ Certain assumptions involve the exclusion of specific features. For example, gap junctions, rare  
1384       cell types, glial cells, vasculature, are excluded from the current datasets and model.
- 1385     ▪ In addition to the preceding point, certain limitations were imposed by both data quality and  
1386       accessibility.

#### 1387 **4.26.2 Data**

- 1388     ▪ Most of the data came from the dorsal CA1. We approximated the entire CA1 using data from  
1389       dorsal CA1.
- 1390     ▪ We mixed data from different labs, experimental conditions, and animal models. We assumed  
1391       that the inter-datasets variability is less than the intra-individual variability.

#### 1392 **4.26.3 Volume**

- 1393     ▪ We approximated the layer anatomy by dividing the overall CA1 volume into parallel layers with  
1394       a fixed ratio between their thicknesses. The ratio was taken from the analyses of slice reconstruc-  
1395       tions from dorsal CA1 of adult rats. We presumed that any potential error introduced by this  
1396       approximation was comparatively smaller than the inherent noise present in the original atlas.

#### 1397 **4.26.4 Morphologies**

- 1398     ▪ We considered the reconstructed cell morphologies to be fairly complete.
- 1399     ▪ One PC reconstruction showed an axon with a length of 3.646  $\mu\text{m}$  and an extension of 1.325  $\mu\text{m}$   
1400       along the transverse axis. We deemed this axon to be relatively complete within the CA1 and  
1401       therefore used it as a prototype for all the PCs. We presumed that using other axons would  
1402       introduce a larger problem into connectivity with relatively little gain in diversity.
- 1403     ▪ We treated PCs as one homogeneous cell type.
- 1404     ▪ SP\_PVBC and SP\_CCKBC were classified as two separate classes.
- 1405     ▪ We defined PV+ cells as SP\_PVBC, SP\_BS, SP\_AA, CCK+ cells as SP\_CCKBC, SR\_SCA,  
1406       SLM\_PPA and SOM+ (somatostatin) cells as SO\_OLM, SO\_BS, SO\_BP, SO\_Tri.
- 1407     ▪ Scaling and cloning compensated for the small sample size (Markram et al., 2015).

#### 1408 **4.26.5 Electrical types**

- 1409     ▪ We assumed only four e-types: classical accommodating (cAC), bursting accommodating (bAC)  
1410       and classical non-accommodating (cNAC) for interneurons, and classical accommodating for pyra-  
1411       midal cells (cACpyr).

#### 1412 **4.26.6 Cell composition**

- 1413     ▪ For a given cell type, we assumed that all the expected cells in CA1 are located in the layers for  
1414       which we had the corresponding morphological reconstructions.
- 1415     ▪ Trilaminar cells and radiatum-retrohippocampal cells in SO had the same proportion.

- 1416     ▪ To compensate for the lack of some inhibitory types, we increased the interneurons to match the  
1417     expected E/I ratio of 11:89 (Bezair & Soltesz, 2013). In doing so, we assumed that matching  
1418     E/I ratio was more important than maintaining the expected number of cell types present in the  
1419     model.

#### 1420 **4.26.7 Cell positioning**

- 1421     ▪ The cell somas could have been located in any point of the layers (random placement).  
1422     ▪ Cells had a principal axis that was parallel to the radial axis and perpendicular to the layers.  
1423     ▪ Lacking precise evidence, we allowed random rotations around the y-axis for the interneurons.

#### 1424 **4.26.8 Connectome**

- 1425     ▪ Axo-axonic cells contacted only pyramidal cells.  
1426     ▪ We did not allow SCA, Ivy, and BS to form synapses on PC somas to prevent the number of  
1427     somatic synapses from far exceeding expected values. In doing so, we assumed that the exclusion  
1428     of few synapses would result in a smaller error compared to the one generated by a large number  
1429     of somatic synapses.

#### 1430 **4.26.9 Single cell models**

- 1431     ▪ The considered electrical features were the ones that described most of the behavior of the cells  
1432     (R. Migliore et al., 2018).  
1433     ▪ We considered channels to be uniformly distributed in all dendritic compartments except KA and  
1434     Ih.  
1435     ▪ We applied the same currents of pyramidal cells to interneurons with exceptions supported by  
1436     experimental evidence.

#### 1437 **4.26.10 Synapse model**

- 1438     ▪ Synapses between A and B had the same parameters.  
1439     ▪ Synapses between m-types A and B had parameters extracted from the same distributions (trun-  
1440     cated Gaussian).  
1441     ▪ Generalization: the synapse type and dynamics were defined, first of all, by pre- and post-synaptic  
1442     m-type.  
1443     ▪ The NMDA/AMPA ratio was kept constant through all compartments of a given neuron.

#### 1444 **4.26.11 Network**

- 1445     ▪ The action potential was propagated stereotypically from AIS to synapse with a fixed velocity of
- 1446       300 mm/s (Markram et al., 2015).
  
- 1447     ▪ In slices, neurons preserved their integrity. We did not model cut neurons.

#### 1448 **4.26.12 Schaffer collaterals (SC)**

- 1449     ▪ SC synapses were uniformly distributed along the transverse and longitudinal axes.
  
- 1450     ▪ SC synapses could have been placed at all locations on the target neuron (except on the soma),
- 1451       including apical tuft dendrites.
  
- 1452     ▪ While Glickfeld and Scanziani (2006) measured EPSC only on basket cells, then divided into
- 1453       cannabinoid receptor type 1 negative (CB1R-) and positive (CB1R+), we applied the exper-
- 1454       imental measurements to all interneurons, dividing them into two categories according to their
- 1455       positivity/negativity to CB1 markers, as reported in <https://hippocampome.org/php/markers.php>.
  
- 1456     ▪ STP parameters (i.e.,  $U$ ,  $D$ ,  $F$ , in the Tsodyks-Markram Model (Tsodyks & Markram, 1997))
- 1457       were uniform for all interneurons, and they followed the values identified by Wierenga and Wadman
- 1458       (2003).

#### 1459 **4.26.13 Acetylcholine (ACh)**

- 1460     ▪ The dose-response curves for cholinergic modulation was homogeneous for all cell and synapse
- 1461       types.
  
- 1462     ▪ The dose-response was well described using the Hill equation.
  
- 1463     ▪ ACh, CCh, and muscarine had the same effects on neuronal excitability and synaptic transmission.
  
- 1464     ▪ The change in membrane excitability caused by ACh was assumed to be equivalent to a tonic
- 1465       current injection at the soma.
  
- 1466     ▪ Perisynaptic effects of volumetric transmission (i.e., non-synaptic release) of ACh was neglected.

## 1467 **5 Funding**

1468 This study was supported by funding to the Blue Brain Project, a research center of the École Poly-

1469 technique Fédérale de Lausanne (EPFL), from the Swiss government's ETH Board of the Swiss Federal

1470 Institutes of Technology.

1471 Funding was also provided by The Human Brain Project through the European Union Seventh Framework

1472 Program (FP7/2007-2013) under grant agreement no. 604102 (HBP) and from the European Union's

1473 Horizon 2020 Framework Programme for Research and Innovation under the Specific Grant Agreements

1474 No. 720270 (Human Brain Project SGA1) and No. 785907 (Human Brain Project SGA2). M.M. also  
1475 acknowledges funding for this work from the EU Grant Agreement No. 945539 (Human Brain Project  
1476 SGA3), the Flag ERA JTC 2019 (MILEDI Project), the Fenix computing and storage resources under  
1477 the Specific Grant Agreement No. 800858 (Human Brain Project ICEI), and a grant from the Swiss  
1478 National Supercomputing Centre (CSCS) under project ID ich002 and ich011. S.K. and S.S. were  
1479 supported by the the European Union project RRF-2.3.1-21-2022-00004 within the framework of the  
1480 Hungarian Artificial Intelligence National Laboratory. The Wellcome Trust, Medical Research Council  
1481 (UK), Novartis Pharma and the Human Brain Project funded J.F., S.L., A.M., A.M.T.

## 1482 **6 Acknowledgments**

### 1483 **6.1 Author contributions**

1484 H.M. conceived and led the study. S.K., M.M., A.T., F.S., E.M., and A.M. co-led the study. A.M.T. and  
1485 A.M. planned, performed and supervised electrophysiological experiments and neuron reconstructions.  
1486 J.F. and S.L. performed reconstructions. A.R., J.B., A.A., D.B., K.K. planned and supervised on data  
1487 integration, strategies and algorithms, model building, simulation experiments, and analysis. A.A., J.B.,  
1488 D.B., A.R. reconstructed Schaffer collaterals. A.A., C.C., J.B., A.R. modeled Acetylcholine. J.B. and  
1489 A.R. worked on theta. A.A., J.B. and A.R. worked on oscillation propagation. F.S. and J-D.C. planned  
1490 and supervised the development of algorithms, software and workflows, computing infrastructure, and  
1491 technical integration. A.R., J.B., A.A., D.B., C.C., K.K. wrote the manuscript. A detailed listing of  
1492 author contributions is available in the Supplemental materials.

### 1493 **6.2 Acknowledgments**

1494 The authors would like to thank all the people involved in the rat CA1 hippocampus project over the last  
1495 years, in particular Attila Gulyás, Luc Guyot, and Arseny Povolotsky. We would also like to thank those  
1496 who offered valuable advice or data: Giorgio Ascoli, Norbert Hájos, Jesse Jackson, Corette Wierenga,  
1497 Sylvain Williams. Experimentalists who generated data for this project or who recorded, dye-filled and/or  
1498 reconstructed neurons: A.B. Ali, A.P Bannister, R. Begum, N. Botcher, J. Deuchars, K. Eastlake, D.  
1499 I. Hughes, M. Ilia, J. Kerkhoff, S. Kirchhecker, H. Pawelzik, and H. Trigg. D.C. West designed data  
1500 collection and analysis software. We thank those who worked on the Explore feature of the Hippocampus  
1501 hub: Anil Tuncel, Pavlo Getta, Caitlin Monney, Stefano Antonel, Alexander Dietz, and Liviu Soltuzu.  
1502 Finally, we are indebted to Karin Holm for copy editing and publication advice and support.

## 1503 **7 Software used**

1504 Table 1 gives a list of software used in the paper.



| Software Name           | Source                            | Identifier                                                                                                              |
|-------------------------|-----------------------------------|-------------------------------------------------------------------------------------------------------------------------|
| atlas-direction-vectors | BBP/EPFL software package         | <a href="https://github.com/BlueBrain/atlas-direction-vectors">https://github.com/BlueBrain/atlas-direction-vectors</a> |
| bbp-workflow            | BBP/EPFL software package         | not yet open source                                                                                                     |
| BluePy                  | BBP/EPFL software package         | not yet open source                                                                                                     |
| BluePySNAP              | BBP/EPFL software package         | <a href="https://github.com/BlueBrain/snap">https://github.com/BlueBrain/snap</a>                                       |
| BluePyEfe               | BBP/EPFL software package         | <a href="https://github.com/BlueBrain/BluePyEfe">https://github.com/BlueBrain/BluePyEfe</a>                             |
| BluePyOpt               | BBP/EPFL software package         | <a href="https://github.com/BlueBrain/BluePyOpt">https://github.com/BlueBrain/BluePyOpt</a>                             |
| BluePyMM                | BBP/EPFL software package         | <a href="https://github.com/BlueBrain/BluePyMM">https://github.com/BlueBrain/BluePyMM</a>                               |
| Brainbuilder            | BBP/EPFL software package         | not yet open source                                                                                                     |
| Brayns                  | BBP/EPFL software package         | <a href="https://github.com/BlueBrain/Brayns">https://github.com/BlueBrain/Brayns</a>                                   |
| circuit-build           | BBP/EPFL software package         | not yet open source                                                                                                     |
| CoreNEURON              | BBP/EPFL software package         | <a href="https://github.com/BlueBrain/CoreNeuron">https://github.com/BlueBrain/CoreNeuron</a>                           |
| eFEL                    | BBP/EPFL software package         | <a href="https://github.com/BlueBrain/eFEL">https://github.com/BlueBrain/eFEL</a>                                       |
| Elephant                | Elephant authors and contributors | <a href="https://doi.org/10.5281/zenodo.1186602">https://doi.org/10.5281/zenodo.1186602</a>                             |
| EMSim                   | BBP/EPFL software package         | <a href="https://github.com/BlueBrain/EMSim">https://github.com/BlueBrain/EMSim</a>                                     |
| Hippounit               | KOKI software package             | <a href="https://github.com/KaliLab/hippounit">https://github.com/KaliLab/hippounit</a>                                 |
| ITK-SNAP                | University of Pennsylvania        | <a href="http://www.itksnap.org/">http://www.itksnap.org/</a>                                                           |
| morphology-workflows    | BBP/EPFL software package         | <a href="https://github.com/BlueBrain/morphology-workflows">https://github.com/BlueBrain/morphology-workflows</a>       |
| mtspec                  | pypi python package               | <a href="https://pypi.org/project/mtspec/">https://pypi.org/project/mtspec/</a>                                         |
| neo                     | The NeuralEnsemble Initiative     | <a href="https://github.com/NeuralEnsemble/python-neo">https://github.com/NeuralEnsemble/python-neo</a>                 |
| Neurodamus              | BBP/EPFL software package         | <a href="https://github.com/BlueBrain/neurodamus">https://github.com/BlueBrain/neurodamus</a>                           |
| NeuroMorphoVis          | BBP/EPFL software package         | <a href="https://github.com/BlueBrain/NeuroMorphoVis">https://github.com/BlueBrain/NeuroMorphoVis</a>                   |
| NeuroM                  | BBP/EPFL software package         | <a href="https://github.com/BlueBrain/NeuroM">https://github.com/BlueBrain/NeuroM</a>                                   |
| NeuroR                  | BBP/EPFL software package         | <a href="https://github.com/BlueBrain/NeuroR">https://github.com/BlueBrain/NeuroR</a>                                   |
| projectionizer          | BBP/EPFL software package         | not yet open source                                                                                                     |
| psp-validation          | BBP/EPFL software package         | not yet open source                                                                                                     |
| regiodesics             | BBP/EPFL software package         | not yet open source                                                                                                     |
| TMD                     | BBP/EPFL software package         | <a href="https://github.com/BlueBrain/TMD">https://github.com/BlueBrain/TMD</a>                                         |
| voxcell                 | BBP/EPFL software package         | <a href="https://github.com/BlueBrain/voxcell">https://github.com/BlueBrain/voxcell</a>                                 |

Table 1: List of software used

## 1505 8 References

- 1506 Jung, R., & Kornmüller, A. E. (1938). Eine methodik der ableitung iokalasierter potentialschwankungen  
1507 aus subcorticalen hirngebieten. *Archiv für Psychiatrie und Nervenkrankheiten*, *109*(1), 1–30.  
1508 <https://doi.org/10.1007/BF02157817>
- 1509 Green, J. D., & Arduini, A. A. (1954). Hippocampal electrical activity in arousal. *J. Neurophysiol.*,  
1510 *17*(6), 533–557. <https://doi.org/10.1152/jn.1954.17.6.533>
- 1511 Grastyan, E., Lissak, K., Madarasz, I., & Donhoffer, H. (1959). Hippocampal electrical activity during  
1512 the development of conditioned reflexes. *Electroencephalogr. Clin. Neurophysiol.*, *11*(3), 409–  
1513 430. [https://doi.org/10.1016/0013-4694\(59\)90040-9](https://doi.org/10.1016/0013-4694(59)90040-9)
- 1514 Vanderwolf, C. H. (1969). Hippocampal electrical activity and voluntary movement in the rat. *Electroen-*  
1515 *cephalogr. Clin. Neurophysiol.*, *26*(4), 407–418. [https://doi.org/10.1016/0013-4694\(69\)90092-](https://doi.org/10.1016/0013-4694(69)90092-3)  
1516 [3](https://doi.org/10.1016/0013-4694(69)90092-3)
- 1517 O'Keefe, J., & Dostrovsky, J. (1971). The hippocampus as a spatial map. preliminary evidence from unit  
1518 activity in the freely-moving rat. *Brain Res.*, *34*(1), 171–175. [https://doi.org/10.1016/0006-](https://doi.org/10.1016/0006-8993(71)90358-1)  
1519 [8993\(71\)90358-1](https://doi.org/10.1016/0006-8993(71)90358-1)
- 1520 Knowles, W. D., & Schwartzkroin, P. A. (1981). Local circuit synaptic interactions in hippocampal brain  
1521 slices [Publisher: Society for Neuroscience Section: Articles]. *Journal of Neuroscience*, *1*(3), 318–  
1522 322. <https://doi.org/10.1523/JNEUROSCI.01-03-00318.1981>
- 1523 Baimbridge, K. G., & Miller, J. J. (1982). Immunohistochemical localization of calcium-binding protein  
1524 in the cerebellum, hippocampal formation and olfactory bulb of the rat. *Brain Research*, *245*(2),  
1525 223–229. [https://doi.org/10.1016/0006-8993\(82\)90804-6](https://doi.org/10.1016/0006-8993(82)90804-6)
- 1526 Morris, R. G., Garrud, P., Rawlins, J. N., & O'Keefe, J. (1982). Place navigation impaired in rats with  
1527 hippocampal lesions. *Nature*, *297*(5868), 681–683. <https://doi.org/10.1038/297681a0>
- 1528 Wilkie, D. (1983). Rayleigh test for randomness of circular data. *J. R. Stat. Soc. Ser. C Appl. Stat.*,  
1529 *32*(3), 311. <https://doi.org/10.2307/2347954>
- 1530 Buzsáki, G., Rappelsberger, P., & Kellényi, L. (1985). Depth profiles of hippocampal rhythmic slow  
1531 activity ('theta rhythm') depend on behaviour. *Electroencephalogr. Clin. Neurophysiol.*, *61*(1),  
1532 77–88. [https://doi.org/10.1016/0013-4694\(85\)91075-2](https://doi.org/10.1016/0013-4694(85)91075-2)
- 1533 Traub, R. D., Miles, R., & Wong, R. S. (1988). Large scale simulations of the hippocampus. *IEEE Eng.*  
1534 *Med. Biol. Mag.*, *7*(4), 31–38. <https://doi.org/10.1109/51.20378>
- 1535 Amaral, D. G., & Witter, M. P. (1989). The three-dimensional organization of the hippocampal forma-  
1536 tion: A review of anatomical data. *Neuroscience*, *31*(3), 571–591. [https://doi.org/10.1016/](https://doi.org/10.1016/0306-4522(89)90424-7)  
1537 [0306-4522\(89\)90424-7](https://doi.org/10.1016/0306-4522(89)90424-7)
- 1538 Sayer, R. J., Friedlander, M. J., & Redman, S. J. (1990). The time course and amplitude of EPSPs  
1539 evoked at synapses between pairs of CA3/CA1 neurons in the hippocampal slice. *The Journal*  
1540 *of Neuroscience: The Official Journal of the Society for Neuroscience*, *10*(3), 826–836.
- 1541 Sheridan, R. D., & Sutor, B. (1990). Presynaptic m1 muscarinic cholinceptors mediate inhibition of  
1542 excitatory synaptic transmission in the hippocampus in vitro. *Neuroscience Letters*, *108*(3),  
1543 273–278. [https://doi.org/10.1016/0304-3940\(90\)90653-Q](https://doi.org/10.1016/0304-3940(90)90653-Q)
- 1544 Williams, S., & Johnston, D. (1990). Muscarinic depression of synaptic transmission at the hippocampal  
1545 mossy fiber synapse. *Journal of Neurophysiology*, *64*(4), 1089–1097. [https://doi.org/10.1152/](https://doi.org/10.1152/jn.1990.64.4.1089)  
1546 [jn.1990.64.4.1089](https://doi.org/10.1152/jn.1990.64.4.1089)

- 1547 Traub, R. D., & Miles, R. (1991). *Neuronal networks of the hippocampus*. Cambridge University Press.  
1548 <https://doi.org/10.1017/cbo9780511895401>
- 1549 Traub, R. D., Miles, R., & Buzsáki, G. (1992). Computer simulation of carbachol-driven rhythmic  
1550 population oscillations in the CA3 region of the in vitro rat hippocampus. *J. Physiol.* <https://doi.org/10.1113/jphysiol.1992.sp019184>
- 1551
- 1552 Sik, A., Tamamaki, N., & Freund, T. F. (1993). Complete axon arborization of a single CA3 pyramidal cell  
1553 in the rat hippocampus, and its relationship with postsynaptic parvalbumin-containing interneu-  
1554 rons. *European Journal of Neuroscience*, 5(12), 1719–1728. [https://doi.org/10.1111/j.1460-](https://doi.org/10.1111/j.1460-9568.1993.tb00239.x)  
1555 [9568.1993.tb00239.x](https://doi.org/10.1111/j.1460-9568.1993.tb00239.x)
- 1556 Aika, Y., Ren, J., Kosaka, K., & Kosaka, T. (1994). Quantitative analysis of GABA-like-immunoreactive  
1557 and parvalbumin-containing neurons in the CA1 region of the rat hippocampus using a stere-  
1558 ological method, the disector. *Experimental Brain Research*, 99(2). [https://doi.org/10.1007/](https://doi.org/10.1007/BF00239593)  
1559 [BF00239593](https://doi.org/10.1007/BF00239593)
- 1560 Bianchi, R., & Wong, R. K. (1994). Carbachol-induced synchronized rhythmic bursts in CA3 neurons  
1561 of guinea pig hippocampus in vitro. *Journal of Neurophysiology*, 72(1), 131–138. [https://doi.](https://doi.org/10.1152/jn.1994.72.1.131)  
1562 [org/10.1152/jn.1994.72.1.131](https://doi.org/10.1152/jn.1994.72.1.131)
- 1563 Buhl, E. H., Han, Z. S., Lorinczi, Z., Stezhka, V. V., Karnup, S. V., & Somogyi, P. (1994). Physio-  
1564 logical properties of anatomically identified axo-axonic cells in the rat hippocampus. *Journal of*  
1565 *Neurophysiology*, 71(4), 1289–1307. <https://doi.org/10.1152/jn.1994.71.4.1289>
- 1566 Buhl, E. H., Halasy, K., & Somogyi, P. (1994). Diverse sources of hippocampal unitary inhibitory  
1567 postsynaptic potentials and the number of synaptic release sites. *Nature*, 368(6474), 823–828.  
1568 <https://doi.org/10.1038/368823a0>
- 1569 Hasselmo, M., & Schnell, E. (1994). Laminar selectivity of the cholinergic suppression of synaptic  
1570 transmission in rat hippocampal region CA1: Computational modeling and brain slice physiology.  
1571 *The Journal of Neuroscience*, 14(6), 3898–3914. [https://doi.org/10.1523/JNEUROSCI.14-06-](https://doi.org/10.1523/JNEUROSCI.14-06-03898.1994)  
1572 [03898.1994](https://doi.org/10.1523/JNEUROSCI.14-06-03898.1994)
- 1573 Li, X.-G., Somogyi, P., Ylinen, A., & Buzsáki, G. (1994). The hippocampal CA3 network: An in vivo  
1574 intracellular labeling study: THE HIPPOCAMPAL CA3 NETWORK. *Journal of Comparative*  
1575 *Neurology*, 339(2), 181–208. <https://doi.org/10.1002/cne.903390204>
- 1576 Bannister, N. J., & Larkman, A. U. (1995). Dendritic morphology of CA1 pyramidal neurones from  
1577 the rat hippocampus: I. branching patterns. *The Journal of Comparative Neurology*, 360(1),  
1578 150–160. <https://doi.org/10.1002/cne.903600111>
- 1579 Debanne, D., Guérineau, N. C., Gähwiler, B. H., & Thompson, S. M. (1995). Physiology and phar-  
1580 macology of unitary synaptic connections between pairs of cells in areas CA3 and CA1 of rat  
1581 hippocampal slice cultures. *J. Neurophysiol.*, 73(3), 1282–1294. [https://doi.org/10.1152/jn.](https://doi.org/10.1152/jn.1995.73.3.1282)  
1582 [1995.73.3.1282](https://doi.org/10.1152/jn.1995.73.3.1282)
- 1583 Sik, A., Penttonen, M., Ylinen, A., & Buzsáki, G. (1995). Hippocampal CA1 interneurons: An in vivo  
1584 intracellular labeling study. *The Journal of Neuroscience*, 15(10), 6651–6665. [https://doi.org/](https://doi.org/10.1523/JNEUROSCI.15-10-06651.1995)  
1585 [10.1523/JNEUROSCI.15-10-06651.1995](https://doi.org/10.1523/JNEUROSCI.15-10-06651.1995)
- 1586 Ylinen, A., Soltész, I., Bragin, A., Penttonen, M., Sik, A., & Buzsáki, G. (1995). Intracellular corre-  
1587 lates of hippocampal theta rhythm in identified pyramidal cells, granule cells, and basket cells.  
1588 *Hippocampus*, 5(1), 78–90. <https://doi.org/10.1002/hipo.450050110>

- 1589 Deuchars, J., & Thomson, A. (1996). CA1 pyramid-pyramid connections in rat hippocampus in vitro:  
1590 Dual intracellular recordings with biocytin filling. *Neuroscience*, *74*(4), 1009–1018. [https://doi.org/10.1016/0306-4522\(96\)00251-5](https://doi.org/10.1016/0306-4522(96)00251-5)  
1591
- 1592 Freund, T., & Buzsáki, G. (1996). Interneurons of the hippocampus. *Hippocampus*, *6*(4), 347–470.  
1593 [https://doi.org/10.1002/\(SICI\)1098-1063\(1996\)6:4<347::AID-HIPO1>3.0.CO;2-I](https://doi.org/10.1002/(SICI)1098-1063(1996)6:4<347::AID-HIPO1>3.0.CO;2-I)
- 1594 Kawasaki, H., & Avoli, M. (1996). Excitatory effects induced by carbachol on bursting neurons of the rat  
1595 subiculum. *Neuroscience Letters*, *219*(1), 1–4. [https://doi.org/10.1016/S0304-3940\(96\)13175-](https://doi.org/10.1016/S0304-3940(96)13175-X)  
1596 X
- 1597 Hájos, N., & Mody, I. (1997). Synaptic communication among hippocampal interneurons: Properties of  
1598 spontaneous IPSCs in morphologically identified cells. *J. Neurosci.*, *17*(21), 8427–8442.
- 1599 Hoffman, D. A., Magee, J. C., Colbert, C. M., & Johnston, D. (1997). K<sup>+</sup> channel regulation of  
1600 signal propagation in dendrites of hippocampal pyramidal neurons. *Nature*, *387*(6636), 869–  
1601 875. <https://doi.org/10.1038/43119>
- 1602 Markram, H., Lübke, J., Frotscher, M., Roth, A., & Sakmann, B. (1997). Physiology and anatomy of  
1603 synaptic connections between thick tufted pyramidal neurones in the developing rat neocortex.  
1604 *The Journal of Physiology*, *500*, 409–440. Retrieved September 21, 2022, from [https://www.](https://www.ncbi.nlm.nih.gov/pmc/articles/PMC1159394/)  
1605 [ncbi.nlm.nih.gov/pmc/articles/PMC1159394/](https://www.ncbi.nlm.nih.gov/pmc/articles/PMC1159394/)
- 1606 Tsodyks, M., & Markram, H. (1997). The neural code between neocortical pyramidal neurons depends on  
1607 neurotransmitter release probability. *Proceedings of the National Academy of Sciences*, *94*(2),  
1608 719–723. <https://doi.org/10.1073/pnas.94.2.719>
- 1609 Williams, J. H., & Kauer, J. A. (1997). Properties of carbachol-induced oscillatory activity in rat hip-  
1610 pocampus. *Journal of Neurophysiology*, *78*(5), 2631–2640. [https://doi.org/10.1152/jn.1997.](https://doi.org/10.1152/jn.1997.78.5.2631)  
1611 78.5.2631
- 1612 Ali, A. B., Deuchars, J., Pawelzik, H., & Thomson, A. M. (1998). CA1 pyramidal to basket and bis-  
1613 tratified cell EPSPs: Dual intracellular recordings in rat hippocampal slices. *J. Physiol.*, *507* (  
1614 *Pt 1*), 201–217.
- 1615 Csicsvari, J., Hirase, H., Czurko, A., & Buzsáki, G. (1998). Reliability and state dependence of pyrami-  
1616 dal cell-interneuron synapses in the hippocampus: An ensemble approach in the behaving rat.  
1617 *Neuron*, *21*(1), 179–189. [https://doi.org/10.1016/s0896-6273\(00\)80525-5](https://doi.org/10.1016/s0896-6273(00)80525-5)
- 1618 Fisahn, A., Pike, F. G., Buhl, E. H., & Paulsen, O. (1998). Cholinergic induction of network oscillations at  
1619 40 hz in the hippocampus in vitro. *Nature*, *394*(6689), 186–189. <https://doi.org/10.1038/28179>
- 1620 Markram, H., Wang, Y., & Tsodyks, M. (1998). Differential signaling via the same axon of neocortical  
1621 pyramidal neurons. *Proceedings of the National Academy of Sciences of the United States of*  
1622 *America*, *95*(9), 5323–5328. <https://doi.org/10.1073/pnas.95.9.5323>
- 1623 Vida, I., Halasy, K., Szinyei, C., Somogyi, P., & Buhl, E. H. (1998). Unitary IPSPs evoked by interneu-  
1624 rons at the stratum radiatum-stratum lacunosum-moleculare border in the CA1 area of the rat  
1625 hippocampus in vitro. *The Journal of Physiology*, *506*(3), 755–773. [https://doi.org/10.1111/j.](https://doi.org/10.1111/j.1469-7793.1998.755bv.x)  
1626 1469-7793.1998.755bv.x
- 1627 Ali, A. B., Bannister, A. P., & Thomson, A. M. (1999). IPSPs elicited in CA1 pyramidal cells by  
1628 putative basket cells in slices of adult rat hippocampus: Basket cell IPSPs in CA1 pyramidal  
1629 cells. *European Journal of Neuroscience*, *11*(5), 1741–1753. [https://doi.org/10.1046/j.1460-](https://doi.org/10.1046/j.1460-9568.1999.00592.x)  
1630 9568.1999.00592.x

- 1631 Csicsvari, J., Hirase, H., Czurkó, A., Mamiya, A., & Buzsáki, G. (1999). Oscillatory coupling of hip-  
1632 pocampal pyramidal cells and interneurons in the behaving rat. *J. Neurosci.*, *19*(1), 274–287.  
1633 <https://doi.org/10.1523/JNEUROSCI.19-01-00274.1999>
- 1634 Esclapez, M., Hirsch, J. C., Ben-Ari, Y., & Bernard, C. (1999a). Newly formed excitatory pathways  
1635 provide a substrate for hyperexcitability in experimental temporal lobe epilepsy. *J. Comp. Neurol.*,  
1636 *408*(4), 449–460. [https://doi.org/10.1002/\(sici\)1096-9861\(19990614\)408:4<449::aid-](https://doi.org/10.1002/(sici)1096-9861(19990614)408:4<449::aid-cne1>3.0.co;2-r)  
1637 [cne1>3.0.co;2-r](https://doi.org/10.1002/(sici)1096-9861(19990614)408:4<449::aid-cne1>3.0.co;2-r)
- 1638 Esclapez, M., Hirsch, J. C., Ben-Ari, Y., & Bernard, C. (1999b). Newly formed excitatory pathways  
1639 provide a substrate for hyperexcitability in experimental temporal lobe epilepsy. *The Jour-*  
1640 *nal of Comparative Neurology*, *408*(4), 449–460. [https://doi.org/10.1002/\(SICI\)1096-](https://doi.org/10.1002/(SICI)1096-9861(19990614)408:4<449::AID-CNE1>3.0.CO;2-R)  
1641 [9861\(19990614\)408:4<449::AID-CNE1>3.0.CO;2-R](https://doi.org/10.1002/(SICI)1096-9861(19990614)408:4<449::AID-CNE1>3.0.CO;2-R)
- 1642 Hoffman, D. A., & Johnston, D. (1999). Neuromodulation of dendritic action potentials. *J. Neurophys-*  
1643 *iol.*, *81*(1), 408–411. <https://doi.org/10.1152/jn.1999.81.1.408>
- 1644 Magee, J. C. (1999). Dendritic Ih normalizes temporal summation in hippocampal CA1 neurons. *Nat.*  
1645 *Neurosci.*, *2*(6), 508–514. <https://doi.org/10.1038/9158>
- 1646 McQuiston, A. R., & Madison, D. V. (1999). Muscarinic receptor activity has multiple effects on the  
1647 resting membrane potentials of CA1 hippocampal interneurons. *The Journal of Neuroscience*,  
1648 *19*(14), 5693–5702. <https://doi.org/10.1523/JNEUROSCI.19-14-05693.1999>
- 1649 Migliore, M., Hoffman, D. A., Magee, J. C., & Johnston, D. (1999). Role of an a-type k<sup>+</sup> conductance  
1650 in the back-propagation of action potentials in the dendrites of hippocampal pyramidal neurons.  
1651 *Journal of Computational Neuroscience*, *7*(1), 5–15. <https://doi.org/10.1023/a:1008906225285>
- 1652 Pawelzik, H., Bannister, A. P., Deuchars, J., Ilia, M., & Thomson, A. M. (1999). Modulation of bistratified  
1653 cell IPSPs and basket cell IPSPs by pentobarbitone sodium, diazepam and zn<sup>2+</sup>: Dual recordings  
1654 in slices of adult rat hippocampus. *European Journal of Neuroscience*, *13*.
- 1655 Cossart, R., Hirsch, J. C., Cannon, R. C., Dinoncourt, C., Wheal, H. V., Ben-Ari, Y., Esclapez, M., &  
1656 Bernard, C. (2000). Distribution of spontaneous currents along the somato-dendritic axis of rat  
1657 hippocampal CA1 pyramidal neurons. *Neuroscience*, *99*(4), 593–603. [https://doi.org/10.1016/](https://doi.org/10.1016/s0306-4522(00)00231-1)  
1658 [s0306-4522\(00\)00231-1](https://doi.org/10.1016/s0306-4522(00)00231-1)
- 1659 Fellous, J. M., & Sejnowski, T. J. (2000). Cholinergic induction of oscillations in the hippocampal slice  
1660 in the slow (0.5–2 Hz), theta (5–12 Hz), and gamma (35–70 Hz) bands. *Hippocampus*, *10*(2),  
1661 187–197. [https://doi.org/10.1002/\(SICI\)1098-1063\(2000\)10:2<187::AID-HIPO8>3.0.CO;2-M](https://doi.org/10.1002/(SICI)1098-1063(2000)10:2<187::AID-HIPO8>3.0.CO;2-M)
- 1662 Hughes, D. I., Bannister, A., Pawelzik, H., & Thomson, A. M. (2000). Double immunofluorescence,  
1663 peroxidase labelling and ultrastructural analysis of interneurons following prolonged electro-  
1664 physiological recordings in vitro. *Journal of Neuroscience Methods*, *101*(2), 107–116. [https://doi.org/10.1016/S0165-0270\(00\)00254-5](https://doi.org/10.1016/S0165-0270(00)00254-5)
- 1665
- 1666 Maccaferri, G., David, J., Roberts, B., Szucs, P., Cottingham, C. A., & Somogyi, P. (2000). Cell  
1667 surface domain specific postsynaptic currents evoked by identified GABAergic neurones in rat  
1668 hippocampus in vitro. *The Journal of Physiology*, *524*(1), 91–116. [https://doi.org/10.1111/j.](https://doi.org/10.1111/j.1469-7793.2000.t01-3-00091.x)  
1669 [1469-7793.2000.t01-3-00091.x](https://doi.org/10.1111/j.1469-7793.2000.t01-3-00091.x)
- 1670 Magee, J. C., & Cook, E. P. (2000). Somatic EPSP amplitude is independent of synapse location in  
1671 hippocampal pyramidal neurons. *Nat. Neurosci.*, *3*(9), 895–903. <https://doi.org/10.1038/78800>



- 1672 Thomson, A. M., Bannister, A. P., Hughes, D. I., & Pawelzik, H. (2000). Differential sensitivity to  
1673 zolpidem of IPSPs activated by morphologically identified CA1 interneurons in slices of rat  
1674 hippocampus: Zolpidem enhancement of basket cell IPSPs in CA1. *European Journal of Neuro-*  
1675 *science*, *12*(2), 425–436. <https://doi.org/10.1046/j.1460-9568.2000.00915.x>
- 1676 Traub, R. D., Bibbig, A., Fisahn, A., LeBeau, F. E., Whittington, M. A., & Buhl, E. H. (2000). A model  
1677 of gamma-frequency network oscillations induced in the rat CA3 region by carbachol in vitro.  
1678 *Eur. J. Neurosci.*, *12*(11), 4093–4106. <https://doi.org/10.1046/j.1460-9568.2000.00300.x>
- 1679 Andrásfalvy, B. K., & Magee, J. C. (2001). Distance-dependent increase in AMPA receptor number  
1680 in the dendrites of adult hippocampal CA1 pyramidal neurons. *The Journal of Neuroscience*,  
1681 *21*(23), 9151–9159. <https://doi.org/10.1523/JNEUROSCI.21-23-09151.2001>
- 1682 Golding, N. L., Kath, W. L., & Spruston, N. (2001). Dichotomy of action-potential backpropagation  
1683 in CA1 pyramidal neuron dendrites. *J. Neurophysiol.*, *86*(6), 2998–3010. <https://doi.org/10.1152/jn.2001.86.6.2998>
- 1684 Harris, E., & Stewart, M. (2001). Propagation of synchronous epileptiform events from subiculum  
1685 backward into area CA1 of rat brain slices. *Brain Res.*, *895*(1-2), 41–49. [https://doi.org/10.1016/s0006-8993\(01\)02023-6](https://doi.org/10.1016/s0006-8993(01)02023-6)
- 1686 Megias, M., Emri, Z., Freund, T., & Gulyas, A. (2001). Total number and distribution of inhibitory  
1687 and excitatory synapses on hippocampal CA1 pyramidal cells. *Neuroscience*, *102*(3), 527–540.  
1688 [https://doi.org/10.1016/S0306-4522\(00\)00496-6](https://doi.org/10.1016/S0306-4522(00)00496-6)
- 1689 Pouille, F., & Scanziani, M. (2001). Enforcement of temporal fidelity in pyramidal cells by somatic  
1690 feed-forward inhibition. *Science (New York, N.Y.)*, *293*(5532), 1159–1163. <https://doi.org/10.1126/science.1060342>
- 1691 Buzsáki, G. (2002). Theta oscillations in the hippocampus. *Neuron*, *33*(3), 325–340. [https://doi.org/10.1016/s0896-6273\(02\)00586-x](https://doi.org/10.1016/s0896-6273(02)00586-x)
- 1692 Fuhrmann, G., Segev, I., Markram, H., & Tsodyks, M. (2002). Coding of temporal information by  
1693 activity-dependent synapses. *Journal of Neurophysiology*, *87*(1), 140–148. <https://doi.org/10.1152/jn.00258.2001>
- 1694 Pawelzik, H., Hughes, D. I., & Thomson, A. M. (2002). Physiological and morphological diversity of  
1695 immunocytochemically defined parvalbumin- and cholecystokinin-positive interneurons in CA1  
1696 of the adult rat hippocampus. *The Journal of Comparative Neurology*, *443*(4), 346–367. <https://doi.org/10.1002/cne.10118>
- 1697 Sevilla, D. F., Cabezas, C., Prada, A. N. O., Sánchez-Jiménez, A., & Buño, W. (2002). Selective mus-  
1698 carinic regulation of functional glutamatergic schaffer collateral synapses in rat CA1 pyramidal  
1699 neurons. *The Journal of Physiology*, *545*(1), 51–63. <https://doi.org/10.1113/jphysiol.2002.029165>
- 1700 Klausberger, T., Magill, P. J., Márton, L. F., Roberts, J. D. B., Cobden, P. M., Buzsáki, G., & Somogyi,  
1701 P. (2003). Brain-state- and cell-type-specific firing of hippocampal interneurons in vivo. *Nature*,  
1702 *421*(6925), 844–848. <https://doi.org/10.1038/nature01374>
- 1703 Wierenga, C. J., & Wadman, W. J. (2003). Excitatory inputs to CA1 interneurons show selective synaptic  
1704 dynamics. *Journal of Neurophysiology*, *90*(2), 811–821. <https://doi.org/10.1152/jn.00865.2002>
- 1705 Agoston, M. K. (2004). *Computer graphics and geometric modeling: Implementation and algorithms*.  
1706 Springer.



- 1714 Klausberger, T., Márton, L. F., Baude, A., Roberts, J. D. B., Magill, P. J., & Somogyi, P. (2004). Spike  
1715 timing of dendrite-targeting bistratified cells during hippocampal network oscillations in vivo.  
1716 *Nature Neuroscience*, 7(1), 41–47. <https://doi.org/10.1038/nn1159>
- 1717 Biro, A. A. (2005). Quantal size is independent of the release probability at hippocampal excitatory  
1718 synapses. *Journal of Neuroscience*, 25(1), 223–232. [https://doi.org/10.1523/JNEUROSCI.](https://doi.org/10.1523/JNEUROSCI.3688-04.2005)  
1719 3688-04.2005
- 1720 Buzsáki, G. (2005). Theta rhythm of navigation: Link between path integration and landmark navigation,  
1721 episodic and semantic memory. *Hippocampus*, 15(7), 827–840. [https://doi.org/10.1002/hipo.](https://doi.org/10.1002/hipo.20113)  
1722 20113
- 1723 Klausberger, T. (2005). Complementary roles of cholecystokinin- and parvalbumin-expressing GABAergic  
1724 neurons in hippocampal network oscillations. *Journal of Neuroscience*, 25(42), 9782–9793. <https://doi.org/10.1523/JNEUROSCI.3269-05.2005>
- 1725
- 1726 Migliore, M., Ferrante, M., & Ascoli, G. A. (2005). Signal propagation in oblique dendrites of CA1  
1727 pyramidal cells. *J. Neurophysiol.*, 94(6), 4145–4155. <https://doi.org/10.1152/jn.00521.2005>
- 1728 Siapas, A. G., Lubenov, E. V., & Wilson, M. A. (2005). Prefrontal phase locking to hippocampal theta  
1729 oscillations. *Neuron*, 46(1), 141–151. <https://doi.org/10.1016/j.neuron.2005.02.028>
- 1730 Glickfeld, L. L., & Scanziani, M. (2006). Distinct timing in the activity of cannabinoid-sensitive and  
1731 cannabinoid-insensitive basket cells. *Nature Neuroscience*, 9(6), 807–815. [https://doi.org/10.](https://doi.org/10.1038/nn1688)  
1732 1038/nn1688
- 1733 Hasselmo, M. E. (2006). The role of acetylcholine in learning and memory. *Current Opinion in Neuro-*  
1734 *biology*, 16(6), 710–715. <https://doi.org/10.1016/j.conb.2006.09.002>
- 1735 Lawrence, J. J., Statland, J. M., Grinspan, Z. M., & McBain, C. J. (2006). Cell type-specific dependence  
1736 of muscarinic signalling in mouse hippocampal stratum oriens interneurons: mAChR modulation  
1737 of str. oriens interneurons. *The Journal of Physiology*, 570(3), 595–610. [https://doi.org/10.](https://doi.org/10.1113/jphysiol.2005.100875)  
1738 1113/jphysiol.2005.100875
- 1739 Mercer, A., Bannister, A. P., & Thomson, A. M. (2006). Electrical coupling between pyramidal cells in  
1740 adult cortical regions. *Brain Cell Biol.*, 35(1), 13–27. [https://doi.org/10.1007/s11068-006-](https://doi.org/10.1007/s11068-006-9005-9)  
1741 9005-9
- 1742 Sasaki, T., Kimura, R., Tsukamoto, M., Matsuki, N., & Ikegaya, Y. (2006). Integrative spike dynamics  
1743 of rat CA1 neurons: A multineuronal imaging study. *The Journal of Physiology*, 574, 195–208.  
1744 <https://doi.org/10.1113/jphysiol.2006.108480>
- 1745 Sniedovich, M. (2006). Dijkstra's algorithm revisited: The dynamic programming connexion. *Control*  
1746 *and Cybernetics*, 599–620. Retrieved August 2, 2022, from [https://www.infona.pl//resource/](https://www.infona.pl//resource/bwmeta1.element.baztech-article-BAT5-0013-0005)  
1747 [bwmeta1.element.baztech-article-BAT5-0013-0005](https://www.infona.pl//resource/bwmeta1.element.baztech-article-BAT5-0013-0005)
- 1748 Neu, A., Földy, C., & Soltesz, I. (2007). Postsynaptic origin of CB1-dependent tonic inhibition of GABA  
1749 release at cholecystokinin-positive basket cell to pyramidal cell synapses in the CA1 region of the  
1750 rat hippocampus. *The Journal of Physiology*, 578, 233–247. [https://doi.org/10.1113/jphysiol.](https://doi.org/10.1113/jphysiol.2006.115691)  
1751 2006.115691
- 1752 Wittner, L., Henze, D. A., Záborszky, L., & Buzsáki, G. (2007). Three-dimensional reconstruction of  
1753 the axon arbor of a CA3 pyramidal cell recorded and filled in vivo. *Brain Structure and Function*,  
1754 212(1), 75–83. <https://doi.org/10.1007/s00429-007-0148-y>

- 1755 Ali, A. B., & Thomson, A. M. (2008). Synaptic alpha 5 subunit-containing GABAA receptors mediate  
1756 IPSPs elicited by dendrite-preferring cells in rat neocortex. *Cereb. Cortex*, *18*(6), 1260–1271.
- 1757 Elfant, D., Pál, B. Z., Emptage, N., & Capogna, M. (2008). Specific inhibitory synapses shift the balance  
1758 from feedforward to feedback inhibition of hippocampal CA1 pyramidal cells. *The European*  
1759 *Journal of Neuroscience*, *27*(1), 104–113. <https://doi.org/10.1111/j.1460-9568.2007.06001.x>
- 1760 Fuentealba, P., Begum, R., Capogna, M., Jinno, S., Márton, L. F., Csicsvari, J., Thomson, A., Somogyi,  
1761 P., & Klausberger, T. (2008). Ivy cells: A population of nitric-oxide-producing, slow-spiking  
1762 GABAergic neurons and their involvement in hippocampal network activity. *Neuron*, *57*(6),  
1763 917–929. <https://doi.org/10.1016/j.neuron.2008.01.034>
- 1764 Petilla Interneuron Nomenclature Group, Ascoli, G. A., Alonso-Nanclares, L., Anderson, S. A., Bar-  
1765 rionuevo, G., Benavides-Piccione, R., Burkhalter, A., Buzsáki, G., Cauli, B., Defelipe, J., Fairén,  
1766 A., Feldmeyer, D., Fishell, G., Fregnac, Y., Freund, T. F., Gardner, D., Gardner, E. P., Goldberg,  
1767 J. H., Helmstaedter, M., ... Yuste, R. (2008). Petilla terminology: Nomenclature of features  
1768 of GABAergic interneurons of the cerebral cortex. *Nat. Rev. Neurosci.*, *9*(7), 557–568. <https://doi.org/10.1038/nrn2402>
- 1770 Shah, M. M., Migliore, M., Valencia, I., Cooper, E. C., & Brown, D. A. (2008). Functional significance  
1771 of axonal kv7 channels in hippocampal pyramidal neurons. *Proc. Natl. Acad. Sci. U. S. A.*,  
1772 *105*(22), 7869–7874. <https://doi.org/10.1073/pnas.0802805105>
- 1773 Sirota, A., Montgomery, S., Fujisawa, S., Isomura, Y., Zugaro, M., & Buzsáki, G. (2008). Entrainment  
1774 of neocortical neurons and gamma oscillations by the hippocampal theta rhythm. *Neuron*, *60*(4),  
1775 683–697. <https://doi.org/10.1016/j.neuron.2008.09.014>
- 1776 Addison, P., Walker, J., & Guido, R. (2009). Time–frequency analysis of biosignals. *IEEE Eng. Med.*  
1777 *Biol. Mag.*, *28*(5), 14–29. <https://doi.org/10.1109/MEMB.2009.934244>
- 1778 Anwar, H., Riachi, I., Hill, S., Schürmann, F., & Markram, H. (2009). An approach to capturing neuron  
1779 morphological diversity. In *Computational modeling methods for neuroscientists* (pp. 211–232).  
1780 The MIT Press. <https://doi.org/10.7551/mitpress/9780262013277.003.0010>
- 1781 Goutagny, R., Jackson, J., & Williams, S. (2009). Self-generated theta oscillations in the hippocampus.  
1782 *Nature Neuroscience*, *12*(12), 1491–1493. <https://doi.org/10.1038/nn.2440>
- 1783 Hangya, B., Borhegyi, Z., Szilágyi, N., Freund, T. F., & Varga, V. (2009). GABAergic neurons of the  
1784 medial septum lead the hippocampal network during theta activity. *The Journal of Neuroscience:*  
1785 *The Official Journal of the Society for Neuroscience*, *29*(25), 8094–8102. <https://doi.org/10.1523/JNEUROSCI.5665-08.2009>
- 1787 Ito, H. T., & Schuman, E. M. (2009). Distance-dependent homeostatic synaptic scaling mediated by  
1788 a-type potassium channels. *Front. Cell. Neurosci.*, *3*, 15. <https://doi.org/10.3389/neuro.03.015.2009>
- 1789
- 1790 Pouille, F., Marin-Burgin, A., Adesnik, H., Atallah, B. V., & Scanziani, M. (2009). Input normalization  
1791 by global feedforward inhibition expands cortical dynamic range. *Nature Neuroscience*, *12*(12),  
1792 1577–1585. <https://doi.org/10.1038/nn.2441>
- 1793 Prieto, G. A., Parker, R. L., & Vernon, F. L., III. (2009). A fortran 90 library for multitaper spectrum  
1794 analysis. *Comput. Geosci.*, *35*(8), 1701–1710. <https://doi.org/10.1016/j.cageo.2008.06.007>
- 1795 Rockström, J., Steffen, W., Noone, K., Persson, Å., Chapin, F. S., Lambin, E. F., Lenton, T. M., Scheffer,  
1796 M., Folke, C., Schellnhuber, H. J., Nykvist, B., de Wit, C. A., Hughes, T., van der Leeuw, S.,

- 1797 Rodhe, H., Sörlin, S., Snyder, P. K., Costanza, R., Svedin, U., . . . Foley, J. A. (2009). A safe  
1798 operating space for humanity. *Nature*, *461*(7263), 472–475. <https://doi.org/10.1038/461472a>
- 1799 Ascoli, G. A., Gasparini, S., Medinilla, V., & Migliore, M. (2010). Local control of postinhibitory rebound  
1800 spiking in CA1 pyramidal neuron dendrites. *The Journal of Neuroscience: The Official Journal of*  
1801 *the Society for Neuroscience*, *30*(18), 6434–6442. [https://doi.org/10.1523/JNEUROSCI.4066-  
1802 \*09.2010\*](https://doi.org/10.1523/JNEUROSCI.4066-09.2010)
- 1803 Bokil, H., Andrews, P., Kulkarni, J. E., Mehta, S., & Mitra, P. P. (2010). Chronux: A platform for  
1804 analyzing neural signals. *J. Neurosci. Methods*, *192*(1), 146–151. [https://doi.org/10.1016/j.](https://doi.org/10.1016/j.jneumeth.2010.06.020)  
1805 [jneumeth.2010.06.020](https://doi.org/10.1016/j.jneumeth.2010.06.020)
- 1806 Buchanan, K. A., Petrovic, M. M., Chamberlain, S. E., Marrion, N. V., & Mellor, J. R. (2010). Facil-  
1807 itation of long-term potentiation by muscarinic m1 receptors is mediated by inhibition of SK  
1808 channels. *Neuron*, *68*(5), 948–963. <https://doi.org/10.1016/j.neuron.2010.11.018>
- 1809 Cutsuridis, V., Cobb, S., & Graham, B. P. (2010). Encoding and retrieval in a model of the hippocampal  
1810 CA1 microcircuit. *Hippocampus*, *20*(3), 423–446. <https://doi.org/10.1002/hipo.20661>
- 1811 Földy, C., Lee, S.-H., Morgan, R. J., & Soltesz, I. (2010). Regulation of fast-spiking basket cell synapses  
1812 by the chloride channel ClC-2. *Nature Neuroscience*, *13*(9), 1047–1049. [https://doi.org/10.](https://doi.org/10.1038/nn.2609)  
1813 [1038/nn.2609](https://doi.org/10.1038/nn.2609)
- 1814 Giaume, C., Koulakoff, A., Roux, L., Holcman, D., & Rouach, N. (2010). Astroglial networks: A step  
1815 further in neuroglial and gliovascular interactions. *Nat. Rev. Neurosci.*, *11*(2), 87–99. <https://doi.org/10.1038/nrn2757>
- 1817 Hu, H., Martina, M., & Jonas, P. (2010). Dendritic mechanisms underlying rapid synaptic activation  
1818 of fast-spiking hippocampal interneurons. *Science (New York, N.Y.)*, *327*(5961), 52–58. <https://doi.org/10.1126/science.1177876>
- 1819
- 1820 Lee, S.-H., Foldy, C., & Soltesz, I. (2010). Distinct endocannabinoid control of GABA release at periso-  
1821 matic and dendritic synapses in the hippocampus. *Journal of Neuroscience*, *30*(23), 7993–8000.  
1822 <https://doi.org/10.1523/jneurosci.6238-09.2010>
- 1823 Morse, T. M., Carnevale, N. T., Mutalik, P. G., Migliore, M., & Shepherd, G. M. (2010). Abnormal  
1824 excitability of oblique dendrites implicated in early alzheimer's: A computational study. *Frontiers*  
1825 *in Neural Circuits*, *4*, 16. <https://doi.org/10.3389/fncir.2010.00016>
- 1826 Szabó, G. G., Holderith, N., Gulyás, A. I., Freund, T. F., & Hájos, N. (2010). Distinct synaptic properties  
1827 of perisomatic inhibitory cell types and their different modulation by cholinergic receptor activa-  
1828 tion in the CA3 region of the mouse hippocampus: Synaptic properties of perisomatic interneu-  
1829 rons. *European Journal of Neuroscience*, *31*(12), 2234–2246. [https://doi.org/10.1111/j.1460-](https://doi.org/10.1111/j.1460-9568.2010.07292.x)  
1830 [9568.2010.07292.x](https://doi.org/10.1111/j.1460-9568.2010.07292.x)
- 1831 Zhang, H., Lin, S.-C., & Nicolelis, M. A. L. (2010). Spatiotemporal coupling between hippocampal  
1832 acetylcholine release and theta oscillations in vivo. *The Journal of Neuroscience*, *30*(40), 13431–  
1833 *13440*. <https://doi.org/10.1523/jneurosci.1144-10.2010>
- 1834 Ali, A. B. (2011). CB1 modulation of temporally distinct synaptic facilitation among local circuit in-  
1835 terneurons mediated by n-type calcium channels in CA1. *Journal of Neurophysiology*, *105*(3),  
1836 *1051–1062*. <https://doi.org/10.1152/jn.00831.2010>
- 1837 Cea-del Rio, C. A., Lawrence, J. J., Erdelyi, F., Szabó, G., & McBain, C. J. (2011). Cholinergic modu-  
1838 lation amplifies the intrinsic oscillatory properties of CA1 hippocampal cholecystinin-positive

- 1839 interneurons: Cholinergic modulation and CA1 cholecystokinin-positive interneurons. *The Jour-*  
1840 *nal of Physiology*, 589(3), 609–627. <https://doi.org/10.1113/jphysiol.2010.199422>
- 1841 Dasari, S., & Gullledge, A. T. (2011). M1 and m4 receptors modulate hippocampal pyramidal neurons.  
1842 *Journal of Neurophysiology*, 105(2), 779–792. <https://doi.org/10.1152/jn.00686.2010>
- 1843 Deguchi, Y., Donato, F., Galimberti, I., Cabuy, E., & Caroni, P. (2011). Temporally matched subpopu-  
1844 lations of selectively interconnected principal neurons in the hippocampus. *Nature Neuroscience*,  
1845 14(4), 495–504. <https://doi.org/10.1038/nn.2768>
- 1846 Mizuseki, K., Diba, K., Pastalkova, E., & Buzsáki, G. (2011). Hippocampal CA1 pyramidal cells form  
1847 functionally distinct sublayers. *Nature Neuroscience*, 14(9), 1174–1181. [https://doi.org/10.](https://doi.org/10.1038/nn.2894)  
1848 1038/nn.2894
- 1849 Slomianka, L., Amrein, I., Knuesel, I., Sørensen, J. C., & Wolfner, D. P. (2011). Hippocampal pyramidal  
1850 cells: The reemergence of cortical lamination. *Brain Structure & Function*, 216(4), 301–317.  
1851 <https://doi.org/10.1007/s00429-011-0322-0>
- 1852 Belluscio, M. A., Mizuseki, K., Schmidt, R., Kempter, R., & Buzsáki, G. (2012). Cross-frequency phase-  
1853 phase coupling between theta and gamma oscillations in the hippocampus. *J. Neurosci.*, 32(2),  
1854 423–435. <https://doi.org/10.1523/JNEUROSCI.4122-11.2012>
- 1855 Graves, A. R., Moore, S. J., Bloss, E. B., Mensh, B. D., Kath, W. L., & Spruston, N. (2012). Hippocampal  
1856 pyramidal neurons comprise two distinct cell types that are countermodulated by metabotropic  
1857 receptors. *Neuron*, 76(4), 776–789. <https://doi.org/10.1016/j.neuron.2012.09.036>
- 1858 Potworowski, J., Jakuczun, W., Leski, S., & Wojcik, D. (2012). Kernel current source density method.  
1859 *Neural Comput.*, 24(2), 541–575. [https://doi.org/10.1162/NECO\\_a\\_00236](https://doi.org/10.1162/NECO_a_00236)
- 1860 Ropireddy, D., Bachus, S., & Ascoli, G. (2012). Non-homogeneous stereological properties of the rat  
1861 hippocampus from high-resolution 3d serial reconstruction of thin histological sections. *Neuro-*  
1862 *science*, 205, 91–111. <https://doi.org/10.1016/j.neuroscience.2011.12.055>
- 1863 Szirmai, I., Buzsáki, G., & Kamondi, A. (2012). 120 years of hippocampal schaffer collaterals. *Hip-*  
1864 *pocampus*, 22(7), 1508–1516. <https://doi.org/10.1002/hipo.22001>
- 1865 Takács, V. T., Klausberger, T., Somogyi, P., Freund, T. F., & Gulyás, A. I. (2012). Extrinsic and local  
1866 glutamatergic inputs of the rat hippocampal CA1 area differentially innervate pyramidal cells  
1867 and interneurons. *Hippocampus*, 22(6), 1379–1391. <https://doi.org/10.1002/hipo.20974>
- 1868 Bezaire, M. J., & Soltesz, I. (2013). Quantitative assessment of CA1 local circuits: Knowledge base  
1869 for interneuron-pyramidal cell connectivity: Quantitative assessment of ca1 local circuits. *Hip-*  
1870 *pocampus*, 23(9), 751–785. <https://doi.org/10.1002/hipo.22141>
- 1871 Colgin, L. L. (2013). Mechanisms and functions of theta rhythms. *Annual Review of Neuroscience*, 36,  
1872 295–312. <https://doi.org/10.1146/annurev-neuro-062012-170330>
- 1873 Hood, L., & Rowen, L. (2013). The human genome project: Big science transforms biology and medicine.  
1874 *Genome Medicine*, 5(9), 79. <https://doi.org/10.1186/gm483>
- 1875 Le Roux, N., Cabezas, C., Böhm, U. L., & Poncer, J. C. (2013). Input-specific learning rules at excitatory  
1876 synapses onto hippocampal parvalbumin-expressing interneurons. *The Journal of Physiology*,  
1877 591(7), 1809–1822. <https://doi.org/10.1113/jphysiol.2012.245852>
- 1878 Teles-Grilo Ruivo, L. M., & Mellor, J. R. (2013). Cholinergic modulation of hippocampal network func-  
1879 tion. *Front. Synaptic Neurosci.*, 5, 2. <https://doi.org/10.3389/fnsyn.2013.00002>

- 1880 Zemankovics, R., Veres, J. M., Oren, I., & Hajos, N. (2013). Feedforward inhibition underlies the prop-  
1881 agation of cholinergically induced gamma oscillations from hippocampal CA3 to CA1. *Journal*  
1882 *of Neuroscience*, *33*(30), 12337–12351. <https://doi.org/10.1523/JNEUROSCI.3680-12.2013>
- 1883 Lee, S.-H., Marchionni, I., Bezaire, M., Varga, C., Danielson, N., Lovett-Barron, M., Losonczy, A., &  
1884 Soltesz, I. (2014). Parvalbumin-positive basket cells differentiate among hippocampal pyramidal  
1885 cells. *Neuron*, *82*(5), 1129–1144. <https://doi.org/10.1016/j.neuron.2014.03.034>
- 1886 Pietersen, A. N. J., Ward, P. D., Hagger-Vaughan, N., Wiggins, J., Jefferys, J. G. R., & Vreugdenhil, M.  
1887 (2014). Transition between fast and slow gamma modes in rat hippocampus area CA1 in vitro  
1888 is modulated by slow CA3 gamma oscillations. *The Journal of Physiology*, *592*(4), 605–620.  
1889 <https://doi.org/10.1113/jphysiol.2013.263889>
- 1890 Sun, Y., Nguyen, A. Q., Nguyen, J. P., Le, L., Saur, D., Choi, J., Callaway, E. M., & Xu, X. (2014).  
1891 Cell-type-specific circuit connectivity of hippocampal CA1 revealed through cre-dependent rabies  
1892 tracing. *Cell Reports*, *7*(1), 269–280. <https://doi.org/10.1016/j.celrep.2014.02.030>
- 1893 Szigeti, B., Gleeson, P., Vella, M., Khayrulin, S., Palyanov, A., Hokanson, J., Currie, M., Cantarelli, M.,  
1894 Idili, G., & Larson, S. (2014). OpenWorm: An open-science approach to modeling caenorhabditis  
1895 elegans. *Front. Comput. Neurosci.*, *8*, 137. <https://doi.org/10.3389/fncom.2014.00137>
- 1896 Vandecasteele, M., Varga, V., Berényi, A., Papp, E., Barthó, P., Venance, L., Freund, T. F., & Buzsáki,  
1897 G. (2014). Optogenetic activation of septal cholinergic neurons suppresses sharp wave ripples  
1898 and enhances theta oscillations in the hippocampus. *Proceedings of the National Academy of*  
1899 *Sciences*, *111*(37), 13535–13540. <https://doi.org/10.1073/pnas.1411233111>
- 1900 Yang, S., Yang, S., Moreira, T., Hoffman, G., Carlson, G. C., Bender, K. J., Alger, B. E., & Tang, C.-M.  
1901 (2014). Interlamellar CA1 network in the hippocampus. *Proceedings of the National Academy*  
1902 *of Sciences of the United States of America*, *111*(35), 12919–12924. <https://doi.org/10.1073/pnas.1405468111>
- 1903
- 1904 Aad, G., & Abbott, B. (2015). Combined measurement of the Higgs boson mass in  $pp$  collisions at  
1905  $\sqrt{s} = 7$  and 8 TeV with the ATLAS and CMS experiments. *Physical Review Letters*, *114*(19).  
1906 <https://doi.org/10.1103/physrevlett.114.191803>
- 1907 Markram, H., Muller, E., Ramaswamy, S., Reimann, M. W., Abdellah, M., Sanchez, C. A., Ailamaki,  
1908 A., Alonso-Nanclares, L., Antille, N., Arsever, S., Kahou, G. A. A., Berger, T. K., Bilgili, A.,  
1909 Buncic, N., Chalimourda, A., Chindemi, G., Courcol, J.-D., Delalondre, F., Delattre, V., ...  
1910 Gidon, A. (2015). Reconstruction and simulation of neocortical microcircuitry. *Cell*, *163*(2),  
1911 456–492. <https://doi.org/10.1016/j.cell.2015.09.029>
- 1912 Milstein, A. D., Bloss, E. B., Apostolides, P. F., Vaidya, S. P., Dilly, G. A., Zemelman, B. V., & Magee,  
1913 J. C. (2015). Inhibitory gating of input comparison in the CA1 microcircuit. *Neuron*, *87*(6),  
1914 1274–1289. <https://doi.org/10.1016/j.neuron.2015.08.025>
- 1915 Reimann, M. W., King, J. G., Muller, E. B., Ramaswamy, S., & Markram, H. (2015). An algorithm  
1916 to predict the connectome of neural microcircuits. *Frontiers in Computational Neuroscience*, *9*.  
1917 <https://doi.org/10.3389/fncom.2015.00120>
- 1918 Wheeler, D. W., White, C. M., Rees, C. L., Komendantov, A. O., Hamilton, D. J., & Ascoli, G. A.  
1919 (2015). Hippocampome.org: A knowledge base of neuron types in the rodent hippocampus  
1920 (F. K. Skinner, Ed.) [Publisher: eLife Sciences Publications, Ltd]. *eLife*, *4*, e09960. <https://doi.org/10.7554/eLife.09960>
- 1921



- 1922 Bezaire, M. J., Raikov, I., Burk, K., Vyas, D., & Soltesz, I. (2016). Interneuronal mechanisms of hip-  
1923 pocampal theta oscillations in a full-scale model of the rodent CA1 circuit. *eLife*, *5*. <https://doi.org/10.7554/eLife.18566>  
1924
- 1925 Malik, R., Dougherty, K. A., Parikh, K., Byrne, C., & Johnston, D. (2016). Mapping the electrophysiolog-  
1926 ical and morphological properties of CA1 pyramidal neurons along the longitudinal hippocampal  
1927 axis. *Hippocampus*, *26*(3), 341–361. <https://doi.org/10.1002/hipo.22526>
- 1928 Van Geit, W., Gevaert, M., Chindemi, G., Rössert, C., Courcol, J.-D., Muller, E. B., Schürmann, F.,  
1929 Segev, I., & Markram, H. (2016). BluePyOpt: Leveraging open source software and cloud in-  
1930 frastructure to optimise model parameters in neuroscience. *Front. Neuroinform.*, *10*, 17. <https://doi.org/10.3389/fninf.2016.00017>  
1931
- 1932 Dannenberg, H., Young, K., & Hasselmo, M. (2017). Modulation of hippocampal circuits by muscarinic  
1933 and nicotinic receptors. *Front. Neural Circuits*, *11*, 102. [https://doi.org/10.3389/fncir.2017.](https://doi.org/10.3389/fncir.2017.00102)  
1934 00102
- 1935 Ferguson, K. A., Chatzikalymniou, A. P., & Skinner, F. K. (2017). Combining theory, model, and  
1936 experiment to explain how intrinsic theta rhythms are generated in an in vitro whole hippocampus  
1937 preparation without oscillatory inputs. *eNeuro*, *4*(4). [https://doi.org/10.1523/ENEURO.0131-](https://doi.org/10.1523/ENEURO.0131-17.2017)  
1938 17.2017
- 1939 Gal, E., London, M., Globerson, A., Ramaswamy, S., Reimann, M. W., Muller, E., Markram, H., &  
1940 Segev, I. (2017). Rich cell-type-specific network topology in neocortical microcircuitry. *Nature*  
1941 *Neuroscience*, *20*(7), 1004–1013. <https://doi.org/10.1038/nn.4576>
- 1942 Pelkey, K. A., Chittajallu, R., Craig, M. T., Tricoire, L., Wester, J. C., & McBain, C. J. (2017).  
1943 Hippocampal GABAergic inhibitory interneurons. *Physiol. Rev.*, *97*(4), 1619–1747. [https://doi.](https://doi.org/10.1152/physrev.00007.2017)  
1944 [org/10.1152/physrev.00007.2017](https://doi.org/10.1152/physrev.00007.2017)
- 1945 Abdellah, M., Hernando, J., Eilemann, S., Lapere, S., Antille, N., Markram, H., & Schürmann, F.  
1946 (2018). NeuroMorphoVis: A collaborative framework for analysis and visualization of neuronal  
1947 morphology skeletons reconstructed from microscopy stacks. *Bioinformatics (Oxford, England)*,  
1948 *34*(13), i574–i582. <https://doi.org/10.1093/bioinformatics/bty231>
- 1949 Denker, M., Yegenoglu, A., & Grün, S. (2018). Collaborative HPC-enabled workflows on the HBP  
1950 collaborative using the elephant framework [Publisher: G-Node]. [https://doi.org/10.12751/](https://doi.org/10.12751/INCF.NI2018.0019)  
1951 [INCF.NI2018.0019](https://doi.org/10.12751/INCF.NI2018.0019)
- 1952 Dumas, T. C., Uttaro, M. R., Barriga, C., Brinkley, T., Halavi, M., Wright, S. N., Ferrante, M., Evans,  
1953 R. C., Hawes, S. L., & Sanders, E. M. (2018). Removal of area CA3 from hippocampal slices  
1954 induces postsynaptic plasticity at schaffer collateral synapses that normalizes CA1 pyramidal cell  
1955 discharge. *Neuroscience Letters*, *678*, 55–61. <https://doi.org/10.1016/j.neulet.2018.05.011>
- 1956 Economides, G., Falk, S., & Mercer, A. (2018). Biocytin recovery and 3D reconstructions of filled  
1957 hippocampal CA2 interneurons. *J. Vis. Exp.*, (141). <https://doi.org/10.3791/58592>
- 1958 Gerkin, R. C., Jarvis, R. J., & Crook, S. M. (2018). Towards systematic, data-driven validation of a  
1959 collaborative, multi-scale model of caenorhabditis elegans. *Philos. Trans. R. Soc. Lond. B Biol.*  
1960 *Sci.*, *373*(1758). <https://doi.org/10.1098/rstb.2017.0381>
- 1961 Kanari, L., Dłotko, P., Scolamiero, M., Levi, R., Shillcock, J., Hess, K., & Markram, H. (2018). A  
1962 topological representation of branching neuronal morphologies. *Neuroinformatics*, *16*(1), 3–13.  
1963 <https://doi.org/10.1007/s12021-017-9341-1>



- 1964 Migliore, R., Lupascu, C. A., Bologna, L. L., Romani, A., Courcol, J.-D., Antonel, S., Van Geit, W. A. H.,  
1965 Thomson, A. M., Mercer, A., Lange, S., Falck, J., Rössert, C. A., Shi, Y., Hagens, O., Pezzoli, M.,  
1966 Freund, T. F., Kali, S., Muller, E. B., Schürmann, F., . . . Migliore, M. (2018). The physiological  
1967 variability of channel density in hippocampal CA1 pyramidal cells and interneurons explored using  
1968 a unified data-driven modeling workflow (W. W. Lytton, Ed.). *PLoS Computational Biology*,  
1969 *14*(9), e1006423. <https://doi.org/10.1371/journal.pcbi.1006423>
- 1970 Müller, C., & Remy, S. (2018). Septo–hippocampal interaction. *Cell and Tissue Research*, *373*(3), 565–  
1971 575. <https://doi.org/10.1007/s00441-017-2745-2>
- 1972 Soltesz, I., & Losonczy, A. (2018). CA1 pyramidal cell diversity enabling parallel information processing  
1973 in the hippocampus [Number: 4 Publisher: Nature Publishing Group]. *Nature Neuroscience*,  
1974 *21*(4), 484–493. <https://doi.org/10.1038/s41593-018-0118-0>
- 1975 Barros-Zulaica, N., Rahmon, J., Chindemi, G., Perin, R., Markram, H., Muller, E., & Ramaswamy,  
1976 S. (2019). Estimating the readily-releasable vesicle pool size at synaptic connections in the  
1977 neocortex. *Frontiers in Synaptic Neuroscience*, *11*, 29. [https://doi.org/10.3389/fnsyn.2019.](https://doi.org/10.3389/fnsyn.2019.00029)  
1978 00029
- 1979 Colangelo, C., Shichkova, P., Keller, D., Markram, H., & Ramaswamy, S. (2019). Cellular, synaptic and  
1980 network effects of acetylcholine in the neocortex. *Frontiers in Neural Circuits*, *13*, 24. <https://doi.org/10.3389/fncir.2019.00024>
- 1982 Cornford, J. H., Mercier, M. S., Leite, M., Magloire, V., Häusser, M., & Kullmann, D. M. (2019).  
1983 Dendritic NMDA receptors in parvalbumin neurons enable strong and stable neuronal assemblies  
1984 (M. Bartos, G. L. Westbrook, C.-C. Lien, & J. C. Ponce, Eds.). *eLife*, *8*, e49872. [https://doi.](https://doi.org/10.7554/eLife.49872)  
1985 [org/10.7554/eLife.49872](https://doi.org/10.7554/eLife.49872)
- 1986 Fan, X., & Markram, H. (2019). A brief history of simulation neuroscience. *Front. Neuroinform.*, *13*,  
1987 32. <https://doi.org/10.3389/fninf.2019.00032>
- 1988 Kanari, L., Ramaswamy, S., Shi, Y., Morand, S., Meystre, J., Perin, R., Abdellah, M., Wang, Y., Hess,  
1989 K., & Markram, H. (2019). Objective morphological classification of neocortical pyramidal cells.  
1990 *Cereb. Cortex*, *29*(4), 1719–1735. <https://doi.org/10.1093/cercor/bhy339>
- 1991 Ecker, A., Romani, A., Sáray, S., Káli, S., Migliore, M., Falck, J., Lange, S., Mercer, A., Thomson, A. M.,  
1992 Muller, E., Reimann, M. W., & Ramaswamy, S. (2020). Data-driven integration of hippocampal  
1993 CA1 synaptic physiology in silico. *Hippocampus*, *30*(11), 1129–1145. [https://doi.org/10.1002/](https://doi.org/10.1002/hipo.23220)  
1994 [hipo.23220](https://doi.org/10.1002/hipo.23220)
- 1995 Goyal, A., Miller, J., Qasim, S. E., Watrous, A. J., Zhang, H., Stein, J. M., Inman, C. S., Gross,  
1996 R. E., Willie, J. T., Lega, B., Lin, J.-J., Sharan, A., Wu, C., Sperling, M. R., Sheth, S. A.,  
1997 McKhann, G. M., Smith, E. H., Schevon, C., & Jacobs, J. (2020). Functionally distinct high  
1998 and low theta oscillations in the human hippocampus. *Nature Communications*, *11*(1), 2469.  
1999 <https://doi.org/10.1038/s41467-020-15670-6>
- 2000 Hasselmo, M. E., Alexander, A. S., Dannenberg, H., & Newman, E. L. (2020). Overview of computational  
2001 models of hippocampus and related structures: Introduction to the special issue. *Hippocampus*,  
2002 *30*(4), 295–301. <https://doi.org/10.1002/hipo.23201>
- 2003 Moradi, K., & Ascoli, G. A. (2020). A comprehensive knowledge base of synaptic electrophysiology in  
2004 the rodent hippocampal formation. *Hippocampus*, *30*(4), 314–331. [https://doi.org/10.1002/](https://doi.org/10.1002/hipo.23148)  
2005 [hipo.23148](https://doi.org/10.1002/hipo.23148)

- 2006 Wang, Q., Ding, S.-L., Li, Y., Royall, J., Feng, D., Lesnar, P., Graddis, N., Naemi, M., Facer, B., Ho, A.,  
2007 Dolbeare, T., Blanchard, B., Dee, N., Wakeman, W., Hirokawa, K. E., Szafer, A., Sunkin, S. M.,  
2008 Oh, S. W., Bernard, A., . . . Ng, L. (2020). The allen mouse brain common coordinate framework:  
2009 A 3D reference atlas. *Cell*, *181*(4), 936–953.e20. <https://doi.org/10.1016/j.cell.2020.04.007>
- 2010 Yu, G. J., Bouteiller, J.-M. C., & Berger, T. W. (2020). Topographic organization of correlation along  
2011 the longitudinal and transverse axes in rat hippocampal CA3 due to excitatory afferents. *Front.*  
2012 *Comput. Neurosci.*, *14*, 588881. <https://doi.org/10.3389/fncom.2020.588881>
- 2013 Giacomelli, G., Tegolo, D., Spera, E., & Migliore, M. (2021). On the structural connectivity of large-scale  
2014 models of brain networks at cellular level. *Scientific Reports*, *11*(1), 4345. [https://doi.org/10.  
2015 \*1038/s41598-021-83759-z\*](https://doi.org/10.1038/s41598-021-83759-z)
- 2016 Palacios-Filardo, J., Udakis, M., Brown, G. A., Tehan, B. G., Congreve, M. S., Nathan, P. J., Brown,  
2017 A. J. H., & Mellor, J. R. (2021). Acetylcholine prioritises direct synaptic inputs from entorhinal  
2018 cortex to CA1 by differential modulation of feedforward inhibitory circuits. *Nature Communica-*  
2019 *tions*, *12*(1), 5475. <https://doi.org/10.1038/s41467-021-25280-5>
- 2020 Sanchez-Aguilera, A., Wheeler, D. W., Jurado-Parras, T., Valero, M., Nokia, M. S., Cid, E., Fernandez-  
2021 Lamo, I., Sutton, N., Garcia-Rincon, D., de la Prida, L. M., & Ascoli, G. A. (2021). An update  
2022 to hippocampome.org by integrating single-cell phenotypes with circuit function in vivo. *PLoS*  
2023 *biology*, *19*(5), e3001213. <https://doi.org/10.1371/journal.pbio.3001213>
- 2024 Sáray, S., Rössert, C. A., Appukuttan, S., Migliore, R., Vitale, P., Lupascu, C. A., Bologna, L. L., Van  
2025 Geit, W., Romani, A., Davison, A. P., Muller, E., Freund, T. F., & Káli, S. (2021). HippoUnit:  
2026 A software tool for the automated testing and systematic comparison of detailed models of  
2027 hippocampal neurons based on electrophysiological data. *PLoS Comput. Biol.*, *17*(1), e1008114.  
2028 <https://doi.org/10.1371/journal.pcbi.1008114>
- 2029 Sutton, N. M., & Ascoli, G. A. (2021). Spiking neural networks and hippocampal function: A web-  
2030 accessible survey of simulations, modeling methods, and underlying theories. *Cognitive Systems*  
2031 *Research*, *70*, 80–92. <https://doi.org/10.1016/j.cogsys.2021.07.008>
- 2032 Yang, D., Ding, C., Qi, G., & Feldmeyer, D. (2021). Cholinergic and adenosinergic modulation of synaptic  
2033 release. *Neuroscience*, *456*, 114–130. <https://doi.org/10.1016/j.neuroscience.2020.06.006>
- 2034 Zisis, E., Keller, D., Kanari, L., Arnaudon, A., Gevaert, M., Delemontex, T., Coste, B., Foni, A., Ab-  
2035 dellah, M., Cali, C., Hess, K., Magistretti, P. J., Schürmann, F., & Markram, H. (2021). Dig-  
2036 ital reconstruction of the Neuro-Glia-Vascular architecture. *Cereb. Cortex*, *31*(12), 5686–5703.  
2037 <https://doi.org/10.1093/cercor/bhab254>
- 2038 Awile, O., Kumbhar, P., Cornu, N., Dura-Bernal, S., King, J. G., Lupton, O., Magkanaris, I., McDougal,  
2039 R. A., Newton, A. J. H., Pereira, F., Savulescu, A., Carnevale, N. T., Lytton, W. W., Hines, M. L.,  
2040 & Schurmann, F. (2022). Modernizing the NEURON simulator for sustainability, portability, and  
2041 performance. *Front. Neuroinform.*, *16*, 884046. <https://doi.org/10.3389/fninf.2022.884046>
- 2042 Palacios, J., Lida Kanari, Zisis, E., MikeG, Benoit Coste, Asanin-Epfl, Vanherpe, L., Jdcourcol, Arnaudon,  
2043 A., Berchet, A., Haleepfl, Getta, P., Povolotsky, A. V., A Sato, Alex4200, Bbpgithubaudit, Fi-  
2044 carelli, G., Amsalem, O., Stefanoantonel, & Tomdele. (2022). Bluebrain/neurom: V3.2.2. <https://doi.org/10.5281/ZENODO.597333>
- 2045
- 2046 Reimann, M. W., Bolaños-Puchet, S., Courcol, J.-D., Santander, D. E., Arnaudon, A., Coste, B., Dele-  
2047 montex, T., Devresse, A., Dictus, H., Dietz, A., Ecker, A., Favreau, C., Ficarelli, G., Gevaert,

- 2048 M., Hernando, J. B., Herttuainen, J., Isbister, J. B., Kanari, L., Keller, D., . . . Markram, H.  
2049 (2022). Modeling and Simulation of Rat Non-Barrel Somatosensory Cortex. Part I: Modeling  
2050 Anatomy. *bioRxiv*, 2022.08.11.503144. <https://doi.org/10.1101/2022.08.11.503144>
- 2051 Romani, A., Schürmann, F., Markram, H., & Migliore, M. (2022). Reconstruction of the hippocampus.  
2052 *Advances in Experimental Medicine and Biology*, 1359, 261–283. [https://doi.org/10.1007/978-](https://doi.org/10.1007/978-3-030-89439-9_11)  
2053 [3-030-89439-9\\_11](https://doi.org/10.1007/978-3-030-89439-9_11)
- 2054 Iavarone, E., Simko, J., Shi, Y., Bertschy, M., Garcia-Amado, M., Litvak, P., Kaufmann, A.-K., O'Reilly,  
2055 C., Amsalem, O., Abdellah, M., Chevtchenko, G., Coste, B., Courcol, J.-D., Ecker, A., Favreau,  
2056 C., Fleury, A. C., Van Geit, W., Gevaert, M., Guerrero, N. R., . . . Hill, S. L. (2023). Thalamic  
2057 control of sensory processing and spindles in a biophysical somatosensory thalamoreticular circuit  
2058 model of wakefulness and sleep. *Cell Rep.*, 42(3), 112200. [https://doi.org/10.1016/j.celrep.](https://doi.org/10.1016/j.celrep.2023.112200)  
2059 [2023.112200](https://doi.org/10.1016/j.celrep.2023.112200)
- 2060 Isbister, J. B., Ecker, A., Pokorny, C., Bolaños-Puchet, S., Santander, D. E., Arnaudon, A., Awile, O.,  
2061 Barros-Zulaica, N., Alonso, J. B., Boci, E., Chindemi, G., Courcol, J.-D., Damart, T., Delemon-  
2062 tex, T., Dietz, A., Ficarelli, G., Gevaert, M., Herttuainen, J., Ivaska, G., . . . Reimann, M. W.  
2063 (2023). Modeling and simulation of neocortical micro- and mesocircuitry. part II: Physiology  
2064 and experimentation. *bioRxiv*, 2023.05.17.541168. <https://doi.org/10.1101/2023.05.17.541168>
